# Supplementary material for: Introgression and monitoring of wild Helianthus praecox alien segments associated with Sclerotinia basal stalk rot resistance in sunflower using genotyping-by-sequencing
Source: PLoS One. 2019 Mar 1;14(3):e0213065. doi: 10.1371/journal.pone.0213065 (PMC6396933; doi:10.1371/journal.pone.0213065)
Supplement: S1 Table — (XLSX) [file pone.0213065.s002.xlsx]

## Sheet: GBS-H.praecox_ILs
S1 Table Total SNP markers detected from genotype-by-sequencing protocol in cultivated parents, HA 89 and HA 458, and H. praecox sunflower intrgression lines genome
rs#	alleles	chrom	pos	strand	assembly#	center	protLSID	assayLSID	panelLSID	QCcode	HA458	HA89	H.pra1	H.pra2	H.pra3	H.pra4	H.pra5	H.pra6	H.pra7	H.pra8
S1_802357	A/G	1	802357	+	NA	NA	NA	NA	NA	NA	A	A	A	A	A	A	N	N	N	A
S1_970785	G/A	1	970785	+	NA	NA	NA	NA	NA	NA	R	G	R	R	G	R	A	N	A	G
S1_970795	C/T	1	970795	+	NA	NA	NA	NA	NA	NA	Y	C	Y	Y	C	Y	T	N	T	C
S1_970810	A/C	1	970810	+	NA	NA	NA	NA	NA	NA	A	A	A	A	A	A	A	N	A	A
S1_2502103	T/C	1	2502103	+	NA	NA	NA	NA	NA	NA	C	T	N	Y	Y	N	C	T	Y	Y
S1_2548559	C/T	1	2548559	+	NA	NA	NA	NA	NA	NA	N	Y	Y	N	N	Y	Y	Y	N	N
S1_3244487	T/A	1	3244487	+	NA	NA	NA	NA	NA	NA	T	T	T	T	T	W	W	T	W	T
S1_3244489	C/T	1	3244489	+	NA	NA	NA	NA	NA	NA	C	Y	C	C	C	C	Y	C	C	C
S1_3244510	A/G	1	3244510	+	NA	NA	NA	NA	NA	NA	A	R	A	A	A	R	R	A	R	R
S1_3244515	C/G	1	3244515	+	NA	NA	NA	NA	NA	NA	C	C	C	C	C	C	C	C	C	C
S1_3244526	T/C	1	3244526	+	NA	NA	NA	NA	NA	NA	T	Y	T	T	T	T	Y	T	T	Y
S1_3706317	A/C	1	3706317	+	NA	NA	NA	NA	NA	NA	M	M	A	M	M	M	M	C	C	M
S1_3706895	T/G	1	3706895	+	NA	NA	NA	NA	NA	NA	T	T	T	N	T	N	N	N	N	T
S1_3706904	A/C	1	3706904	+	NA	NA	NA	NA	NA	NA	A	A	A	N	A	N	N	N	N	A
S1_3706924	G/A	1	3706924	+	NA	NA	NA	NA	NA	NA	G	G	G	N	G	N	N	N	N	G
S1_3706931	G/A	1	3706931	+	NA	NA	NA	NA	NA	NA	G	G	G	N	G	N	N	N	N	G
S1_3706993	T/C	1	3706993	+	NA	NA	NA	NA	NA	NA	T	T	T	T	T	T	N	N	N	T
S1_4475040	A/G	1	4475040	+	NA	NA	NA	NA	NA	NA	N	A	A	A	A	A	N	N	N	A
S1_4658800	T/A	1	4658800	+	NA	NA	NA	NA	NA	NA	T	N	T	N	T	T	N	N	N	T
S1_4658807	T/A	1	4658807	+	NA	NA	NA	NA	NA	NA	T	N	T	N	T	T	N	N	N	T
S1_4881427	A/G	1	4881427	+	NA	NA	NA	NA	NA	NA	A	A	A	A	A	A	N	N	A	A
S1_4881487	A/T	1	4881487	+	NA	NA	NA	NA	NA	NA	A	A	A	A	A	A	A	N	A	A
S1_4881505	C/A	1	4881505	+	NA	NA	NA	NA	NA	NA	C	C	C	M	M	C	A	N	C	M
S1_4881512	T/C	1	4881512	+	NA	NA	NA	NA	NA	NA	T	T	T	Y	Y	T	C	N	T	Y
S1_4881513	G/C	1	4881513	+	NA	NA	NA	NA	NA	NA	G	G	G	S	S	G	C	N	G	S
S1_4881525	G/A	1	4881525	+	NA	NA	NA	NA	NA	NA	G	G	G	R	R	G	A	N	G	R
S1_4881533	C/A	1	4881533	+	NA	NA	NA	NA	NA	NA	C	C	C	C	C	C	C	N	C	C
S1_4881544	G/A	1	4881544	+	NA	NA	NA	NA	NA	NA	G	G	G	G	G	G	G	N	G	G
S1_5633129	C/T	1	5633129	+	NA	NA	NA	NA	NA	NA	C	C	C	C	C	C	N	N	C	C
S1_5633130	T/C	1	5633130	+	NA	NA	NA	NA	NA	NA	T	T	T	T	T	T	N	N	T	T
S1_5633132	C/A	1	5633132	+	NA	NA	NA	NA	NA	NA	C	C	C	C	C	C	N	N	C	C
S1_5633162	T/A	1	5633162	+	NA	NA	NA	NA	NA	NA	T	T	T	T	T	T	N	N	T	T
S1_5633165	G/T	1	5633165	+	NA	NA	NA	NA	NA	NA	G	G	G	G	G	G	N	N	G	G
S1_5633166	T/C	1	5633166	+	NA	NA	NA	NA	NA	NA	Y	Y	Y	Y	T	Y	Y	Y	Y	Y
S1_5633167	G/A	1	5633167	+	NA	NA	NA	NA	NA	NA	G	G	G	G	G	G	N	N	G	G
S1_5633174	T/G	1	5633174	+	NA	NA	NA	NA	NA	NA	T	T	T	T	T	T	T	T	T	T
S1_5633177	G/A	1	5633177	+	NA	NA	NA	NA	NA	NA	G	G	G	G	G	G	N	N	G	G
S1_5633208	G/A	1	5633208	+	NA	NA	NA	NA	NA	NA	G	G	G	G	G	G	G	G	G	G
S1_6141016	T/G	1	6141016	+	NA	NA	NA	NA	NA	NA	T	T	T	T	T	T	T	N	T	T
S1_6732702	T/G	1	6732702	+	NA	NA	NA	NA	NA	NA	T	T	T	T	T	T	N	N	N	G
S1_6732734	T/C	1	6732734	+	NA	NA	NA	NA	NA	NA	C	T	T	T	T	T	N	N	N	T
S1_6732739	C/T	1	6732739	+	NA	NA	NA	NA	NA	NA	C	C	C	C	C	C	N	N	N	C
S1_6948376	A/G	1	6948376	+	NA	NA	NA	NA	NA	NA	R	R	R	R	R	G	G	G	A	R
S1_7772477	C/G	1	7772477	+	NA	NA	NA	NA	NA	NA	C	C	G	C	C	G	C	G	C	C
S1_7772494	C/A	1	7772494	+	NA	NA	NA	NA	NA	NA	C	C	A	C	C	A	C	A	C	C
S1_8091005	A/G	1	8091005	+	NA	NA	NA	NA	NA	NA	A	N	A	A	A	A	A	A	A	A
S1_8091104	A/G	1	8091104	+	NA	NA	NA	NA	NA	NA	A	A	A	A	A	A	A	N	A	A
S1_8260839	C/T	1	8260839	+	NA	NA	NA	NA	NA	NA	N	N	N	N	C	Y	Y	Y	Y	Y
S1_8260864	G/A	1	8260864	+	NA	NA	NA	NA	NA	NA	N	N	N	N	G	G	G	G	G	G
S1_9593016	T/C	1	9593016	+	NA	NA	NA	NA	NA	NA	C	T	T	C	C	T	Y	T	C	C
S1_11165726	T/A	1	11165726	+	NA	NA	NA	NA	NA	NA	T	W	T	T	W	T	T	T	T	W
S1_11165739	C/A	1	11165739	+	NA	NA	NA	NA	NA	NA	C	C	C	C	C	C	C	C	C	C
S1_11435225	A/T	1	11435225	+	NA	NA	NA	NA	NA	NA	T	T	T	T	T	T	N	N	N	T
S1_11947774	G/T	1	11947774	+	NA	NA	NA	NA	NA	NA	G	G	G	G	G	G	G	G	G	G
S1_11985213	C/T	1	11985213	+	NA	NA	NA	NA	NA	NA	C	C	C	C	C	C	N	N	N	C
S1_11985286	A/G	1	11985286	+	NA	NA	NA	NA	NA	NA	N	N	A	N	A	A	N	N	N	A
S1_11985330	T/C	1	11985330	+	NA	NA	NA	NA	NA	NA	N	N	T	N	T	T	N	N	N	Y
S1_12037399	G/A	1	12037399	+	NA	NA	NA	NA	NA	NA	G	G	G	G	G	G	N	N	N	G
S1_13307956	C/A	1	13307956	+	NA	NA	NA	NA	NA	NA	A	A	A	A	A	A	A	A	A	A
S1_13307968	A/G	1	13307968	+	NA	NA	NA	NA	NA	NA	A	A	A	A	A	R	G	G	G	R
S1_13307969	C/G	1	13307969	+	NA	NA	NA	NA	NA	NA	G	G	G	G	G	S	C	C	C	S
S1_15456481	C/G	1	15456481	+	NA	NA	NA	NA	NA	NA	C	C	C	C	C	S	G	G	G	S
S1_15456493	G/A	1	15456493	+	NA	NA	NA	NA	NA	NA	G	G	G	G	G	R	A	A	A	R
S1_15456515	G/A	1	15456515	+	NA	NA	NA	NA	NA	NA	G	G	N	G	G	G	N	N	N	N
S1_15456602	C/T	1	15456602	+	NA	NA	NA	NA	NA	NA	C	C	C	C	C	C	N	N	N	C
S1_15560820	C/T	1	15560820	+	NA	NA	NA	NA	NA	NA	C	C	N	C	C	C	Y	N	C	C
S1_15560859	C/T	1	15560859	+	NA	NA	NA	NA	NA	NA	T	C	N	C	C	C	C	N	Y	Y
S1_16270876	G/A	1	16270876	+	NA	NA	NA	NA	NA	NA	G	G	G	G	G	G	G	G	G	G
S1_16270885	G/A	1	16270885	+	NA	NA	NA	NA	NA	NA	G	G	G	G	G	G	G	G	G	G
S1_16270912	G/C	1	16270912	+	NA	NA	NA	NA	NA	NA	S	S	S	S	G	S	G	G	G	S
S1_16270918	A/T	1	16270918	+	NA	NA	NA	NA	NA	NA	W	W	W	A	A	A	A	A	A	A
S1_17035870	C/T	1	17035870	+	NA	NA	NA	NA	NA	NA	Y	Y	N	C	N	C	N	T	C	Y
S1_17035970	C/T	1	17035970	+	NA	NA	NA	NA	NA	NA	N	C	N	N	C	C	C	T	Y	Y
S1_17035979	A/G	1	17035979	+	NA	NA	NA	NA	NA	NA	N	A	N	N	A	A	A	A	A	A
S1_17035985	T/A	1	17035985	+	NA	NA	NA	NA	NA	NA	N	W	N	N	T	A	A	T	W	W
S1_17035986	A/G	1	17035986	+	NA	NA	NA	NA	NA	NA	N	A	N	N	A	A	A	G	R	R
S1_17035996	A/T	1	17035996	+	NA	NA	NA	NA	NA	NA	N	A	N	N	A	A	A	T	W	W
S1_17036022	A/T	1	17036022	+	NA	NA	NA	NA	NA	NA	A	A	A	A	A	W	W	W	W	A
S1_17036046	T/C	1	17036046	+	NA	NA	NA	NA	NA	NA	Y	Y	Y	Y	Y	Y	Y	Y	Y	Y
S1_17036047	G/A	1	17036047	+	NA	NA	NA	NA	NA	NA	R	R	R	R	G	R	R	R	R	G
S1_17036056	G/A	1	17036056	+	NA	NA	NA	NA	NA	NA	G	R	G	R	R	G	G	R	G	R
S1_17036057	A/G	1	17036057	+	NA	NA	NA	NA	NA	NA	R	R	R	R	R	R	R	A	R	A
S1_17036058	T/C	1	17036058	+	NA	NA	NA	NA	NA	NA	Y	Y	Y	Y	Y	Y	Y	Y	Y	Y
S1_17036064	G/A	1	17036064	+	NA	NA	NA	NA	NA	NA	R	N	R	R	R	R	N	R	R	R
S1_18309683	C/T	1	18309683	+	NA	NA	NA	NA	NA	NA	C	C	C	C	C	C	N	N	N	C
S1_19132692	T/A	1	19132692	+	NA	NA	NA	NA	NA	NA	T	T	T	T	T	T	N	N	N	T
S1_19132697	C/T	1	19132697	+	NA	NA	NA	NA	NA	NA	C	C	C	C	C	C	N	N	N	C
S1_19132724	G/A	1	19132724	+	NA	NA	NA	NA	NA	NA	G	G	G	G	G	G	N	N	N	G
S1_19132726	G/A	1	19132726	+	NA	NA	NA	NA	NA	NA	G	G	G	G	G	G	N	N	N	G
S1_19132939	T/C	1	19132939	+	NA	NA	NA	NA	NA	NA	N	T	N	T	T	T	N	N	N	T
S1_21877701	G/A	1	21877701	+	NA	NA	NA	NA	NA	NA	G	G	G	G	G	G	N	N	N	G
S1_21946061	T/C	1	21946061	+	NA	NA	NA	NA	NA	NA	T	T	T	T	T	T	N	N	N	T
S1_22248532	C/A	1	22248532	+	NA	NA	NA	NA	NA	NA	C	C	C	C	C	M	N	N	N	C
S1_22879453	C/T	1	22879453	+	NA	NA	NA	NA	NA	NA	Y	Y	Y	Y	Y	Y	C	C	C	Y
S1_22879470	T/G	1	22879470	+	NA	NA	NA	NA	NA	NA	K	K	K	K	K	K	T	T	T	K
S1_22879493	G/T	1	22879493	+	NA	NA	NA	NA	NA	NA	K	K	K	K	K	K	G	G	G	K
S1_23163722	G/T	1	23163722	+	NA	NA	NA	NA	NA	NA	G	K	K	G	G	K	N	N	N	G
S1_23163756	G/C	1	23163756	+	NA	NA	NA	NA	NA	NA	G	S	S	G	G	S	N	N	N	G
S1_23163759	G/C	1	23163759	+	NA	NA	NA	NA	NA	NA	G	G	G	G	G	G	N	N	N	G
S1_23163761	T/A	1	23163761	+	NA	NA	NA	NA	NA	NA	T	T	T	T	W	T	N	N	N	T
S1_23163767	T/C	1	23163767	+	NA	NA	NA	NA	NA	NA	T	Y	Y	T	T	Y	N	N	N	T
S1_23163827	T/A	1	23163827	+	NA	NA	NA	NA	NA	NA	N	W	A	A	A	W	N	T	N	N
S1_23163829	G/C	1	23163829	+	NA	NA	NA	NA	NA	NA	N	G	G	G	G	S	N	S	N	N
S1_23163851	G/A	1	23163851	+	NA	NA	NA	NA	NA	NA	N	G	G	G	G	R	N	R	N	N
S1_23163873	A/C	1	23163873	+	NA	NA	NA	NA	NA	NA	N	M	C	C	C	M	N	A	N	N
S1_23163882	C/T	1	23163882	+	NA	NA	NA	NA	NA	NA	N	Y	C	C	C	Y	N	Y	N	N
S1_23227440	G/T	1	23227440	+	NA	NA	NA	NA	NA	NA	K	K	K	K	K	K	K	K	G	K
S1_23227441	G/C	1	23227441	+	NA	NA	NA	NA	NA	NA	S	S	S	G	S	S	S	S	G	S
S1_23227464	A/G	1	23227464	+	NA	NA	NA	NA	NA	NA	R	R	R	A	R	R	R	R	A	R
S1_23227479	G/A	1	23227479	+	NA	NA	NA	NA	NA	NA	R	R	R	G	R	R	R	R	G	R
S1_23227490	C/A	1	23227490	+	NA	NA	NA	NA	NA	NA	M	M	M	M	M	M	M	M	C	M
S1_23233215	G/A	1	23233215	+	NA	NA	NA	NA	NA	NA	G	R	R	G	G	R	R	R	G	N
S1_23233410	A/G	1	23233410	+	NA	NA	NA	NA	NA	NA	R	R	R	R	R	R	A	A	A	G
S1_23233430	G/A	1	23233430	+	NA	NA	NA	NA	NA	NA	R	R	R	R	R	R	R	R	R	G
S1_23353789	T/C	1	23353789	+	NA	NA	NA	NA	NA	NA	N	T	T	T	T	T	T	T	T	T
S1_23353792	C/T	1	23353792	+	NA	NA	NA	NA	NA	NA	N	C	C	C	C	C	C	C	C	C
S1_23353798	A/C	1	23353798	+	NA	NA	NA	NA	NA	NA	N	A	A	A	A	A	A	A	A	A
S1_23353807	A/G	1	23353807	+	NA	NA	NA	NA	NA	NA	N	A	A	A	A	A	A	A	A	A
S1_23353816	T/C	1	23353816	+	NA	NA	NA	NA	NA	NA	N	T	T	T	T	T	T	T	T	T
S1_23353825	C/G	1	23353825	+	NA	NA	NA	NA	NA	NA	N	C	C	C	C	C	C	C	C	C
S1_23831584	C/G	1	23831584	+	NA	NA	NA	NA	NA	NA	C	N	C	C	C	S	N	N	N	C
S1_23831585	G/C	1	23831585	+	NA	NA	NA	NA	NA	NA	G	N	G	G	G	G	N	N	N	G
S1_23831586	G/C	1	23831586	+	NA	NA	NA	NA	NA	NA	G	N	G	G	S	S	N	N	N	S
S1_23831587	C/A	1	23831587	+	NA	NA	NA	NA	NA	NA	C	N	C	C	C	C	N	N	N	C
S1_24147551	T/A	1	24147551	+	NA	NA	NA	NA	NA	NA	T	T	T	T	T	T	N	N	N	T
S1_24147566	T/A	1	24147566	+	NA	NA	NA	NA	NA	NA	T	T	T	T	T	T	N	N	N	T
S1_24667271	T/G	1	24667271	+	NA	NA	NA	NA	NA	NA	T	T	T	T	K	T	N	G	G	T
S1_24667274	A/G	1	24667274	+	NA	NA	NA	NA	NA	NA	A	A	A	A	R	A	N	G	G	A
S1_25004872	T/A	1	25004872	+	NA	NA	NA	NA	NA	NA	W	T	W	W	W	W	W	T	W	T
S1_25004887	G/A	1	25004887	+	NA	NA	NA	NA	NA	NA	R	R	R	R	R	R	R	R	R	G
S1_25004909	C/T	1	25004909	+	NA	NA	NA	NA	NA	NA	Y	C	Y	Y	Y	Y	Y	C	Y	C
S1_25195764	A/G	1	25195764	+	NA	NA	NA	NA	NA	NA	A	A	A	A	A	A	A	A	A	A
S1_25195767	T/G	1	25195767	+	NA	NA	NA	NA	NA	NA	K	K	T	T	T	T	T	K	T	K
S1_25195771	G/T	1	25195771	+	NA	NA	NA	NA	NA	NA	G	G	G	G	G	G	G	K	G	G
S1_25195779	A/G	1	25195779	+	NA	NA	NA	NA	NA	NA	A	A	A	A	A	A	A	A	A	A
S1_25195780	G/A	1	25195780	+	NA	NA	NA	NA	NA	NA	G	G	G	G	G	G	G	G	G	G
S1_25195784	G/T	1	25195784	+	NA	NA	NA	NA	NA	NA	G	K	G	G	G	G	G	G	G	G
S1_25195812	C/T	1	25195812	+	NA	NA	NA	NA	NA	NA	C	C	C	C	C	C	C	C	C	C
S1_25859775	A/G	1	25859775	+	NA	NA	NA	NA	NA	NA	A	N	A	A	A	A	A	A	A	A
S1_25859789	T/C	1	25859789	+	NA	NA	NA	NA	NA	NA	Y	N	T	Y	T	Y	Y	T	T	T
S1_25859818	A/G	1	25859818	+	NA	NA	NA	NA	NA	NA	A	N	A	A	A	A	A	A	A	A
S1_25859821	T/C	1	25859821	+	NA	NA	NA	NA	NA	NA	T	N	T	T	T	T	T	T	T	T
S1_26427229	T/G	1	26427229	+	NA	NA	NA	NA	NA	NA	G	G	G	G	G	G	G	G	G	G
S1_26427234	T/G	1	26427234	+	NA	NA	NA	NA	NA	NA	G	G	G	G	G	G	G	G	G	G
S1_26427278	T/C	1	26427278	+	NA	NA	NA	NA	NA	NA	C	C	C	C	C	C	C	C	C	C
S1_26427288	C/G	1	26427288	+	NA	NA	NA	NA	NA	NA	G	G	G	G	G	G	G	G	G	G
S1_26449897	G/A	1	26449897	+	NA	NA	NA	NA	NA	NA	A	G	G	A	A	G	R	G	A	A
S1_26918622	A/G	1	26918622	+	NA	NA	NA	NA	NA	NA	A	R	A	A	A	R	A	R	A	R
S1_26918646	C/T	1	26918646	+	NA	NA	NA	NA	NA	NA	C	C	C	C	C	C	C	C	C	C
S1_26918649	T/A	1	26918649	+	NA	NA	NA	NA	NA	NA	T	T	T	T	T	T	T	T	T	T
S1_26918670	A/G	1	26918670	+	NA	NA	NA	NA	NA	NA	A	A	A	A	A	A	A	A	A	A
S1_26918675	A/T	1	26918675	+	NA	NA	NA	NA	NA	NA	W	W	W	W	W	W	W	A	A	W
S1_27059435	T/C	1	27059435	+	NA	NA	NA	NA	NA	NA	T	T	T	T	T	Y	C	C	C	Y
S1_27059462	T/G	1	27059462	+	NA	NA	NA	NA	NA	NA	T	T	T	T	T	K	G	G	G	K
S1_27753331	A/C	1	27753331	+	NA	NA	NA	NA	NA	NA	A	A	A	A	A	A	N	N	N	A
S1_27816774	G/T	1	27816774	+	NA	NA	NA	NA	NA	NA	G	G	G	G	G	G	N	N	N	G
S1_28035484	A/C	1	28035484	+	NA	NA	NA	NA	NA	NA	M	M	A	A	A	N	N	N	N	A
S1_28035501	A/C	1	28035501	+	NA	NA	NA	NA	NA	NA	M	A	A	N	A	A	N	N	N	A
S1_28035507	A/C	1	28035507	+	NA	NA	NA	NA	NA	NA	A	A	A	A	A	A	N	N	N	A
S1_28240917	T/C	1	28240917	+	NA	NA	NA	NA	NA	NA	T	T	T	T	T	T	T	T	N	T
S1_28240938	G/A	1	28240938	+	NA	NA	NA	NA	NA	NA	G	G	G	G	G	G	G	G	N	G
S1_28240964	A/T	1	28240964	+	NA	NA	NA	NA	NA	NA	A	A	A	A	A	A	A	A	N	A
S1_28416780	G/T	1	28416780	+	NA	NA	NA	NA	NA	NA	N	G	G	G	G	G	G	G	N	G
S1_28416815	A/G	1	28416815	+	NA	NA	NA	NA	NA	NA	N	A	A	A	A	A	A	A	N	A
S1_28416897	A/C	1	28416897	+	NA	NA	NA	NA	NA	NA	M	N	A	M	M	M	M	M	M	M
S1_28725140	G/A	1	28725140	+	NA	NA	NA	NA	NA	NA	G	G	G	G	G	R	A	R	A	R
S1_28725194	T/A	1	28725194	+	NA	NA	NA	NA	NA	NA	T	T	T	T	T	W	A	A	A	W
S1_29369252	C/G	1	29369252	+	NA	NA	NA	NA	NA	NA	C	C	C	C	C	C	N	N	N	C
S1_29856534	A/T	1	29856534	+	NA	NA	NA	NA	NA	NA	A	W	W	A	A	W	N	T	N	A
S1_29856559	C/T	1	29856559	+	NA	NA	NA	NA	NA	NA	C	C	C	C	C	C	N	C	N	C
S1_30254057	A/G	1	30254057	+	NA	NA	NA	NA	NA	NA	R	A	R	G	A	R	G	R	G	A
S1_30254068	C/T	1	30254068	+	NA	NA	NA	NA	NA	NA	Y	C	Y	T	Y	Y	T	T	T	C
S1_30254069	T/C	1	30254069	+	NA	NA	NA	NA	NA	NA	Y	T	Y	C	T	Y	C	Y	C	T
S1_30724988	C/T	1	30724988	+	NA	NA	NA	NA	NA	NA	C	C	C	C	C	C	C	N	C	C
S1_30724989	T/G	1	30724989	+	NA	NA	NA	NA	NA	NA	T	T	T	T	T	T	T	N	T	T
S1_31246744	T/A	1	31246744	+	NA	NA	NA	NA	NA	NA	T	T	T	T	T	T	N	A	N	T
S1_31323403	G/T	1	31323403	+	NA	NA	NA	NA	NA	NA	G	G	G	G	G	K	T	T	T	K
S1_31323407	A/G	1	31323407	+	NA	NA	NA	NA	NA	NA	A	A	A	A	A	R	G	G	G	R
S1_31323475	A/G	1	31323475	+	NA	NA	NA	NA	NA	NA	A	A	A	A	A	A	A	A	A	A
S1_31544753	A/T	1	31544753	+	NA	NA	NA	NA	NA	NA	N	N	N	N	N	N	N	N	N	N
S1_31544773	G/A	1	31544773	+	NA	NA	NA	NA	NA	NA	N	N	N	N	N	N	N	N	N	N
S1_31544777	G/T	1	31544777	+	NA	NA	NA	NA	NA	NA	N	N	N	N	N	N	N	N	N	N
S1_31544791	A/G	1	31544791	+	NA	NA	NA	NA	NA	NA	N	N	N	N	N	N	N	N	N	N
S1_32306478	T/C	1	32306478	+	NA	NA	NA	NA	NA	NA	T	T	T	T	T	Y	C	C	C	Y
S1_32306490	C/G	1	32306490	+	NA	NA	NA	NA	NA	NA	C	C	C	C	C	S	G	G	G	S
S1_32306503	C/T	1	32306503	+	NA	NA	NA	NA	NA	NA	C	C	C	C	C	Y	T	T	T	Y
S1_32369633	T/C	1	32369633	+	NA	NA	NA	NA	NA	NA	T	T	T	T	T	T	T	T	T	T
S1_32369723	C/T	1	32369723	+	NA	NA	NA	NA	NA	NA	C	C	C	C	C	C	C	C	C	C
S1_32780660	C/T	1	32780660	+	NA	NA	NA	NA	NA	NA	C	C	C	C	C	C	N	N	N	C
S1_32780721	A/G	1	32780721	+	NA	NA	NA	NA	NA	NA	A	A	A	A	A	A	N	N	N	A
S1_32780744	A/C	1	32780744	+	NA	NA	NA	NA	NA	NA	A	A	A	A	A	A	N	N	N	A
S1_33234571	T/C	1	33234571	+	NA	NA	NA	NA	NA	NA	T	N	N	T	T	T	T	T	T	T
S1_33234589	G/A	1	33234589	+	NA	NA	NA	NA	NA	NA	G	N	N	G	G	G	G	A	G	G
S1_33234605	A/G	1	33234605	+	NA	NA	NA	NA	NA	NA	A	N	N	A	A	A	A	A	A	A
S1_33234607	C/A	1	33234607	+	NA	NA	NA	NA	NA	NA	C	N	N	C	C	C	C	C	C	A
S1_33496170	A/C	1	33496170	+	NA	NA	NA	NA	NA	NA	A	A	A	A	A	A	N	N	N	C
S1_33952543	T/A	1	33952543	+	NA	NA	NA	NA	NA	NA	T	T	T	T	T	T	N	T	N	T
S1_34114903	T/G	1	34114903	+	NA	NA	NA	NA	NA	NA	N	T	T	T	T	T	N	N	N	T
S1_34251663	T/C	1	34251663	+	NA	NA	NA	NA	NA	NA	T	T	T	T	T	T	N	N	N	T
S1_34912743	T/A	1	34912743	+	NA	NA	NA	NA	NA	NA	W	W	W	W	W	W	W	T	W	T
S1_34912744	A/C	1	34912744	+	NA	NA	NA	NA	NA	NA	A	M	M	M	M	M	M	M	M	M
S1_34912757	G/A	1	34912757	+	NA	NA	NA	NA	NA	NA	G	G	G	G	G	G	G	G	G	G
S1_34912770	G/A	1	34912770	+	NA	NA	NA	NA	NA	NA	G	G	R	R	G	R	G	G	G	G
S1_34912772	T/C	1	34912772	+	NA	NA	NA	NA	NA	NA	T	T	T	T	T	T	T	T	T	T
S1_35570851	T/C	1	35570851	+	NA	NA	NA	NA	NA	NA	T	T	T	T	T	T	N	N	N	T
S1_35570911	A/G	1	35570911	+	NA	NA	NA	NA	NA	NA	A	N	A	A	A	A	N	N	N	A
S1_36230891	A/G	1	36230891	+	NA	NA	NA	NA	NA	NA	N	A	A	A	A	A	N	N	N	A
S1_36239670	T/G	1	36239670	+	NA	NA	NA	NA	NA	NA	T	N	N	G	T	K	N	G	G	T
S1_38370085	G/A	1	38370085	+	NA	NA	NA	NA	NA	NA	G	G	G	G	R	G	N	A	A	G
S1_38370099	C/T	1	38370099	+	NA	NA	NA	NA	NA	NA	C	C	C	C	Y	C	N	T	T	C
S1_38370109	C/T	1	38370109	+	NA	NA	NA	NA	NA	NA	C	C	C	C	C	C	N	C	C	C
S1_38370110	C/T	1	38370110	+	NA	NA	NA	NA	NA	NA	C	C	C	C	C	C	N	C	C	C
S1_38370177	C/T	1	38370177	+	NA	NA	NA	NA	NA	NA	C	C	C	C	C	C	N	N	T	C
S1_38370205	C/T	1	38370205	+	NA	NA	NA	NA	NA	NA	C	C	C	C	C	C	N	N	C	C
S1_38370210	T/A	1	38370210	+	NA	NA	NA	NA	NA	NA	T	T	T	T	T	T	N	N	T	T
S1_38619316	T/C	1	38619316	+	NA	NA	NA	NA	NA	NA	T	T	T	T	T	T	N	N	N	T
S1_38619369	G/A	1	38619369	+	NA	NA	NA	NA	NA	NA	G	G	G	G	G	G	N	N	N	G
S1_38705115	A/G	1	38705115	+	NA	NA	NA	NA	NA	NA	A	A	A	A	A	A	A	A	A	A
S1_38705116	T/C	1	38705116	+	NA	NA	NA	NA	NA	NA	Y	Y	Y	Y	T	Y	C	C	C	T
S1_38705126	T/C	1	38705126	+	NA	NA	NA	NA	NA	NA	Y	Y	Y	Y	T	Y	C	C	C	T
S1_38705154	T/A	1	38705154	+	NA	NA	NA	NA	NA	NA	T	T	T	T	T	T	T	T	T	T
S1_39212281	A/G	1	39212281	+	NA	NA	NA	NA	NA	NA	A	A	A	N	A	A	N	N	N	A
S1_39474608	A/G	1	39474608	+	NA	NA	NA	NA	NA	NA	A	A	A	A	A	A	N	N	N	A
S1_39827976	G/A	1	39827976	+	NA	NA	NA	NA	NA	NA	N	N	G	G	G	G	N	N	N	G
S1_39836587	A/T	1	39836587	+	NA	NA	NA	NA	NA	NA	A	A	A	A	A	A	A	A	A	A
S1_39836589	G/A	1	39836589	+	NA	NA	NA	NA	NA	NA	G	G	G	G	G	G	G	G	G	G
S1_39836598	C/A	1	39836598	+	NA	NA	NA	NA	NA	NA	C	C	C	C	C	C	C	C	C	C
S1_39836613	G/T	1	39836613	+	NA	NA	NA	NA	NA	NA	G	G	G	G	G	G	G	G	G	G
S1_39836619	C/A	1	39836619	+	NA	NA	NA	NA	NA	NA	M	M	M	M	C	M	C	C	C	C
S1_40015702	A/C	1	40015702	+	NA	NA	NA	NA	NA	NA	N	N	A	A	A	A	N	N	N	A
S1_40015703	C/T	1	40015703	+	NA	NA	NA	NA	NA	NA	C	N	C	C	C	C	N	N	N	C
S1_40380569	C/T	1	40380569	+	NA	NA	NA	NA	NA	NA	C	C	C	C	C	Y	T	T	T	Y
S1_40380578	T/A	1	40380578	+	NA	NA	NA	NA	NA	NA	T	T	T	T	T	T	T	T	T	T
S1_40579795	C/G	1	40579795	+	NA	NA	NA	NA	NA	NA	C	C	C	C	C	C	N	N	N	C
S1_42557736	T/C	1	42557736	+	NA	NA	NA	NA	NA	NA	Y	Y	Y	Y	Y	Y	T	T	T	Y
S1_42557766	G/T	1	42557766	+	NA	NA	NA	NA	NA	NA	K	K	K	K	K	K	G	G	G	K
S1_42798096	C/T	1	42798096	+	NA	NA	NA	NA	NA	NA	Y	C	Y	Y	Y	Y	Y	Y	C	C
S1_42965230	A/C	1	42965230	+	NA	NA	NA	NA	NA	NA	A	A	A	N	A	A	N	N	N	N
S1_43271854	C/T	1	43271854	+	NA	NA	NA	NA	NA	NA	C	C	C	C	C	C	C	C	C	C
S1_43271869	A/T	1	43271869	+	NA	NA	NA	NA	NA	NA	A	A	A	A	A	A	A	A	A	A
S1_43271875	T/C	1	43271875	+	NA	NA	NA	NA	NA	NA	T	T	T	T	T	T	T	T	T	T
S1_43327305	G/T	1	43327305	+	NA	NA	NA	NA	NA	NA	G	G	G	G	G	G	G	N	G	G
S1_43327307	C/G	1	43327307	+	NA	NA	NA	NA	NA	NA	N	S	S	G	S	G	S	N	G	S
S1_43327324	A/T	1	43327324	+	NA	NA	NA	NA	NA	NA	W	W	A	W	A	W	W	N	T	A
S1_43327331	G/A	1	43327331	+	NA	NA	NA	NA	NA	NA	R	R	G	R	G	R	R	N	A	G
S1_43327336	T/A	1	43327336	+	NA	NA	NA	NA	NA	NA	W	W	T	W	T	W	W	N	A	T
S1_43327350	T/C	1	43327350	+	NA	NA	NA	NA	NA	NA	Y	Y	T	Y	T	Y	Y	N	C	T
S1_43428550	C/T	1	43428550	+	NA	NA	NA	NA	NA	NA	C	C	C	C	C	C	N	N	T	C
S1_43428570	T/C	1	43428570	+	NA	NA	NA	NA	NA	NA	T	T	T	T	T	T	N	N	C	T
S1_43428575	A/T	1	43428575	+	NA	NA	NA	NA	NA	NA	A	A	A	A	A	A	N	N	T	A
S1_43428584	A/G	1	43428584	+	NA	NA	NA	NA	NA	NA	A	A	A	A	A	A	N	N	G	A
S1_43618482	G/A	1	43618482	+	NA	NA	NA	NA	NA	NA	R	G	G	R	R	R	G	R	R	G
S1_43618531	G/T	1	43618531	+	NA	NA	NA	NA	NA	NA	K	G	G	K	K	K	G	K	K	G
S1_44343527	A/T	1	44343527	+	NA	NA	NA	NA	NA	NA	A	A	A	A	A	A	N	N	N	A
S1_44702237	A/C	1	44702237	+	NA	NA	NA	NA	NA	NA	A	A	N	A	A	A	N	N	N	A
S1_44702296	A/C	1	44702296	+	NA	NA	NA	NA	NA	NA	A	A	A	A	A	M	C	N	C	M
S1_44702311	A/T	1	44702311	+	NA	NA	NA	NA	NA	NA	A	A	A	A	A	W	T	N	T	W
S1_44828769	T/C	1	44828769	+	NA	NA	NA	NA	NA	NA	T	T	T	Y	Y	T	Y	T	T	Y
S1_45168755	T/C	1	45168755	+	NA	NA	NA	NA	NA	NA	T	T	T	T	T	T	N	N	N	T
S1_45387368	C/A	1	45387368	+	NA	NA	NA	NA	NA	NA	C	C	C	C	C	C	N	N	N	C
S1_45387408	A/C	1	45387408	+	NA	NA	NA	NA	NA	NA	A	A	A	A	A	A	N	N	N	A
S1_45406006	G/A	1	45406006	+	NA	NA	NA	NA	NA	NA	R	N	N	R	R	R	R	R	R	R
S1_46605582	T/A	1	46605582	+	NA	NA	NA	NA	NA	NA	T	T	T	T	T	T	T	N	N	T
S1_46625866	A/G	1	46625866	+	NA	NA	NA	NA	NA	NA	A	A	A	A	A	A	N	N	N	A
S1_46625867	A/C	1	46625867	+	NA	NA	NA	NA	NA	NA	A	A	A	A	A	A	N	N	N	A
S1_46721834	T/C	1	46721834	+	NA	NA	NA	NA	NA	NA	T	T	T	T	T	Y	C	C	C	Y
S1_46721841	T/A	1	46721841	+	NA	NA	NA	NA	NA	NA	T	T	T	T	T	W	A	A	A	W
S1_47698369	C/T	1	47698369	+	NA	NA	NA	NA	NA	NA	Y	C	Y	Y	C	Y	T	T	T	C
S1_47698411	G/A	1	47698411	+	NA	NA	NA	NA	NA	NA	R	G	R	R	G	R	A	A	A	G
S1_48024945	T/A	1	48024945	+	NA	NA	NA	NA	NA	NA	T	T	T	T	T	T	T	T	T	W
S1_48223474	C/T	1	48223474	+	NA	NA	NA	NA	NA	NA	C	C	C	N	C	C	N	N	N	C
S1_48419988	T/C	1	48419988	+	NA	NA	NA	NA	NA	NA	T	T	T	T	T	T	T	T	T	T
S1_48420036	T/C	1	48420036	+	NA	NA	NA	NA	NA	NA	T	T	N	T	T	T	T	T	T	N
S1_48420052	T/C	1	48420052	+	NA	NA	NA	NA	NA	NA	T	T	T	T	T	T	T	T	T	T
S1_48420054	T/C	1	48420054	+	NA	NA	NA	NA	NA	NA	T	T	T	T	T	T	T	T	T	T
S1_48420100	C/A	1	48420100	+	NA	NA	NA	NA	NA	NA	C	C	C	C	C	C	C	C	C	A
S1_48420101	A/T	1	48420101	+	NA	NA	NA	NA	NA	NA	A	A	A	A	A	A	A	A	A	A
S1_48420121	T/A	1	48420121	+	NA	NA	NA	NA	NA	NA	T	T	T	T	T	T	T	T	T	T
S1_48420178	A/G	1	48420178	+	NA	NA	NA	NA	NA	NA	A	A	A	A	A	A	A	A	A	G
S1_48498525	G/T	1	48498525	+	NA	NA	NA	NA	NA	NA	G	G	G	G	G	G	N	N	G	G
S1_48498530	T/G	1	48498530	+	NA	NA	NA	NA	NA	NA	T	T	T	T	T	T	N	N	T	T
S1_48498536	G/A	1	48498536	+	NA	NA	NA	NA	NA	NA	G	G	G	G	G	G	N	N	G	G
S1_48498539	T/C	1	48498539	+	NA	NA	NA	NA	NA	NA	C	C	C	C	Y	C	N	N	T	C
S1_48498560	A/G	1	48498560	+	NA	NA	NA	NA	NA	NA	A	A	A	A	A	A	N	N	A	A
S1_48523113	T/A	1	48523113	+	NA	NA	NA	NA	NA	NA	T	T	T	T	T	T	N	N	N	T
S1_48644157	G/C	1	48644157	+	NA	NA	NA	NA	NA	NA	G	G	G	G	G	G	G	G	G	G
S1_48644158	T/C	1	48644158	+	NA	NA	NA	NA	NA	NA	T	T	T	T	Y	T	Y	T	T	Y
S1_48644164	A/C	1	48644164	+	NA	NA	NA	NA	NA	NA	A	A	A	A	A	A	M	A	A	M
S1_48644165	A/T	1	48644165	+	NA	NA	NA	NA	NA	NA	A	A	A	A	A	A	W	A	A	W
S1_48644168	C/T	1	48644168	+	NA	NA	NA	NA	NA	NA	C	C	C	C	C	C	Y	C	C	Y
S1_49933546	T/C	1	49933546	+	NA	NA	NA	NA	NA	NA	T	T	N	T	T	T	N	N	N	T
S1_49971638	T/C	1	49971638	+	NA	NA	NA	NA	NA	NA	T	T	T	T	T	T	N	N	N	T
S1_49971722	A/G	1	49971722	+	NA	NA	NA	NA	NA	NA	A	A	A	N	A	A	N	N	N	A
S1_49994476	T/C	1	49994476	+	NA	NA	NA	NA	NA	NA	T	T	T	T	T	T	N	N	N	T
S1_50238920	G/A	1	50238920	+	NA	NA	NA	NA	NA	NA	N	R	G	A	R	A	N	N	N	R
S1_50238924	C/T	1	50238924	+	NA	NA	NA	NA	NA	NA	N	C	C	C	C	C	N	N	N	C
S1_50238959	C/T	1	50238959	+	NA	NA	NA	NA	NA	NA	N	Y	T	C	Y	C	N	N	N	Y
S1_50254410	T/C	1	50254410	+	NA	NA	NA	NA	NA	NA	T	T	T	T	T	T	N	N	N	T
S1_50264217	G/A	1	50264217	+	NA	NA	NA	NA	NA	NA	G	G	G	G	G	G	N	N	N	G
S1_50264261	A/C	1	50264261	+	NA	NA	NA	NA	NA	NA	A	M	M	A	A	M	A	M	A	A
S1_50264266	G/A	1	50264266	+	NA	NA	NA	NA	NA	NA	G	G	G	G	G	G	G	G	G	G
S1_50271630	C/G	1	50271630	+	NA	NA	NA	NA	NA	NA	C	N	N	N	N	N	N	N	N	N
S1_50789700	A/C	1	50789700	+	NA	NA	NA	NA	NA	NA	A	A	A	A	A	A	N	N	N	A
S1_50814510	G/A	1	50814510	+	NA	NA	NA	NA	NA	NA	R	R	R	R	A	A	N	N	N	A
S1_50852839	A/G	1	50852839	+	NA	NA	NA	NA	NA	NA	A	A	A	A	A	A	N	N	N	A
S1_50852911	T/C	1	50852911	+	NA	NA	NA	NA	NA	NA	T	T	T	N	T	T	N	N	N	T
S1_50852927	G/A	1	50852927	+	NA	NA	NA	NA	NA	NA	G	G	G	N	G	G	N	N	N	G
S1_51767236	C/T	1	51767236	+	NA	NA	NA	NA	NA	NA	Y	T	T	Y	Y	T	C	N	C	C
S1_51767272	C/T	1	51767272	+	NA	NA	NA	NA	NA	NA	C	C	C	C	C	C	C	C	C	C
S1_51767277	A/G	1	51767277	+	NA	NA	NA	NA	NA	NA	R	A	R	R	A	R	R	R	R	A
S1_51767281	C/A	1	51767281	+	NA	NA	NA	NA	NA	NA	C	C	C	M	M	C	M	C	M	M
S1_51767286	T/C	1	51767286	+	NA	NA	NA	NA	NA	NA	T	T	T	T	T	T	T	T	T	T
S1_51767293	A/G	1	51767293	+	NA	NA	NA	NA	NA	NA	R	A	R	A	A	R	R	A	A	A
S1_52015076	T/A	1	52015076	+	NA	NA	NA	NA	NA	NA	W	T	T	T	W	T	N	T	A	T
S1_52015078	C/T	1	52015078	+	NA	NA	NA	NA	NA	NA	Y	C	C	C	Y	C	N	C	T	C
S1_52015102	C/T	1	52015102	+	NA	NA	NA	NA	NA	NA	N	C	C	C	N	C	N	C	N	C
S1_52015105	A/G	1	52015105	+	NA	NA	NA	NA	NA	NA	A	R	R	A	A	R	N	A	A	A
S1_52015113	C/T	1	52015113	+	NA	NA	NA	NA	NA	NA	Y	C	C	C	Y	C	N	C	T	C
S1_52174108	A/T	1	52174108	+	NA	NA	NA	NA	NA	NA	A	A	A	A	A	A	N	N	N	N
S1_52174112	C/A	1	52174112	+	NA	NA	NA	NA	NA	NA	C	C	C	C	C	C	N	N	N	N
S1_52174144	C/T	1	52174144	+	NA	NA	NA	NA	NA	NA	C	C	C	C	C	C	N	N	N	N
S1_52349253	G/A	1	52349253	+	NA	NA	NA	NA	NA	NA	G	G	G	G	G	G	N	N	N	N
S1_52378138	T/C	1	52378138	+	NA	NA	NA	NA	NA	NA	T	N	N	N	N	N	N	N	N	N
S1_52378168	T/C	1	52378168	+	NA	NA	NA	NA	NA	NA	T	N	N	N	N	N	N	N	N	N
S1_52378177	C/A	1	52378177	+	NA	NA	NA	NA	NA	NA	C	N	N	N	N	N	N	N	N	N
S1_52729207	T/G	1	52729207	+	NA	NA	NA	NA	NA	NA	T	T	T	T	T	T	N	N	K	T
S1_54686971	A/G	1	54686971	+	NA	NA	NA	NA	NA	NA	A	A	A	A	A	A	A	A	A	A
S1_54686974	G/A	1	54686974	+	NA	NA	NA	NA	NA	NA	R	R	G	G	R	G	G	G	G	G
S1_54879476	T/C	1	54879476	+	NA	NA	NA	NA	NA	NA	T	T	T	T	T	N	N	N	N	T
S1_55206119	A/T	1	55206119	+	NA	NA	NA	NA	NA	NA	A	A	A	A	A	A	W	W	W	A
S1_55926379	G/T	1	55926379	+	NA	NA	NA	NA	NA	NA	G	G	G	G	G	G	N	G	N	G
S1_56191671	C/T	1	56191671	+	NA	NA	NA	NA	NA	NA	C	C	C	C	C	C	C	C	C	C
S1_56409129	A/G	1	56409129	+	NA	NA	NA	NA	NA	NA	A	A	N	A	N	N	N	N	N	A
S1_57081966	A/G	1	57081966	+	NA	NA	NA	NA	NA	NA	A	A	A	A	A	A	N	N	N	A
S1_57891256	C/T	1	57891256	+	NA	NA	NA	NA	NA	NA	C	C	C	C	C	C	N	N	N	C
S1_57891291	G/A	1	57891291	+	NA	NA	NA	NA	NA	NA	G	G	G	G	G	G	N	N	N	G
S1_58349562	A/G	1	58349562	+	NA	NA	NA	NA	NA	NA	A	A	A	A	A	A	N	N	N	A
S1_58535879	C/A	1	58535879	+	NA	NA	NA	NA	NA	NA	C	C	C	C	C	C	N	N	N	C
S1_58683430	T/A	1	58683430	+	NA	NA	NA	NA	NA	NA	T	T	T	N	T	T	T	T	T	T
S1_59373043	T/C	1	59373043	+	NA	NA	NA	NA	NA	NA	C	C	C	C	C	C	N	N	N	C
S1_59424317	A/T	1	59424317	+	NA	NA	NA	NA	NA	NA	A	A	A	A	A	W	T	T	T	W
S1_59424324	A/C	1	59424324	+	NA	NA	NA	NA	NA	NA	A	A	A	A	A	M	C	C	C	M
S1_59424405	A/T	1	59424405	+	NA	NA	NA	NA	NA	NA	A	N	A	A	N	T	T	T	T	W
S1_59424408	A/C	1	59424408	+	NA	NA	NA	NA	NA	NA	A	N	A	A	N	C	C	C	C	M
S1_59424410	A/T	1	59424410	+	NA	NA	NA	NA	NA	NA	A	N	A	A	N	T	T	T	T	W
S1_59424466	T/C	1	59424466	+	NA	NA	NA	NA	NA	NA	T	T	T	T	T	Y	C	C	C	Y
S1_59424467	T/A	1	59424467	+	NA	NA	NA	NA	NA	NA	T	T	T	T	T	W	A	A	A	W
S1_59424540	G/A	1	59424540	+	NA	NA	NA	NA	NA	NA	G	G	G	G	G	R	A	A	A	R
S1_59475872	A/G	1	59475872	+	NA	NA	NA	NA	NA	NA	A	A	A	A	R	A	A	A	A	A
S1_59475873	C/T	1	59475873	+	NA	NA	NA	NA	NA	NA	C	C	C	C	C	C	C	C	C	C
S1_59475877	A/C	1	59475877	+	NA	NA	NA	NA	NA	NA	A	A	A	A	A	A	A	A	A	A
S1_59475884	T/G	1	59475884	+	NA	NA	NA	NA	NA	NA	K	T	T	T	K	T	T	T	T	T
S1_59475912	T/C	1	59475912	+	NA	NA	NA	NA	NA	NA	Y	T	T	T	T	T	T	T	T	T
S1_59475925	A/T	1	59475925	+	NA	NA	NA	NA	NA	NA	W	A	A	A	A	A	A	A	A	A
S1_59707415	A/T	1	59707415	+	NA	NA	NA	NA	NA	NA	A	A	A	A	A	A	N	N	A	A
S1_59707448	C/T	1	59707448	+	NA	NA	NA	NA	NA	NA	Y	C	C	Y	Y	C	T	C	C	Y
S1_59707475	C/G	1	59707475	+	NA	NA	NA	NA	NA	NA	C	C	C	C	C	C	C	C	C	C
S1_60462731	A/T	1	60462731	+	NA	NA	NA	NA	NA	NA	T	T	T	N	T	T	N	N	N	T
S1_60462732	T/G	1	60462732	+	NA	NA	NA	NA	NA	NA	G	G	G	N	G	G	N	N	N	G
S1_60462740	T/C	1	60462740	+	NA	NA	NA	NA	NA	NA	C	C	C	N	C	C	N	N	N	C
S1_60462768	G/C	1	60462768	+	NA	NA	NA	NA	NA	NA	C	C	C	N	C	C	N	N	N	C
S1_61032453	A/T	1	61032453	+	NA	NA	NA	NA	NA	NA	W	W	W	W	W	W	W	W	W	W
S1_61032510	A/G	1	61032510	+	NA	NA	NA	NA	NA	NA	A	A	A	A	A	A	G	R	R	A
S1_61032569	G/A	1	61032569	+	NA	NA	NA	NA	NA	NA	R	G	G	G	G	G	G	G	G	G
S1_61032646	G/A	1	61032646	+	NA	NA	NA	NA	NA	NA	G	R	R	R	R	R	R	R	R	R
S1_61032651	C/T	1	61032651	+	NA	NA	NA	NA	NA	NA	C	C	Y	C	C	Y	C	Y	C	C
S1_61032657	T/C	1	61032657	+	NA	NA	NA	NA	NA	NA	Y	T	Y	Y	Y	T	T	T	T	T
S1_61032662	A/G	1	61032662	+	NA	NA	NA	NA	NA	NA	R	R	A	A	R	A	R	A	R	R
S1_61032682	C/T	1	61032682	+	NA	NA	NA	NA	NA	NA	C	Y	Y	Y	Y	Y	Y	Y	Y	Y
S1_61032711	G/A	1	61032711	+	NA	NA	NA	NA	NA	NA	G	R	R	R	R	R	R	R	R	R
S1_62509164	C/T	1	62509164	+	NA	NA	NA	NA	NA	NA	N	Y	C	C	C	Y	N	T	N	C
S1_62717694	C/T	1	62717694	+	NA	NA	NA	NA	NA	NA	C	C	C	C	C	C	C	C	C	C
S1_62717747	G/A	1	62717747	+	NA	NA	NA	NA	NA	NA	G	G	G	G	G	R	A	A	A	R
S1_63389551	T/A	1	63389551	+	NA	NA	NA	NA	NA	NA	T	T	T	T	T	W	A	A	A	W
S1_63397376	G/A	1	63397376	+	NA	NA	NA	NA	NA	NA	N	A	N	A	A	A	N	N	N	A
S1_63397388	A/G	1	63397388	+	NA	NA	NA	NA	NA	NA	N	A	N	A	A	A	N	N	N	A
S1_63418440	A/G	1	63418440	+	NA	NA	NA	NA	NA	NA	G	G	G	G	G	N	N	N	N	G
S1_63440646	T/C	1	63440646	+	NA	NA	NA	NA	NA	NA	Y	T	T	Y	T	T	T	T	T	T
S1_63440657	G/A	1	63440657	+	NA	NA	NA	NA	NA	NA	G	G	G	G	G	G	G	G	R	G
S1_63440660	T/C	1	63440660	+	NA	NA	NA	NA	NA	NA	T	T	T	T	T	T	T	T	Y	T
S1_63440683	C/T	1	63440683	+	NA	NA	NA	NA	NA	NA	C	C	C	C	C	C	C	C	Y	C
S1_63440689	G/A	1	63440689	+	NA	NA	NA	NA	NA	NA	R	G	G	G	G	R	G	G	G	G
S1_64017106	T/C	1	64017106	+	NA	NA	NA	NA	NA	NA	T	T	N	T	T	Y	C	C	C	Y
S1_64017120	G/A	1	64017120	+	NA	NA	NA	NA	NA	NA	G	G	N	G	G	R	A	A	A	R
S1_64017156	A/T	1	64017156	+	NA	NA	NA	NA	NA	NA	T	T	T	T	T	T	T	T	T	T
S1_64350411	G/T	1	64350411	+	NA	NA	NA	NA	NA	NA	G	G	G	G	G	G	G	G	G	G
S1_64350423	G/A	1	64350423	+	NA	NA	NA	NA	NA	NA	G	G	G	G	G	G	G	G	G	G
S1_64350434	A/T	1	64350434	+	NA	NA	NA	NA	NA	NA	A	A	A	A	A	A	A	A	A	A
S1_64350445	A/G	1	64350445	+	NA	NA	NA	NA	NA	NA	R	A	A	A	A	R	R	A	R	A
S1_64350452	A/G	1	64350452	+	NA	NA	NA	NA	NA	NA	R	R	R	R	R	R	R	R	R	R
S1_64995494	T/C	1	64995494	+	NA	NA	NA	NA	NA	NA	T	T	T	T	T	Y	Y	C	C	Y
S1_64995526	C/T	1	64995526	+	NA	NA	NA	NA	NA	NA	C	C	C	C	C	Y	Y	T	T	Y
S1_64995531	A/G	1	64995531	+	NA	NA	NA	NA	NA	NA	A	A	A	A	A	R	R	G	G	R
S1_64995561	G/A	1	64995561	+	NA	NA	NA	NA	NA	NA	A	A	A	A	A	A	N	N	N	A
S1_66427413	G/A	1	66427413	+	NA	NA	NA	NA	NA	NA	G	G	G	G	G	G	N	N	N	G
S1_66877218	T/C	1	66877218	+	NA	NA	NA	NA	NA	NA	T	T	N	Y	T	Y	Y	N	C	C
S1_66877260	A/G	1	66877260	+	NA	NA	NA	NA	NA	NA	A	A	A	A	A	A	A	A	A	A
S1_66877280	A/T	1	66877280	+	NA	NA	NA	NA	NA	NA	A	A	A	A	A	W	W	W	W	W
S1_66877283	A/T	1	66877283	+	NA	NA	NA	NA	NA	NA	A	A	A	A	A	A	A	A	A	A
S1_68746484	T/C	1	68746484	+	NA	NA	NA	NA	NA	NA	T	T	N	N	T	Y	N	T	T	T
S1_69531288	G/T	1	69531288	+	NA	NA	NA	NA	NA	NA	G	G	G	G	G	K	T	N	T	G
S1_69531308	C/T	1	69531308	+	NA	NA	NA	NA	NA	NA	C	C	C	C	C	Y	T	N	T	C
S1_69531317	C/T	1	69531317	+	NA	NA	NA	NA	NA	NA	C	C	C	C	C	Y	T	N	T	C
S1_69632891	T/A	1	69632891	+	NA	NA	NA	NA	NA	NA	T	T	T	T	T	T	N	N	N	N
S1_71688332	G/A	1	71688332	+	NA	NA	NA	NA	NA	NA	G	G	G	G	G	G	G	G	G	G
S1_71688346	G/A	1	71688346	+	NA	NA	NA	NA	NA	NA	G	G	G	G	G	G	G	G	G	G
S1_71688348	C/T	1	71688348	+	NA	NA	NA	NA	NA	NA	C	C	C	C	C	C	C	C	C	C
S1_71688353	G/T	1	71688353	+	NA	NA	NA	NA	NA	NA	G	G	G	G	G	G	G	G	G	G
S1_71763468	C/T	1	71763468	+	NA	NA	NA	NA	NA	NA	C	C	C	C	C	C	Y	C	C	C
S1_71763476	C/T	1	71763476	+	NA	NA	NA	NA	NA	NA	C	C	C	C	C	C	C	C	C	C
S1_71763521	T/A	1	71763521	+	NA	NA	NA	NA	NA	NA	T	T	T	T	T	T	T	T	T	T
S1_71763525	A/G	1	71763525	+	NA	NA	NA	NA	NA	NA	A	A	A	A	A	A	A	A	A	A
S1_71845137	G/A	1	71845137	+	NA	NA	NA	NA	NA	NA	R	R	G	R	R	R	R	R	R	R
S1_72304866	A/T	1	72304866	+	NA	NA	NA	NA	NA	NA	A	W	W	W	W	W	A	A	A	W
S1_72304872	A/G	1	72304872	+	NA	NA	NA	NA	NA	NA	G	R	R	R	R	R	G	G	G	R
S1_72304883	T/A	1	72304883	+	NA	NA	NA	NA	NA	NA	T	T	T	T	T	T	T	T	T	T
S1_72304888	C/T	1	72304888	+	NA	NA	NA	NA	NA	NA	T	Y	Y	Y	Y	Y	T	T	T	Y
S1_72304905	A/T	1	72304905	+	NA	NA	NA	NA	NA	NA	T	W	W	W	W	W	T	T	T	W
S1_72817290	C/T	1	72817290	+	NA	NA	NA	NA	NA	NA	C	C	C	C	C	C	N	N	N	C
S1_73024510	C/G	1	73024510	+	NA	NA	NA	NA	NA	NA	C	C	C	C	C	C	N	N	N	C
S1_73024539	C/T	1	73024539	+	NA	NA	NA	NA	NA	NA	C	C	C	C	C	C	N	N	N	C
S1_73024567	A/C	1	73024567	+	NA	NA	NA	NA	NA	NA	A	A	A	A	A	A	N	A	N	M
S1_73124102	G/T	1	73124102	+	NA	NA	NA	NA	NA	NA	G	G	N	G	G	G	G	G	G	G
S1_73269082	T/A	1	73269082	+	NA	NA	NA	NA	NA	NA	T	T	T	N	T	T	N	N	N	N
S1_74007497	C/T	1	74007497	+	NA	NA	NA	NA	NA	NA	N	C	C	N	Y	N	C	Y	T	Y
S1_74007516	G/A	1	74007516	+	NA	NA	NA	NA	NA	NA	N	G	G	N	R	N	G	R	A	R
S1_74007524	T/C	1	74007524	+	NA	NA	NA	NA	NA	NA	N	T	T	N	Y	N	T	Y	C	Y
S1_74179559	C/T	1	74179559	+	NA	NA	NA	NA	NA	NA	C	C	C	C	T	C	C	C	C	T
S1_74366797	G/C	1	74366797	+	NA	NA	NA	NA	NA	NA	S	G	G	S	S	S	N	N	N	G
S1_74574108	A/G	1	74574108	+	NA	NA	NA	NA	NA	NA	R	A	R	R	A	R	G	G	G	A
S1_74574124	G/A	1	74574124	+	NA	NA	NA	NA	NA	NA	R	G	R	R	G	R	A	A	A	G
S1_75053483	A/G	1	75053483	+	NA	NA	NA	NA	NA	NA	A	A	A	A	A	A	A	A	A	A
S1_76017141	G/A	1	76017141	+	NA	NA	NA	NA	NA	NA	G	G	G	G	G	G	N	G	N	G
S1_76017171	C/T	1	76017171	+	NA	NA	NA	NA	NA	NA	Y	Y	Y	Y	Y	Y	N	N	N	Y
S1_76119115	A/T	1	76119115	+	NA	NA	NA	NA	NA	NA	A	A	A	A	A	A	N	A	N	A
S1_76119136	T/A	1	76119136	+	NA	NA	NA	NA	NA	NA	T	T	T	T	T	T	N	T	N	T
S1_76119145	T/A	1	76119145	+	NA	NA	NA	NA	NA	NA	T	T	T	T	T	T	N	T	N	T
S1_77032581	T/C	1	77032581	+	NA	NA	NA	NA	NA	NA	T	T	T	T	Y	T	T	Y	C	T
S1_77032585	C/T	1	77032585	+	NA	NA	NA	NA	NA	NA	C	C	C	Y	Y	C	T	Y	C	C
S1_77032647	C/G	1	77032647	+	NA	NA	NA	NA	NA	NA	C	C	C	S	S	C	G	S	N	C
S1_77128788	C/T	1	77128788	+	NA	NA	NA	NA	NA	NA	C	C	C	C	C	C	N	N	N	C
S1_77128794	A/T	1	77128794	+	NA	NA	NA	NA	NA	NA	A	A	A	A	A	A	N	N	N	A
S1_77592164	T/G	1	77592164	+	NA	NA	NA	NA	NA	NA	T	T	T	T	T	T	N	T	N	T
S1_78370984	G/C	1	78370984	+	NA	NA	NA	NA	NA	NA	N	G	N	G	G	N	N	G	G	G
S1_78371029	C/T	1	78371029	+	NA	NA	NA	NA	NA	NA	N	Y	N	C	Y	N	N	N	T	Y
S1_78371051	A/G	1	78371051	+	NA	NA	NA	NA	NA	NA	N	A	N	A	A	N	N	N	A	A
S1_78371165	C/T	1	78371165	+	NA	NA	NA	NA	NA	NA	C	C	C	N	C	C	C	C	C	C
S1_78371180	C/T	1	78371180	+	NA	NA	NA	NA	NA	NA	C	C	C	N	C	C	C	C	C	C
S1_78371181	C/T	1	78371181	+	NA	NA	NA	NA	NA	NA	C	C	C	N	C	C	C	C	C	C
S1_78713854	G/T	1	78713854	+	NA	NA	NA	NA	NA	NA	K	K	K	K	K	K	N	N	N	K
S1_78934898	A/G	1	78934898	+	NA	NA	NA	NA	NA	NA	A	A	A	A	A	A	N	N	N	A
S1_79784059	G/A	1	79784059	+	NA	NA	NA	NA	NA	NA	G	G	G	G	G	G	N	N	N	G
S1_79784084	A/C	1	79784084	+	NA	NA	NA	NA	NA	NA	A	A	A	A	A	A	N	N	N	A
S1_80488919	G/A	1	80488919	+	NA	NA	NA	NA	NA	NA	G	G	G	G	G	G	G	R	R	G
S1_80683780	C/A	1	80683780	+	NA	NA	NA	NA	NA	NA	A	A	A	A	A	A	A	A	A	A
S1_80846267	G/A	1	80846267	+	NA	NA	NA	NA	NA	NA	R	G	G	R	R	G	A	G	N	R
S1_80846299	G/A	1	80846299	+	NA	NA	NA	NA	NA	NA	R	G	G	R	R	G	A	G	N	R
S1_80846358	C/G	1	80846358	+	NA	NA	NA	NA	NA	NA	C	N	C	N	C	C	G	N	N	C
S1_80846385	A/T	1	80846385	+	NA	NA	NA	NA	NA	NA	A	N	A	N	A	A	T	N	N	A
S1_80846397	A/C	1	80846397	+	NA	NA	NA	NA	NA	NA	A	A	A	A	A	A	A	N	A	A
S1_80846416	T/A	1	80846416	+	NA	NA	NA	NA	NA	NA	W	W	W	W	W	W	A	N	A	A
S1_80846417	A/C	1	80846417	+	NA	NA	NA	NA	NA	NA	M	M	M	M	M	M	C	N	C	C
S1_80846420	C/G	1	80846420	+	NA	NA	NA	NA	NA	NA	C	C	C	C	C	C	C	N	C	C
S1_80846424	G/A	1	80846424	+	NA	NA	NA	NA	NA	NA	G	G	G	G	G	G	G	N	G	G
S1_80846437	A/C	1	80846437	+	NA	NA	NA	NA	NA	NA	M	M	M	M	M	M	C	N	C	C
S1_81696268	A/C	1	81696268	+	NA	NA	NA	NA	NA	NA	M	M	M	M	M	M	C	M	M	M
S1_81696280	T/A	1	81696280	+	NA	NA	NA	NA	NA	NA	W	W	W	W	W	W	A	W	W	W
S1_81696286	C/T	1	81696286	+	NA	NA	NA	NA	NA	NA	C	C	C	C	C	Y	C	Y	Y	Y
S1_81803565	A/G	1	81803565	+	NA	NA	NA	NA	NA	NA	A	A	A	A	A	A	N	N	N	A
S1_81809804	A/C	1	81809804	+	NA	NA	NA	NA	NA	NA	A	M	A	A	M	A	N	C	C	M
S1_82411164	A/G	1	82411164	+	NA	NA	NA	NA	NA	NA	A	A	A	A	A	A	N	N	N	A
S1_82713097	G/T	1	82713097	+	NA	NA	NA	NA	NA	NA	G	G	G	G	G	G	G	G	G	G
S1_82844727	G/A	1	82844727	+	NA	NA	NA	NA	NA	NA	G	R	R	R	G	R	R	R	R	R
S1_82844737	T/A	1	82844737	+	NA	NA	NA	NA	NA	NA	T	W	W	W	T	W	W	W	W	W
S1_82844739	T/C	1	82844739	+	NA	NA	NA	NA	NA	NA	T	Y	T	Y	T	Y	Y	Y	T	T
S1_82844756	G/T	1	82844756	+	NA	NA	NA	NA	NA	NA	G	K	K	K	G	K	K	K	K	K
S1_82844774	A/T	1	82844774	+	NA	NA	NA	NA	NA	NA	A	W	A	W	A	W	W	W	A	A
S1_82844805	A/T	1	82844805	+	NA	NA	NA	NA	NA	NA	W	W	A	W	W	W	W	W	W	W
S1_83554845	C/A	1	83554845	+	NA	NA	NA	NA	NA	NA	C	C	C	C	C	C	N	N	N	C
S1_84409223	G/C	1	84409223	+	NA	NA	NA	NA	NA	NA	S	S	C	C	G	C	N	N	N	S
S1_84456654	C/T	1	84456654	+	NA	NA	NA	NA	NA	NA	C	Y	C	Y	Y	C	C	C	C	Y
S1_84456656	T/A	1	84456656	+	NA	NA	NA	NA	NA	NA	W	W	T	W	W	W	W	T	W	W
S1_84456659	T/A	1	84456659	+	NA	NA	NA	NA	NA	NA	T	W	T	W	W	T	T	T	T	W
S1_84920322	A/G	1	84920322	+	NA	NA	NA	NA	NA	NA	A	A	A	A	A	A	N	N	N	A
S1_85810389	T/C	1	85810389	+	NA	NA	NA	NA	NA	NA	T	N	T	T	T	T	N	N	N	T
S1_85810396	A/C	1	85810396	+	NA	NA	NA	NA	NA	NA	A	N	A	A	A	A	N	N	N	A
S1_86041985	G/A	1	86041985	+	NA	NA	NA	NA	NA	NA	G	G	G	G	G	G	G	G	G	G
S1_86041989	A/T	1	86041989	+	NA	NA	NA	NA	NA	NA	A	A	A	A	A	A	A	A	A	A
S1_86042032	G/T	1	86042032	+	NA	NA	NA	NA	NA	NA	G	G	G	G	G	G	G	G	G	G
S1_86042036	G/A	1	86042036	+	NA	NA	NA	NA	NA	NA	G	G	G	G	G	G	G	G	G	G
S1_86240104	G/A	1	86240104	+	NA	NA	NA	NA	NA	NA	G	N	N	G	A	G	G	N	N	A
S1_86240105	T/G	1	86240105	+	NA	NA	NA	NA	NA	NA	T	N	N	T	G	T	T	N	N	G
S1_86240189	A/T	1	86240189	+	NA	NA	NA	NA	NA	NA	A	A	A	A	A	A	N	N	N	A
S1_86240226	A/G	1	86240226	+	NA	NA	NA	NA	NA	NA	A	A	A	A	A	A	N	N	N	R
S1_86240230	G/A	1	86240230	+	NA	NA	NA	NA	NA	NA	G	R	G	G	G	G	N	N	N	R
S1_86240231	G/A	1	86240231	+	NA	NA	NA	NA	NA	NA	G	G	G	G	G	G	N	N	N	G
S1_86240244	T/G	1	86240244	+	NA	NA	NA	NA	NA	NA	T	N	T	T	T	T	N	N	N	K
S1_86240245	G/T	1	86240245	+	NA	NA	NA	NA	NA	NA	G	G	G	G	G	G	N	N	N	G
S1_86240286	C/T	1	86240286	+	NA	NA	NA	NA	NA	NA	C	C	C	C	C	C	C	C	C	C
S1_86329862	A/T	1	86329862	+	NA	NA	NA	NA	NA	NA	A	A	A	A	A	A	N	N	N	A
S1_86646263	C/T	1	86646263	+	NA	NA	NA	NA	NA	NA	C	C	C	C	C	C	C	C	C	C
S1_86646280	C/T	1	86646280	+	NA	NA	NA	NA	NA	NA	Y	Y	Y	C	Y	Y	C	C	C	C
S1_86982614	A/G	1	86982614	+	NA	NA	NA	NA	NA	NA	R	A	A	A	A	A	N	N	N	A
S1_86982639	A/G	1	86982639	+	NA	NA	NA	NA	NA	NA	R	A	A	A	A	A	N	N	N	A
S1_86982863	A/T	1	86982863	+	NA	NA	NA	NA	NA	NA	W	A	W	W	W	A	T	W	N	A
S1_86982875	C/T	1	86982875	+	NA	NA	NA	NA	NA	NA	Y	C	Y	Y	Y	C	T	Y	N	C
S1_86982901	C/A	1	86982901	+	NA	NA	NA	NA	NA	NA	M	C	C	C	C	C	C	C	N	C
S1_87168254	G/T	1	87168254	+	NA	NA	NA	NA	NA	NA	G	G	G	G	G	G	G	G	G	G
S1_87168269	T/C	1	87168269	+	NA	NA	NA	NA	NA	NA	T	T	T	T	T	T	T	T	T	T
S1_87584072	T/C	1	87584072	+	NA	NA	NA	NA	NA	NA	T	N	N	T	T	Y	N	N	N	T
S1_87740526	A/G	1	87740526	+	NA	NA	NA	NA	NA	NA	R	R	R	R	R	R	N	N	G	G
S1_87740540	A/G	1	87740540	+	NA	NA	NA	NA	NA	NA	R	R	R	R	R	R	N	N	G	G
S1_87740552	A/G	1	87740552	+	NA	NA	NA	NA	NA	NA	R	R	R	R	R	R	N	N	G	G
S1_87740561	G/A	1	87740561	+	NA	NA	NA	NA	NA	NA	R	R	R	R	R	R	N	N	A	A
S1_88528909	C/T	1	88528909	+	NA	NA	NA	NA	NA	NA	C	C	C	C	C	C	C	C	C	C
S1_88528953	T/G	1	88528953	+	NA	NA	NA	NA	NA	NA	T	T	T	T	T	T	T	T	T	T
S1_88693623	T/C	1	88693623	+	NA	NA	NA	NA	NA	NA	N	T	T	T	T	Y	C	C	C	Y
S1_88693702	C/T	1	88693702	+	NA	NA	NA	NA	NA	NA	C	C	C	C	C	Y	T	N	T	Y
S1_88693715	T/C	1	88693715	+	NA	NA	NA	NA	NA	NA	T	T	T	T	T	Y	C	N	C	Y
S1_88693750	T/C	1	88693750	+	NA	NA	NA	NA	NA	NA	T	T	T	T	T	Y	C	N	C	Y
S1_88939602	T/C	1	88939602	+	NA	NA	NA	NA	NA	NA	T	T	T	T	T	T	N	N	N	T
S1_88948611	T/A	1	88948611	+	NA	NA	NA	NA	NA	NA	T	N	T	N	T	T	N	N	N	T
S1_88948662	T/G	1	88948662	+	NA	NA	NA	NA	NA	NA	T	N	T	N	T	T	N	N	N	T
S1_89111933	T/G	1	89111933	+	NA	NA	NA	NA	NA	NA	K	T	N	T	T	T	N	N	N	T
S1_90404217	A/T	1	90404217	+	NA	NA	NA	NA	NA	NA	A	A	A	A	A	A	N	N	N	A
S1_90801914	A/G	1	90801914	+	NA	NA	NA	NA	NA	NA	N	A	N	A	N	N	N	N	N	N
S1_90801918	T/G	1	90801918	+	NA	NA	NA	NA	NA	NA	N	T	N	T	N	N	N	N	N	N
S1_90834439	G/A	1	90834439	+	NA	NA	NA	NA	NA	NA	R	R	R	R	R	R	R	R	R	R
S1_90834451	A/G	1	90834451	+	NA	NA	NA	NA	NA	NA	R	A	A	A	A	A	A	A	A	A
S1_90834473	A/T	1	90834473	+	NA	NA	NA	NA	NA	NA	W	A	A	A	A	A	A	A	A	A
S1_91345493	G/A	1	91345493	+	NA	NA	NA	NA	NA	NA	R	R	R	R	R	R	R	R	R	R
S1_91345495	G/A	1	91345495	+	NA	NA	NA	NA	NA	NA	R	R	R	R	R	R	R	R	R	R
S1_91345514	C/A	1	91345514	+	NA	NA	NA	NA	NA	NA	M	M	M	M	M	M	M	M	M	M
S1_91345520	C/A	1	91345520	+	NA	NA	NA	NA	NA	NA	M	M	M	M	M	M	M	M	M	M
S1_91697243	T/C	1	91697243	+	NA	NA	NA	NA	NA	NA	T	T	T	T	T	T	T	T	T	N
S1_91697252	A/G	1	91697252	+	NA	NA	NA	NA	NA	NA	A	A	A	A	A	A	A	A	A	N
S1_91730542	G/A	1	91730542	+	NA	NA	NA	NA	NA	NA	G	G	G	G	G	G	G	G	G	N
S1_91730577	G/T	1	91730577	+	NA	NA	NA	NA	NA	NA	G	G	G	G	G	G	G	G	G	N
S1_91984335	G/A	1	91984335	+	NA	NA	NA	NA	NA	NA	G	G	G	G	G	G	N	N	N	G
S1_91984373	C/T	1	91984373	+	NA	NA	NA	NA	NA	NA	C	C	C	C	C	C	N	N	N	C
S1_91984407	T/G	1	91984407	+	NA	NA	NA	NA	NA	NA	T	T	T	T	N	T	N	N	N	T
S1_92133448	A/T	1	92133448	+	NA	NA	NA	NA	NA	NA	W	A	A	T	A	A	A	A	A	W
S1_92133476	G/A	1	92133476	+	NA	NA	NA	NA	NA	NA	G	R	A	G	G	R	R	A	G	G
S1_92133478	G/A	1	92133478	+	NA	NA	NA	NA	NA	NA	G	R	A	G	G	R	R	A	G	G
S1_92133481	G/A	1	92133481	+	NA	NA	NA	NA	NA	NA	R	R	G	G	A	R	R	G	A	R
S1_92332628	A/T	1	92332628	+	NA	NA	NA	NA	NA	NA	A	A	A	A	A	T	T	W	T	W
S1_92918384	A/C	1	92918384	+	NA	NA	NA	NA	NA	NA	A	A	A	A	A	A	A	A	A	A
S1_93809081	C/A	1	93809081	+	NA	NA	NA	NA	NA	NA	C	C	C	C	C	M	A	A	A	M
S1_93809083	T/A	1	93809083	+	NA	NA	NA	NA	NA	NA	T	T	T	T	T	T	T	T	T	T
S1_93809088	A/T	1	93809088	+	NA	NA	NA	NA	NA	NA	A	A	A	A	A	A	N	N	N	A
S1_93809124	T/G	1	93809124	+	NA	NA	NA	NA	NA	NA	T	T	T	T	T	K	G	G	G	K
S1_93809889	C/A	1	93809889	+	NA	NA	NA	NA	NA	NA	C	C	C	C	C	C	N	N	N	C
S1_93809890	C/T	1	93809890	+	NA	NA	NA	NA	NA	NA	C	C	C	C	C	C	N	N	N	C
S1_93809899	A/C	1	93809899	+	NA	NA	NA	NA	NA	NA	A	A	A	A	A	A	N	N	N	A
S1_93809907	C/A	1	93809907	+	NA	NA	NA	NA	NA	NA	C	C	C	C	C	M	A	A	A	M
S1_93809908	A/C	1	93809908	+	NA	NA	NA	NA	NA	NA	A	A	A	A	A	M	C	C	C	M
S1_93809923	T/C	1	93809923	+	NA	NA	NA	NA	NA	NA	T	T	T	T	T	Y	C	C	C	Y
S1_93809936	A/G	1	93809936	+	NA	NA	NA	NA	NA	NA	A	A	A	A	A	A	N	N	N	A
S1_93809946	G/A	1	93809946	+	NA	NA	NA	NA	NA	NA	G	G	G	G	G	R	A	A	A	R
S1_93876327	G/A	1	93876327	+	NA	NA	NA	NA	NA	NA	G	G	G	G	G	R	A	N	A	R
S1_93876366	T/A	1	93876366	+	NA	NA	NA	NA	NA	NA	T	T	T	T	T	W	A	N	A	W
S1_93876368	A/G	1	93876368	+	NA	NA	NA	NA	NA	NA	A	A	A	A	A	R	G	N	G	R
S1_93876374	G/A	1	93876374	+	NA	NA	NA	NA	NA	NA	G	G	G	G	G	R	A	N	A	R
S1_93876400	C/A	1	93876400	+	NA	NA	NA	NA	NA	NA	C	C	C	C	C	M	A	A	A	M
S1_93876423	C/T	1	93876423	+	NA	NA	NA	NA	NA	NA	C	C	C	C	C	Y	T	T	T	Y
S1_94166335	A/C	1	94166335	+	NA	NA	NA	NA	NA	NA	A	A	A	A	A	A	N	N	N	N
S1_95238369	T/C	1	95238369	+	NA	NA	NA	NA	NA	NA	T	T	T	T	T	T	N	N	N	T
S1_95618003	A/T	1	95618003	+	NA	NA	NA	NA	NA	NA	T	A	A	A	A	W	A	A	A	A
S1_95618008	A/G	1	95618008	+	NA	NA	NA	NA	NA	NA	A	A	A	A	R	A	R	A	A	A
S1_96758323	A/T	1	96758323	+	NA	NA	NA	NA	NA	NA	A	A	A	A	A	A	A	A	A	A
S1_96758339	T/C	1	96758339	+	NA	NA	NA	NA	NA	NA	T	T	T	T	T	T	T	T	T	T
S1_96758350	C/T	1	96758350	+	NA	NA	NA	NA	NA	NA	C	C	C	C	C	C	C	C	C	C
S1_97132752	G/C	1	97132752	+	NA	NA	NA	NA	NA	NA	C	C	C	C	C	C	N	N	N	C
S1_97132765	C/T	1	97132765	+	NA	NA	NA	NA	NA	NA	T	T	T	T	T	T	N	N	N	T
S1_97427030	A/G	1	97427030	+	NA	NA	NA	NA	NA	NA	A	N	N	N	N	N	N	N	N	N
S1_97427056	T/C	1	97427056	+	NA	NA	NA	NA	NA	NA	T	N	N	N	N	N	N	N	N	N
S1_97455037	T/G	1	97455037	+	NA	NA	NA	NA	NA	NA	T	T	T	T	T	T	N	N	N	T
S1_97641652	G/A	1	97641652	+	NA	NA	NA	NA	NA	NA	G	G	G	G	G	R	A	A	A	R
S1_97641674	A/G	1	97641674	+	NA	NA	NA	NA	NA	NA	A	A	A	A	A	R	G	G	G	R
S1_97641676	A/G	1	97641676	+	NA	NA	NA	NA	NA	NA	A	A	A	A	A	R	G	G	G	R
S1_97641685	G/A	1	97641685	+	NA	NA	NA	NA	NA	NA	G	G	G	G	G	G	G	G	G	G
S1_97701165	C/T	1	97701165	+	NA	NA	NA	NA	NA	NA	Y	C	Y	Y	Y	Y	N	N	N	Y
S1_97701181	C/A	1	97701181	+	NA	NA	NA	NA	NA	NA	C	C	C	C	C	C	N	N	N	C
S1_98127340	A/G	1	98127340	+	NA	NA	NA	NA	NA	NA	A	G	G	G	G	G	A	A	A	R
S1_98127344	G/A	1	98127344	+	NA	NA	NA	NA	NA	NA	G	G	G	G	G	G	A	A	A	R
S1_98129336	T/A	1	98129336	+	NA	NA	NA	NA	NA	NA	T	N	N	N	A	A	W	A	A	A
S1_98204411	T/G	1	98204411	+	NA	NA	NA	NA	NA	NA	G	T	N	N	T	T	T	N	T	T
S1_98361666	G/T	1	98361666	+	NA	NA	NA	NA	NA	NA	T	N	N	N	N	N	N	N	N	N
S1_98361729	A/C	1	98361729	+	NA	NA	NA	NA	NA	NA	A	N	N	N	N	N	N	N	N	N
S1_98361730	C/G	1	98361730	+	NA	NA	NA	NA	NA	NA	G	N	N	N	N	N	N	N	N	N
S1_98607771	T/A	1	98607771	+	NA	NA	NA	NA	NA	NA	T	T	T	T	T	T	N	N	N	T
S1_99043847	T/A	1	99043847	+	NA	NA	NA	NA	NA	NA	T	T	T	T	T	T	N	N	N	T
S1_99043869	C/T	1	99043869	+	NA	NA	NA	NA	NA	NA	T	T	T	T	T	T	N	N	N	T
S1_99111212	A/G	1	99111212	+	NA	NA	NA	NA	NA	NA	A	A	A	A	A	R	G	G	G	R
S1_99111213	T/C	1	99111213	+	NA	NA	NA	NA	NA	NA	T	T	T	T	T	Y	C	C	C	Y
S1_99111219	T/G	1	99111219	+	NA	NA	NA	NA	NA	NA	G	G	G	G	G	K	T	T	T	K
S1_99111225	A/G	1	99111225	+	NA	NA	NA	NA	NA	NA	G	G	G	G	G	G	G	G	G	G
S1_99234169	A/G	1	99234169	+	NA	NA	NA	NA	NA	NA	A	A	A	A	A	A	A	A	A	A
S1_99234172	C/T	1	99234172	+	NA	NA	NA	NA	NA	NA	C	C	C	C	C	C	C	C	C	C
S1_99234180	A/G	1	99234180	+	NA	NA	NA	NA	NA	NA	G	G	G	G	R	R	G	G	A	G
S1_99234184	G/T	1	99234184	+	NA	NA	NA	NA	NA	NA	G	G	K	G	G	G	T	T	G	G
S1_99234192	G/T	1	99234192	+	NA	NA	NA	NA	NA	NA	G	G	G	G	G	G	G	G	G	G
S1_99234195	T/G	1	99234195	+	NA	NA	NA	NA	NA	NA	T	T	K	T	T	T	G	G	T	T
S1_99234200	A/C	1	99234200	+	NA	NA	NA	NA	NA	NA	A	A	M	A	A	A	C	C	A	A
S1_99234208	A/G	1	99234208	+	NA	NA	NA	NA	NA	NA	G	G	G	G	R	R	G	G	A	G
S1_99234216	G/T	1	99234216	+	NA	NA	NA	NA	NA	NA	G	G	G	G	G	G	G	G	G	G
S1_99234222	A/T	1	99234222	+	NA	NA	NA	NA	NA	NA	A	A	A	A	A	A	A	A	A	A
S1_99234225	A/T	1	99234225	+	NA	NA	NA	NA	NA	NA	A	A	W	A	A	A	T	T	A	A
S1_99670093	G/A	1	99670093	+	NA	NA	NA	NA	NA	NA	G	G	G	G	G	R	A	A	A	R
S1_99670113	T/A	1	99670113	+	NA	NA	NA	NA	NA	NA	T	T	T	T	T	W	A	A	A	W
S1_99823840	T/G	1	99823840	+	NA	NA	NA	NA	NA	NA	T	T	T	T	T	K	G	G	G	K
S1_99841464	G/A	1	99841464	+	NA	NA	NA	NA	NA	NA	G	G	G	G	G	G	A	A	A	R
S1_99841472	A/G	1	99841472	+	NA	NA	NA	NA	NA	NA	A	A	A	A	A	A	G	G	G	R
S1_99841492	T/G	1	99841492	+	NA	NA	NA	NA	NA	NA	T	T	T	T	T	K	G	G	G	K
S1_100153956	T/A	1	100153956	+	NA	NA	NA	NA	NA	NA	T	T	N	N	T	T	T	N	T	T
S1_100623644	A/C	1	100623644	+	NA	NA	NA	NA	NA	NA	A	A	M	A	A	A	N	N	N	A
S1_100767652	T/C	1	100767652	+	NA	NA	NA	NA	NA	NA	N	T	C	T	T	T	N	N	N	T
S1_101156539	A/T	1	101156539	+	NA	NA	NA	NA	NA	NA	W	W	W	W	W	W	W	W	W	W
S1_101156547	T/G	1	101156547	+	NA	NA	NA	NA	NA	NA	K	K	K	K	K	K	K	K	K	K
S1_101156555	C/G	1	101156555	+	NA	NA	NA	NA	NA	NA	S	S	S	S	S	S	S	S	S	S
S1_101156569	T/C	1	101156569	+	NA	NA	NA	NA	NA	NA	Y	Y	Y	Y	Y	Y	Y	Y	Y	Y
S1_101455979	A/T	1	101455979	+	NA	NA	NA	NA	NA	NA	A	A	A	A	A	A	N	N	N	A
S1_101829159	C/T	1	101829159	+	NA	NA	NA	NA	NA	NA	C	C	C	C	C	C	N	N	N	C
S1_101829184	G/C	1	101829184	+	NA	NA	NA	NA	NA	NA	G	G	G	G	G	G	N	N	N	G
S1_101981918	T/C	1	101981918	+	NA	NA	NA	NA	NA	NA	T	Y	Y	T	T	Y	Y	Y	T	T
S1_101981947	C/T	1	101981947	+	NA	NA	NA	NA	NA	NA	Y	Y	Y	Y	Y	Y	C	C	C	Y
S1_102164389	A/C	1	102164389	+	NA	NA	NA	NA	NA	NA	C	A	A	A	A	A	N	N	N	A
S1_102195710	A/G	1	102195710	+	NA	NA	NA	NA	NA	NA	N	A	A	A	A	A	N	N	N	A
S1_102314103	G/A	1	102314103	+	NA	NA	NA	NA	NA	NA	A	G	G	G	G	G	N	N	N	G
S1_102347353	T/C	1	102347353	+	NA	NA	NA	NA	NA	NA	T	T	T	T	T	T	C	N	C	T
S1_102347382	C/T	1	102347382	+	NA	NA	NA	NA	NA	NA	C	C	C	C	C	C	T	N	T	C
S1_102347398	G/A	1	102347398	+	NA	NA	NA	NA	NA	NA	G	R	A	A	A	A	N	N	N	A
S1_102439512	T/A	1	102439512	+	NA	NA	NA	NA	NA	NA	T	T	T	T	T	T	N	N	N	T
S1_102470129	T/A	1	102470129	+	NA	NA	NA	NA	NA	NA	W	A	A	A	A	A	A	A	A	A
S1_102470288	C/T	1	102470288	+	NA	NA	NA	NA	NA	NA	Y	Y	Y	Y	Y	Y	Y	Y	Y	Y
S1_102731875	T/A	1	102731875	+	NA	NA	NA	NA	NA	NA	N	T	T	T	T	T	T	T	T	T
S1_104248807	G/A	1	104248807	+	NA	NA	NA	NA	NA	NA	G	G	G	G	G	G	N	N	N	G
S1_104299011	T/C	1	104299011	+	NA	NA	NA	NA	NA	NA	T	T	T	T	T	T	N	N	N	T
S1_105084635	T/C	1	105084635	+	NA	NA	NA	NA	NA	NA	T	T	T	Y	T	Y	N	N	N	T
S1_105084643	G/A	1	105084643	+	NA	NA	NA	NA	NA	NA	A	G	G	G	G	G	N	N	N	G
S1_105440901	A/G	1	105440901	+	NA	NA	NA	NA	NA	NA	N	R	A	A	A	N	N	N	N	N
S1_105440944	A/G	1	105440944	+	NA	NA	NA	NA	NA	NA	R	A	R	A	A	R	R	A	R	A
S1_105440964	A/G	1	105440964	+	NA	NA	NA	NA	NA	NA	G	R	N	R	R	G	G	R	R	R
S1_105440972	G/T	1	105440972	+	NA	NA	NA	NA	NA	NA	G	K	N	K	K	G	G	K	K	K
S1_105440992	A/G	1	105440992	+	NA	NA	NA	NA	NA	NA	A	A	N	A	A	A	A	A	A	A
S1_105440998	T/A	1	105440998	+	NA	NA	NA	NA	NA	NA	A	W	N	W	W	A	A	W	W	W
S1_106883851	A/G	1	106883851	+	NA	NA	NA	NA	NA	NA	A	A	A	A	A	A	N	N	N	A
S1_106998121	T/G	1	106998121	+	NA	NA	NA	NA	NA	NA	T	T	T	T	T	T	N	N	N	T
S1_106998144	G/C	1	106998144	+	NA	NA	NA	NA	NA	NA	G	G	G	G	G	G	N	N	N	G
S1_107003148	T/G	1	107003148	+	NA	NA	NA	NA	NA	NA	N	T	T	T	T	T	N	N	N	T
S1_107279940	T/C	1	107279940	+	NA	NA	NA	NA	NA	NA	T	T	N	T	T	T	T	T	T	T
S1_107449529	T/C	1	107449529	+	NA	NA	NA	NA	NA	NA	T	T	T	T	T	T	T	T	T	T
S1_107449559	G/A	1	107449559	+	NA	NA	NA	NA	NA	NA	G	G	G	G	G	R	A	A	A	R
S1_107703731	A/C	1	107703731	+	NA	NA	NA	NA	NA	NA	A	A	N	A	A	A	A	A	A	A
S1_108203071	C/T	1	108203071	+	NA	NA	NA	NA	NA	NA	C	C	C	C	C	C	N	N	N	C
S1_108504602	C/T	1	108504602	+	NA	NA	NA	NA	NA	NA	C	C	C	C	C	C	N	C	N	C
S1_108504616	A/T	1	108504616	+	NA	NA	NA	NA	NA	NA	A	A	A	A	A	A	N	A	N	A
S1_108750760	A/G	1	108750760	+	NA	NA	NA	NA	NA	NA	A	A	A	A	A	A	N	N	N	A
S1_109322055	A/T	1	109322055	+	NA	NA	NA	NA	NA	NA	T	A	N	A	A	N	N	A	A	A
S1_109322062	T/G	1	109322062	+	NA	NA	NA	NA	NA	NA	G	T	N	T	T	N	N	T	T	T
S1_109330273	A/T	1	109330273	+	NA	NA	NA	NA	NA	NA	A	A	A	A	A	A	A	A	A	A
S1_109330275	G/A	1	109330275	+	NA	NA	NA	NA	NA	NA	G	R	G	G	R	R	G	G	R	R
S1_109330286	T/A	1	109330286	+	NA	NA	NA	NA	NA	NA	W	T	W	W	T	W	W	W	W	T
S1_109330304	A/G	1	109330304	+	NA	NA	NA	NA	NA	NA	R	A	R	R	A	R	R	R	R	A
S1_109330306	G/C	1	109330306	+	NA	NA	NA	NA	NA	NA	G	S	G	S	S	S	S	S	G	S
S1_109330308	T/C	1	109330308	+	NA	NA	NA	NA	NA	NA	Y	T	Y	Y	T	Y	Y	Y	Y	T
S1_109330310	A/G	1	109330310	+	NA	NA	NA	NA	NA	NA	A	A	A	A	A	A	A	A	A	A
S1_109330326	G/A	1	109330326	+	NA	NA	NA	NA	NA	NA	R	G	R	R	G	R	R	R	R	G
S1_109351186	C/T	1	109351186	+	NA	NA	NA	NA	NA	NA	C	T	N	T	T	T	N	N	N	T
S1_109351195	A/G	1	109351195	+	NA	NA	NA	NA	NA	NA	A	G	N	G	G	G	N	N	N	G
S1_109351268	T/C	1	109351268	+	NA	NA	NA	NA	NA	NA	T	T	T	N	T	T	N	N	N	T
S1_110082348	T/A	1	110082348	+	NA	NA	NA	NA	NA	NA	T	T	T	W	T	T	N	N	N	T
S1_110550227	A/C	1	110550227	+	NA	NA	NA	NA	NA	NA	A	N	A	A	A	A	A	N	A	N
S1_110550233	G/A	1	110550233	+	NA	NA	NA	NA	NA	NA	G	N	G	G	G	G	G	N	G	G
S1_110550234	A/G	1	110550234	+	NA	NA	NA	NA	NA	NA	A	N	A	R	A	A	R	N	A	A
S1_110550237	T/A	1	110550237	+	NA	NA	NA	NA	NA	NA	T	N	T	T	T	T	T	N	T	T
S1_110550240	C/T	1	110550240	+	NA	NA	NA	NA	NA	NA	Y	N	C	T	T	Y	Y	N	Y	Y
S1_110550265	G/A	1	110550265	+	NA	NA	NA	NA	NA	NA	G	N	G	G	G	G	G	N	G	G
S1_110793112	T/G	1	110793112	+	NA	NA	NA	NA	NA	NA	K	K	K	K	K	K	K	K	K	K
S1_110793128	C/T	1	110793128	+	NA	NA	NA	NA	NA	NA	Y	Y	Y	Y	Y	Y	Y	Y	Y	Y
S1_110793130	C/T	1	110793130	+	NA	NA	NA	NA	NA	NA	Y	Y	Y	Y	Y	Y	Y	Y	Y	Y
S1_110793190	T/G	1	110793190	+	NA	NA	NA	NA	NA	NA	T	T	T	T	K	T	T	T	T	K
S1_111269106	A/T	1	111269106	+	NA	NA	NA	NA	NA	NA	A	A	N	A	A	A	A	A	A	A
S1_111269108	A/C	1	111269108	+	NA	NA	NA	NA	NA	NA	A	M	N	A	A	A	A	A	A	A
S1_111269126	T/G	1	111269126	+	NA	NA	NA	NA	NA	NA	T	T	T	T	T	T	N	T	T	T
S1_111269127	G/T	1	111269127	+	NA	NA	NA	NA	NA	NA	G	G	G	K	G	K	K	K	K	G
S1_111269130	T/A	1	111269130	+	NA	NA	NA	NA	NA	NA	T	T	T	T	T	T	T	T	N	T
S1_112079990	A/C	1	112079990	+	NA	NA	NA	NA	NA	NA	M	M	M	M	M	M	M	A	M	M
S1_112079991	G/A	1	112079991	+	NA	NA	NA	NA	NA	NA	R	R	R	R	R	R	R	R	R	R
S1_113997153	T/C	1	113997153	+	NA	NA	NA	NA	NA	NA	T	T	T	T	T	T	N	N	N	T
S1_114053169	C/A	1	114053169	+	NA	NA	NA	NA	NA	NA	C	M	C	C	C	C	N	N	N	C
S1_114244605	T/G	1	114244605	+	NA	NA	NA	NA	NA	NA	T	T	T	T	T	T	T	T	T	T
S1_114704570	T/G	1	114704570	+	NA	NA	NA	NA	NA	NA	K	N	T	T	K	T	T	T	T	T
S1_116013402	T/G	1	116013402	+	NA	NA	NA	NA	NA	NA	T	T	N	T	T	T	N	N	N	T
S1_116567580	T/G	1	116567580	+	NA	NA	NA	NA	NA	NA	G	N	N	N	N	N	N	T	N	N
S1_116895877	C/T	1	116895877	+	NA	NA	NA	NA	NA	NA	C	T	T	T	T	T	N	N	N	Y
S1_117051861	A/G	1	117051861	+	NA	NA	NA	NA	NA	NA	A	A	A	N	A	A	N	N	N	A
S1_117090843	G/A	1	117090843	+	NA	NA	NA	NA	NA	NA	G	G	G	G	G	R	A	A	A	R
S1_117229542	G/C	1	117229542	+	NA	NA	NA	NA	NA	NA	G	G	N	G	G	G	N	G	N	G
S1_117229543	T/G	1	117229543	+	NA	NA	NA	NA	NA	NA	T	T	N	K	K	T	N	G	N	K
S1_117450555	A/G	1	117450555	+	NA	NA	NA	NA	NA	NA	A	A	A	A	A	R	G	G	R	R
S1_117450575	C/T	1	117450575	+	NA	NA	NA	NA	NA	NA	C	C	C	C	C	Y	T	T	Y	Y
S1_117450577	A/G	1	117450577	+	NA	NA	NA	NA	NA	NA	A	A	A	A	A	R	G	G	R	R
S1_117955821	A/G	1	117955821	+	NA	NA	NA	NA	NA	NA	A	A	N	A	A	A	N	N	N	A
S1_119437151	T/A	1	119437151	+	NA	NA	NA	NA	NA	NA	T	T	T	T	T	T	N	T	T	T
S1_119437187	G/A	1	119437187	+	NA	NA	NA	NA	NA	NA	G	G	G	G	G	G	N	G	G	G
S1_119512100	T/C	1	119512100	+	NA	NA	NA	NA	NA	NA	T	T	T	T	T	T	N	N	N	T
S1_119723854	T/C	1	119723854	+	NA	NA	NA	NA	NA	NA	T	N	N	N	T	N	Y	C	Y	T
S1_119723857	T/A	1	119723857	+	NA	NA	NA	NA	NA	NA	T	N	N	N	T	N	W	A	W	T
S1_119723870	G/C	1	119723870	+	NA	NA	NA	NA	NA	NA	G	N	N	N	G	N	S	C	S	G
S1_119723949	A/C	1	119723949	+	NA	NA	NA	NA	NA	NA	A	A	N	A	A	C	C	C	C	C
S1_119723963	T/C	1	119723963	+	NA	NA	NA	NA	NA	NA	T	T	N	T	T	T	T	T	T	T
S1_119920325	C/T	1	119920325	+	NA	NA	NA	NA	NA	NA	C	C	C	C	C	Y	T	T	T	Y
S1_119920353	C/T	1	119920353	+	NA	NA	NA	NA	NA	NA	C	C	C	C	C	C	C	C	C	C
S1_119920359	G/A	1	119920359	+	NA	NA	NA	NA	NA	NA	G	G	G	G	G	R	A	A	A	R
S1_119920362	T/G	1	119920362	+	NA	NA	NA	NA	NA	NA	T	T	T	T	T	K	G	G	G	K
S1_119920373	C/A	1	119920373	+	NA	NA	NA	NA	NA	NA	C	C	C	C	C	C	C	C	C	C
S1_119920375	A/G	1	119920375	+	NA	NA	NA	NA	NA	NA	A	A	A	A	A	R	G	G	G	R
S1_120328645	A/C	1	120328645	+	NA	NA	NA	NA	NA	NA	A	A	A	A	A	M	C	C	C	M
S1_121573323	G/C	1	121573323	+	NA	NA	NA	NA	NA	NA	C	G	G	G	G	G	N	N	N	G
S1_121573400	T/A	1	121573400	+	NA	NA	NA	NA	NA	NA	A	T	T	T	T	T	N	N	N	T
S1_121857128	G/T	1	121857128	+	NA	NA	NA	NA	NA	NA	K	K	K	K	K	K	K	G	K	K
S1_122071784	T/C	1	122071784	+	NA	NA	NA	NA	NA	NA	T	T	T	T	T	T	T	T	T	T
S1_122071833	G/T	1	122071833	+	NA	NA	NA	NA	NA	NA	G	G	K	G	G	G	G	G	G	G
S1_122071834	T/G	1	122071834	+	NA	NA	NA	NA	NA	NA	T	T	K	T	T	T	T	T	T	T
S1_122071836	G/T	1	122071836	+	NA	NA	NA	NA	NA	NA	G	G	K	G	G	G	G	G	G	G
S1_122071837	A/G	1	122071837	+	NA	NA	NA	NA	NA	NA	A	A	R	A	A	A	A	A	A	A
S1_122194102	G/C	1	122194102	+	NA	NA	NA	NA	NA	NA	G	G	G	G	G	S	C	C	C	S
S1_122194114	A/G	1	122194114	+	NA	NA	NA	NA	NA	NA	A	A	A	A	A	R	G	G	G	R
S1_122194127	C/T	1	122194127	+	NA	NA	NA	NA	NA	NA	C	C	C	C	C	Y	T	T	T	Y
S1_122194130	A/G	1	122194130	+	NA	NA	NA	NA	NA	NA	A	A	A	A	A	R	G	G	G	R
S1_122194154	T/C	1	122194154	+	NA	NA	NA	NA	NA	NA	T	T	T	T	T	T	N	N	N	T
S1_122491218	A/G	1	122491218	+	NA	NA	NA	NA	NA	NA	A	N	A	A	A	A	N	N	N	A
S1_122676979	T/C	1	122676979	+	NA	NA	NA	NA	NA	NA	T	T	T	T	T	Y	Y	Y	Y	T
S1_122676981	C/G	1	122676981	+	NA	NA	NA	NA	NA	NA	S	C	S	S	S	S	S	S	S	S
S1_122676983	G/A	1	122676983	+	NA	NA	NA	NA	NA	NA	R	R	R	R	R	R	R	R	R	R
S1_122676989	G/A	1	122676989	+	NA	NA	NA	NA	NA	NA	G	G	G	G	G	R	R	R	R	G
S1_122677004	C/T	1	122677004	+	NA	NA	NA	NA	NA	NA	Y	Y	Y	Y	Y	Y	Y	Y	Y	Y
S1_122863269	C/T	1	122863269	+	NA	NA	NA	NA	NA	NA	C	C	C	C	C	C	C	C	C	C
S1_122863282	A/T	1	122863282	+	NA	NA	NA	NA	NA	NA	A	A	A	A	A	A	A	A	A	A
S1_122863291	T/A	1	122863291	+	NA	NA	NA	NA	NA	NA	T	W	T	T	T	W	T	A	T	T
S1_122863300	A/C	1	122863300	+	NA	NA	NA	NA	NA	NA	A	A	A	A	A	A	A	A	A	A
S1_122863301	T/A	1	122863301	+	NA	NA	NA	NA	NA	NA	T	T	T	T	T	T	T	T	T	T
S1_122863304	C/A	1	122863304	+	NA	NA	NA	NA	NA	NA	C	M	C	C	C	M	C	A	C	C
S1_122961023	C/G	1	122961023	+	NA	NA	NA	NA	NA	NA	C	G	G	G	G	G	G	N	G	G
S1_122961033	T/G	1	122961033	+	NA	NA	NA	NA	NA	NA	T	G	G	G	G	K	T	N	T	K
S1_123420538	C/T	1	123420538	+	NA	NA	NA	NA	NA	NA	T	N	T	Y	Y	Y	T	T	C	N
S1_123848796	T/A	1	123848796	+	NA	NA	NA	NA	NA	NA	T	T	N	T	T	T	N	N	N	T
S1_123848852	G/T	1	123848852	+	NA	NA	NA	NA	NA	NA	K	G	K	K	G	T	T	N	T	N
S1_123848857	C/T	1	123848857	+	NA	NA	NA	NA	NA	NA	C	C	C	C	C	C	C	N	C	C
S1_123848868	T/C	1	123848868	+	NA	NA	NA	NA	NA	NA	T	T	T	T	T	T	T	N	T	T
S1_123848876	A/T	1	123848876	+	NA	NA	NA	NA	NA	NA	A	A	A	A	A	A	A	N	A	A
S1_124855531	G/A	1	124855531	+	NA	NA	NA	NA	NA	NA	G	G	G	G	G	G	N	N	N	G
S1_125291706	A/T	1	125291706	+	NA	NA	NA	NA	NA	NA	A	A	A	A	A	A	N	N	N	A
S1_125291759	C/A	1	125291759	+	NA	NA	NA	NA	NA	NA	C	C	C	C	C	C	N	N	N	C
S1_125291782	C/A	1	125291782	+	NA	NA	NA	NA	NA	NA	C	C	C	C	C	C	N	N	N	C
S1_125291786	A/G	1	125291786	+	NA	NA	NA	NA	NA	NA	A	A	A	A	A	R	N	N	N	A
S1_125829473	A/C	1	125829473	+	NA	NA	NA	NA	NA	NA	A	A	A	A	A	A	N	N	N	A
S1_125829492	C/G	1	125829492	+	NA	NA	NA	NA	NA	NA	C	C	C	C	C	C	N	N	N	C
S1_125829504	T/C	1	125829504	+	NA	NA	NA	NA	NA	NA	T	T	T	T	T	T	N	N	N	T
S1_126410964	G/A	1	126410964	+	NA	NA	NA	NA	NA	NA	G	G	G	G	G	G	G	G	N	G
S1_126421368	A/G	1	126421368	+	NA	NA	NA	NA	NA	NA	A	A	A	A	A	A	A	A	A	A
S1_127213956	C/G	1	127213956	+	NA	NA	NA	NA	NA	NA	S	S	S	S	S	S	C	C	C	S
S1_127213966	C/T	1	127213966	+	NA	NA	NA	NA	NA	NA	C	C	C	C	C	Y	T	T	T	C
S1_127263995	C/T	1	127263995	+	NA	NA	NA	NA	NA	NA	C	Y	Y	C	C	Y	T	T	N	C
S1_127368464	A/G	1	127368464	+	NA	NA	NA	NA	NA	NA	A	A	A	A	A	A	A	A	A	A
S1_127434993	C/T	1	127434993	+	NA	NA	NA	NA	NA	NA	C	Y	Y	Y	C	C	C	C	Y	C
S1_127435010	C/T	1	127435010	+	NA	NA	NA	NA	NA	NA	C	Y	Y	Y	Y	C	C	C	Y	Y
S1_127435011	T/G	1	127435011	+	NA	NA	NA	NA	NA	NA	T	K	K	K	K	T	T	T	K	K
S1_128647432	C/G	1	128647432	+	NA	NA	NA	NA	NA	NA	C	C	N	C	C	C	N	N	N	C
S1_128647467	A/G	1	128647467	+	NA	NA	NA	NA	NA	NA	A	A	N	A	A	A	N	N	N	A
S1_128889669	G/A	1	128889669	+	NA	NA	NA	NA	NA	NA	G	G	G	G	G	G	N	N	N	G
S1_129139326	A/T	1	129139326	+	NA	NA	NA	NA	NA	NA	A	A	A	A	A	W	T	T	T	A
S1_129139358	T/C	1	129139358	+	NA	NA	NA	NA	NA	NA	T	T	T	T	T	Y	C	C	C	T
S1_129139373	A/T	1	129139373	+	NA	NA	NA	NA	NA	NA	T	T	T	T	T	T	N	N	N	T
S1_129570774	A/T	1	129570774	+	NA	NA	NA	NA	NA	NA	A	A	T	A	A	A	A	N	N	A
S1_129570785	A/G	1	129570785	+	NA	NA	NA	NA	NA	NA	A	A	A	A	A	A	A	N	N	A
S1_129570787	A/G	1	129570787	+	NA	NA	NA	NA	NA	NA	A	A	A	A	A	A	A	N	N	A
S1_129570791	T/C	1	129570791	+	NA	NA	NA	NA	NA	NA	T	T	T	Y	T	T	T	N	N	T
S1_129570796	G/A	1	129570796	+	NA	NA	NA	NA	NA	NA	G	G	G	G	G	R	G	N	N	G
S1_129570805	T/A	1	129570805	+	NA	NA	NA	NA	NA	NA	T	T	T	T	T	T	T	N	N	T
S1_129570807	T/G	1	129570807	+	NA	NA	NA	NA	NA	NA	T	T	T	K	T	T	T	N	N	T
S1_129570808	T/C	1	129570808	+	NA	NA	NA	NA	NA	NA	Y	T	T	T	T	T	T	N	N	T
S1_129570810	T/C	1	129570810	+	NA	NA	NA	NA	NA	NA	T	T	T	Y	T	T	T	N	N	T
S1_129570812	G/T	1	129570812	+	NA	NA	NA	NA	NA	NA	G	G	G	G	G	G	G	N	N	G
S1_129570813	T/C	1	129570813	+	NA	NA	NA	NA	NA	NA	T	T	T	T	T	T	T	T	T	T
S1_129570814	A/T	1	129570814	+	NA	NA	NA	NA	NA	NA	T	W	W	T	W	T	W	W	T	W
S1_130410010	G/T	1	130410010	+	NA	NA	NA	NA	NA	NA	G	N	N	G	N	G	G	N	G	N
S1_130847064	A/T	1	130847064	+	NA	NA	NA	NA	NA	NA	A	A	A	A	A	A	N	N	N	A
S1_131106284	C/G	1	131106284	+	NA	NA	NA	NA	NA	NA	C	C	S	C	C	S	S	S	C	C
S1_131106304	G/A	1	131106304	+	NA	NA	NA	NA	NA	NA	G	G	R	R	G	R	R	R	G	G
S1_131106306	G/A	1	131106306	+	NA	NA	NA	NA	NA	NA	R	R	R	R	R	R	A	A	A	R
S1_131106307	G/C	1	131106307	+	NA	NA	NA	NA	NA	NA	S	S	S	S	S	S	C	C	C	S
S1_131790739	C/T	1	131790739	+	NA	NA	NA	NA	NA	NA	C	C	C	C	C	C	C	C	C	N
S1_131790759	T/G	1	131790759	+	NA	NA	NA	NA	NA	NA	G	T	T	T	K	T	K	T	T	N
S1_132325197	A/C	1	132325197	+	NA	NA	NA	NA	NA	NA	A	A	A	A	A	A	N	A	N	A
S1_132673051	C/T	1	132673051	+	NA	NA	NA	NA	NA	NA	N	C	C	N	N	C	N	C	C	N
S1_132673054	A/G	1	132673054	+	NA	NA	NA	NA	NA	NA	N	A	A	N	N	A	N	A	A	N
S1_132673069	G/A	1	132673069	+	NA	NA	NA	NA	NA	NA	N	G	G	N	N	G	N	G	G	N
S1_133002749	T/C	1	133002749	+	NA	NA	NA	NA	NA	NA	T	T	T	T	T	T	N	N	N	T
S1_133002761	A/G	1	133002761	+	NA	NA	NA	NA	NA	NA	A	A	A	A	A	A	N	N	N	A
S1_133002773	A/T	1	133002773	+	NA	NA	NA	NA	NA	NA	A	A	A	A	A	A	N	N	N	A
S1_133002777	C/T	1	133002777	+	NA	NA	NA	NA	NA	NA	C	T	T	T	T	Y	N	N	N	T
S1_133514359	A/G	1	133514359	+	NA	NA	NA	NA	NA	NA	A	A	A	A	A	A	N	N	N	A
S1_133628404	G/A	1	133628404	+	NA	NA	NA	NA	NA	NA	R	A	R	G	R	R	N	G	N	R
S1_133628412	A/G	1	133628412	+	NA	NA	NA	NA	NA	NA	R	G	R	A	R	R	N	A	N	R
S1_133628477	A/G	1	133628477	+	NA	NA	NA	NA	NA	NA	A	A	A	N	A	A	N	N	N	A
S1_133628481	G/T	1	133628481	+	NA	NA	NA	NA	NA	NA	K	K	K	N	K	T	N	N	N	K
S1_133628488	T/G	1	133628488	+	NA	NA	NA	NA	NA	NA	T	T	T	N	T	T	N	N	N	T
S1_133628489	C/G	1	133628489	+	NA	NA	NA	NA	NA	NA	C	C	C	N	S	S	N	N	N	C
S1_133628493	C/T	1	133628493	+	NA	NA	NA	NA	NA	NA	Y	Y	Y	N	Y	T	N	N	N	Y
S1_133628519	T/G	1	133628519	+	NA	NA	NA	NA	NA	NA	K	K	K	N	K	G	N	N	N	K
S1_133628520	A/G	1	133628520	+	NA	NA	NA	NA	NA	NA	R	R	R	N	R	G	N	N	N	R
S1_134155536	T/C	1	134155536	+	NA	NA	NA	NA	NA	NA	T	T	T	T	T	T	N	N	N	T
S1_134353777	T/C	1	134353777	+	NA	NA	NA	NA	NA	NA	T	T	T	T	T	T	T	Y	T	T
S1_134353781	A/G	1	134353781	+	NA	NA	NA	NA	NA	NA	A	A	A	A	A	A	A	A	A	A
S1_134598272	T/A	1	134598272	+	NA	NA	NA	NA	NA	NA	T	N	N	N	N	N	N	N	N	N
S1_135070381	T/C	1	135070381	+	NA	NA	NA	NA	NA	NA	T	T	T	T	T	T	T	T	T	T
S1_135504155	T/A	1	135504155	+	NA	NA	NA	NA	NA	NA	T	T	W	T	T	T	N	T	T	N
S1_135895909	G/A	1	135895909	+	NA	NA	NA	NA	NA	NA	R	G	G	R	R	G	R	G	G	R
S1_135895914	A/G	1	135895914	+	NA	NA	NA	NA	NA	NA	A	A	A	A	A	A	A	A	A	A
S1_135895915	C/A	1	135895915	+	NA	NA	NA	NA	NA	NA	C	M	M	M	M	M	M	M	M	M
S1_135895921	A/G	1	135895921	+	NA	NA	NA	NA	NA	NA	A	A	A	A	A	A	A	A	R	A
S1_135895951	C/T	1	135895951	+	NA	NA	NA	NA	NA	NA	C	C	C	C	C	C	C	C	C	C
S1_136041394	C/A	1	136041394	+	NA	NA	NA	NA	NA	NA	M	M	M	M	M	M	M	A	M	M
S1_137147505	G/A	1	137147505	+	NA	NA	NA	NA	NA	NA	A	G	G	G	G	G	N	N	N	G
S1_137147536	T/C	1	137147536	+	NA	NA	NA	NA	NA	NA	C	T	T	T	T	T	N	N	N	T
S1_137459526	C/T	1	137459526	+	NA	NA	NA	NA	NA	NA	Y	Y	Y	Y	Y	Y	Y	C	Y	Y
S1_137459647	G/T	1	137459647	+	NA	NA	NA	NA	NA	NA	G	G	G	G	G	G	G	G	G	G
S1_137641690	C/T	1	137641690	+	NA	NA	NA	NA	NA	NA	C	C	C	C	C	C	C	C	C	C
S1_137641711	A/G	1	137641711	+	NA	NA	NA	NA	NA	NA	A	A	A	A	A	A	A	A	A	A
S1_138045079	A/C	1	138045079	+	NA	NA	NA	NA	NA	NA	A	A	A	A	A	A	N	N	N	A
S1_138141032	C/T	1	138141032	+	NA	NA	NA	NA	NA	NA	C	C	C	N	C	C	N	N	N	C
S1_138141070	T/C	1	138141070	+	NA	NA	NA	NA	NA	NA	T	T	T	N	T	T	N	N	N	Y
S1_138682381	G/A	1	138682381	+	NA	NA	NA	NA	NA	NA	R	R	R	G	R	R	N	N	N	R
S1_138682445	C/A	1	138682445	+	NA	NA	NA	NA	NA	NA	C	A	A	A	A	A	N	N	N	A
S1_139883721	A/G	1	139883721	+	NA	NA	NA	NA	NA	NA	A	R	A	A	A	A	A	R	A	A
S1_139883727	A/T	1	139883727	+	NA	NA	NA	NA	NA	NA	W	W	W	W	A	A	A	A	A	A
S1_139883736	T/C	1	139883736	+	NA	NA	NA	NA	NA	NA	T	Y	T	T	T	Y	T	Y	T	T
S1_139883794	G/A	1	139883794	+	NA	NA	NA	NA	NA	NA	R	G	G	R	G	G	G	G	G	G
S1_139883795	T/C	1	139883795	+	NA	NA	NA	NA	NA	NA	T	T	T	T	T	Y	Y	Y	Y	Y
S1_139883970	T/A	1	139883970	+	NA	NA	NA	NA	NA	NA	N	N	T	N	A	T	N	N	T	T
S1_139883973	A/G	1	139883973	+	NA	NA	NA	NA	NA	NA	N	N	A	N	G	A	N	N	A	A
S1_139883974	T/A	1	139883974	+	NA	NA	NA	NA	NA	NA	N	N	T	N	T	T	N	N	T	T
S1_139883986	A/T	1	139883986	+	NA	NA	NA	NA	NA	NA	N	N	A	N	T	W	N	N	T	T
S1_139883987	T/G	1	139883987	+	NA	NA	NA	NA	NA	NA	N	N	T	N	G	K	N	N	T	G
S1_139883989	G/A	1	139883989	+	NA	NA	NA	NA	NA	NA	N	N	G	N	A	R	N	N	G	A
S1_139884001	G/A	1	139884001	+	NA	NA	NA	NA	NA	NA	N	N	G	N	G	R	N	N	G	G
S1_139884008	C/T	1	139884008	+	NA	NA	NA	NA	NA	NA	N	N	C	N	C	Y	N	N	C	C
S1_139884018	T/C	1	139884018	+	NA	NA	NA	NA	NA	NA	N	N	T	N	T	Y	N	N	T	T
S1_139890286	G/A	1	139890286	+	NA	NA	NA	NA	NA	NA	A	R	R	R	A	R	R	R	R	R
S1_139890289	A/G	1	139890289	+	NA	NA	NA	NA	NA	NA	G	R	R	R	G	R	R	R	R	R
S1_139890302	T/A	1	139890302	+	NA	NA	NA	NA	NA	NA	T	T	T	T	T	T	T	T	T	T
S1_139890308	C/T	1	139890308	+	NA	NA	NA	NA	NA	NA	C	C	C	C	C	C	C	C	C	C
S1_139890309	A/G	1	139890309	+	NA	NA	NA	NA	NA	NA	R	R	A	A	R	A	A	A	A	R
S1_139890310	T/A	1	139890310	+	NA	NA	NA	NA	NA	NA	T	T	T	T	T	T	T	T	T	T
S1_139890314	T/C	1	139890314	+	NA	NA	NA	NA	NA	NA	Y	Y	T	T	T	T	T	T	T	T
S1_139890349	A/G	1	139890349	+	NA	NA	NA	NA	NA	NA	R	R	A	A	R	A	A	A	A	R
S1_139890547	C/T	1	139890547	+	NA	NA	NA	NA	NA	NA	N	C	C	C	N	C	C	C	C	C
S1_140869211	A/G	1	140869211	+	NA	NA	NA	NA	NA	NA	G	G	G	G	G	G	N	N	N	G
S1_141297799	A/G	1	141297799	+	NA	NA	NA	NA	NA	NA	A	A	A	A	A	A	N	N	N	A
S1_141297800	T/C	1	141297800	+	NA	NA	NA	NA	NA	NA	T	T	T	T	T	T	N	N	N	T
S1_141297808	A/G	1	141297808	+	NA	NA	NA	NA	NA	NA	A	A	A	A	A	A	N	N	N	A
S1_141297839	G/A	1	141297839	+	NA	NA	NA	NA	NA	NA	G	G	G	G	G	R	A	A	A	G
S1_141297884	G/T	1	141297884	+	NA	NA	NA	NA	NA	NA	G	G	G	G	G	K	T	T	T	G
S1_141488655	T/A	1	141488655	+	NA	NA	NA	NA	NA	NA	W	T	W	T	W	W	A	A	A	W
S1_141488663	G/A	1	141488663	+	NA	NA	NA	NA	NA	NA	R	G	R	G	R	R	A	A	A	R
S1_141488664	C/G	1	141488664	+	NA	NA	NA	NA	NA	NA	S	C	S	C	S	S	G	G	G	S
S1_141488693	C/A	1	141488693	+	NA	NA	NA	NA	NA	NA	C	C	C	C	C	C	C	C	C	C
S1_141968968	A/G	1	141968968	+	NA	NA	NA	NA	NA	NA	A	A	A	A	A	A	A	N	N	A
S1_141968975	T/G	1	141968975	+	NA	NA	NA	NA	NA	NA	T	N	T	N	N	N	N	N	N	N
S1_141969004	G/A	1	141969004	+	NA	NA	NA	NA	NA	NA	G	N	G	N	N	N	N	N	N	N
S1_141969015	G/A	1	141969015	+	NA	NA	NA	NA	NA	NA	G	A	A	A	A	A	G	N	N	A
S1_143220442	T/G	1	143220442	+	NA	NA	NA	NA	NA	NA	T	T	N	T	T	T	T	T	T	T
S1_143878763	C/A	1	143878763	+	NA	NA	NA	NA	NA	NA	A	A	A	A	A	A	N	N	N	A
S1_143878765	A/T	1	143878765	+	NA	NA	NA	NA	NA	NA	A	A	A	A	A	A	N	N	N	A
S1_143878776	A/G	1	143878776	+	NA	NA	NA	NA	NA	NA	A	A	A	A	A	A	N	N	N	A
S1_143878781	A/T	1	143878781	+	NA	NA	NA	NA	NA	NA	A	A	A	A	A	A	N	N	N	A
S1_144604843	G/A	1	144604843	+	NA	NA	NA	NA	NA	NA	R	R	G	G	G	G	R	G	G	G
S1_144604852	A/T	1	144604852	+	NA	NA	NA	NA	NA	NA	A	A	A	A	A	A	A	A	A	A
S1_144604854	T/A	1	144604854	+	NA	NA	NA	NA	NA	NA	T	T	T	T	T	T	T	T	T	T
S1_144604858	A/T	1	144604858	+	NA	NA	NA	NA	NA	NA	W	W	W	W	W	W	W	W	W	W
S1_144604861	T/C	1	144604861	+	NA	NA	NA	NA	NA	NA	Y	Y	Y	Y	Y	Y	Y	Y	Y	Y
S1_144604882	A/T	1	144604882	+	NA	NA	NA	NA	NA	NA	A	A	A	A	A	A	N	A	A	A
S1_145111645	C/G	1	145111645	+	NA	NA	NA	NA	NA	NA	C	C	C	C	C	C	C	C	C	C
S1_146678136	C/T	1	146678136	+	NA	NA	NA	NA	NA	NA	C	N	N	C	C	Y	N	N	N	C
S1_147492023	T/C	1	147492023	+	NA	NA	NA	NA	NA	NA	T	N	N	N	N	C	C	C	C	C
S1_148517191	A/G	1	148517191	+	NA	NA	NA	NA	NA	NA	A	A	A	A	A	A	N	N	N	A
S1_148517221	C/A	1	148517221	+	NA	NA	NA	NA	NA	NA	C	C	C	C	C	C	N	N	N	C
S1_148517222	G/T	1	148517222	+	NA	NA	NA	NA	NA	NA	G	G	G	G	G	G	N	N	N	G
S1_148517224	T/G	1	148517224	+	NA	NA	NA	NA	NA	NA	T	T	T	N	T	T	N	N	N	T
S1_148517227	A/G	1	148517227	+	NA	NA	NA	NA	NA	NA	A	A	A	A	A	A	N	N	N	A
S1_148517228	A/T	1	148517228	+	NA	NA	NA	NA	NA	NA	A	A	A	A	A	A	N	N	N	A
S1_148517229	A/C	1	148517229	+	NA	NA	NA	NA	NA	NA	A	A	A	A	A	A	N	N	N	A
S1_148517230	A/G	1	148517230	+	NA	NA	NA	NA	NA	NA	A	A	A	A	A	A	N	N	N	A
S1_148517297	C/A	1	148517297	+	NA	NA	NA	NA	NA	NA	C	C	C	N	C	C	N	C	N	C
S1_148526954	T/C	1	148526954	+	NA	NA	NA	NA	NA	NA	C	T	C	N	Y	Y	T	N	T	T
S1_148526974	T/A	1	148526974	+	NA	NA	NA	NA	NA	NA	A	T	A	N	W	W	T	N	T	T
S1_148718930	G/T	1	148718930	+	NA	NA	NA	NA	NA	NA	G	G	G	G	G	G	G	G	G	G
S1_148719119	A/G	1	148719119	+	NA	NA	NA	NA	NA	NA	A	A	A	A	A	A	N	N	N	A
S1_148719121	T/C	1	148719121	+	NA	NA	NA	NA	NA	NA	Y	T	Y	Y	Y	Y	N	N	N	Y
S1_148719296	C/T	1	148719296	+	NA	NA	NA	NA	NA	NA	Y	C	Y	C	Y	C	C	C	C	C
S1_148719317	C/G	1	148719317	+	NA	NA	NA	NA	NA	NA	S	S	S	S	S	S	C	C	C	S
S1_148719326	A/G	1	148719326	+	NA	NA	NA	NA	NA	NA	R	A	R	A	R	A	A	A	A	A
S1_148719327	T/C	1	148719327	+	NA	NA	NA	NA	NA	NA	T	T	T	T	T	T	Y	Y	Y	T
S1_148719332	C/A	1	148719332	+	NA	NA	NA	NA	NA	NA	C	C	C	C	C	C	M	M	M	C
S1_148719353	G/A	1	148719353	+	NA	NA	NA	NA	NA	NA	G	G	G	G	G	G	A	A	A	G
S1_148719363	C/T	1	148719363	+	NA	NA	NA	NA	NA	NA	Y	Y	C	Y	Y	C	C	C	C	C
S1_148719374	C/A	1	148719374	+	NA	NA	NA	NA	NA	NA	C	C	M	M	C	C	C	C	C	C
S1_149373060	T/G	1	149373060	+	NA	NA	NA	NA	NA	NA	K	T	T	T	T	T	N	N	N	T
S1_149373065	T/A	1	149373065	+	NA	NA	NA	NA	NA	NA	W	T	T	T	T	T	N	N	N	T
S1_150101210	G/A	1	150101210	+	NA	NA	NA	NA	NA	NA	G	G	G	G	G	G	G	G	G	G
S1_150101219	G/A	1	150101219	+	NA	NA	NA	NA	NA	NA	G	G	G	G	G	R	A	A	A	R
S1_150752726	T/C	1	150752726	+	NA	NA	NA	NA	NA	NA	T	T	T	N	T	T	T	T	T	T
S1_151090327	G/T	1	151090327	+	NA	NA	NA	NA	NA	NA	K	K	T	G	K	K	K	N	G	K
S1_151090329	T/G	1	151090329	+	NA	NA	NA	NA	NA	NA	K	K	G	T	K	K	K	N	T	K
S1_152253322	C/T	1	152253322	+	NA	NA	NA	NA	NA	NA	C	C	C	C	C	Y	T	T	T	Y
S1_152253354	A/G	1	152253354	+	NA	NA	NA	NA	NA	NA	G	G	G	G	G	G	G	G	G	G
S1_152253372	T/C	1	152253372	+	NA	NA	NA	NA	NA	NA	C	C	C	Y	Y	C	Y	C	C	Y
S1_152253383	C/T	1	152253383	+	NA	NA	NA	NA	NA	NA	T	T	T	Y	Y	T	Y	T	T	Y
S1_152253399	A/G	1	152253399	+	NA	NA	NA	NA	NA	NA	A	A	A	R	R	A	R	A	A	R
S1_153281492	T/A	1	153281492	+	NA	NA	NA	NA	NA	NA	T	T	T	T	T	T	T	T	W	T
S1_153281563	A/C	1	153281563	+	NA	NA	NA	NA	NA	NA	A	A	A	A	A	A	A	A	A	A
S1_153633291	T/C	1	153633291	+	NA	NA	NA	NA	NA	NA	C	C	C	C	C	C	C	C	C	C
S1_153633295	G/A	1	153633295	+	NA	NA	NA	NA	NA	NA	G	G	G	G	G	G	G	G	G	G
S1_153633316	T/A	1	153633316	+	NA	NA	NA	NA	NA	NA	T	T	T	T	T	W	A	A	A	W
S1_153633329	G/C	1	153633329	+	NA	NA	NA	NA	NA	NA	G	G	G	G	G	G	G	G	G	G
S1_154088907	C/T	1	154088907	+	NA	NA	NA	NA	NA	NA	Y	C	C	C	C	C	C	C	C	C
S1_154088949	G/A	1	154088949	+	NA	NA	NA	NA	NA	NA	R	G	G	G	G	G	G	G	G	G
S1_154088955	A/T	1	154088955	+	NA	NA	NA	NA	NA	NA	W	A	A	A	A	A	A	A	A	A
S1_154136327	C/T	1	154136327	+	NA	NA	NA	NA	NA	NA	C	C	C	C	C	C	C	C	C	C
S1_154136329	C/T	1	154136329	+	NA	NA	NA	NA	NA	NA	C	C	C	C	C	C	C	C	C	C
S1_154136346	T/A	1	154136346	+	NA	NA	NA	NA	NA	NA	T	T	T	T	T	T	T	T	T	T
S1_154164006	A/G	1	154164006	+	NA	NA	NA	NA	NA	NA	A	N	N	A	A	A	N	N	N	A
S1_154524682	A/C	1	154524682	+	NA	NA	NA	NA	NA	NA	C	C	C	C	C	C	N	N	N	C
S1_154524906	A/T	1	154524906	+	NA	NA	NA	NA	NA	NA	N	N	N	N	A	A	A	A	A	A
S1_154524916	G/C	1	154524916	+	NA	NA	NA	NA	NA	NA	N	N	N	N	C	C	C	C	C	C
S1_154524917	G/C	1	154524917	+	NA	NA	NA	NA	NA	NA	N	N	N	N	N	C	C	C	C	N
S1_154525025	G/C	1	154525025	+	NA	NA	NA	NA	NA	NA	C	C	C	C	C	S	G	G	G	S
S1_154525038	T/A	1	154525038	+	NA	NA	NA	NA	NA	NA	T	T	T	T	T	W	A	A	A	W
S1_154525047	T/C	1	154525047	+	NA	NA	NA	NA	NA	NA	C	C	C	C	C	Y	T	T	T	Y
S1_154525051	G/T	1	154525051	+	NA	NA	NA	NA	NA	NA	T	T	T	T	T	K	G	G	G	K
S1_154553515	C/T	1	154553515	+	NA	NA	NA	NA	NA	NA	C	C	C	C	C	C	C	C	C	C
S1_154553532	C/A	1	154553532	+	NA	NA	NA	NA	NA	NA	C	C	C	C	C	M	M	M	C	C
S1_154553537	A/T	1	154553537	+	NA	NA	NA	NA	NA	NA	N	N	N	N	N	N	N	N	A	A
S1_154560641	A/G	1	154560641	+	NA	NA	NA	NA	NA	NA	R	R	N	R	A	A	A	N	A	A
S1_154560648	G/T	1	154560648	+	NA	NA	NA	NA	NA	NA	G	K	N	K	G	G	G	N	G	G
S1_155117933	A/G	1	155117933	+	NA	NA	NA	NA	NA	NA	A	N	A	A	A	A	N	N	N	N
S1_155117943	G/A	1	155117943	+	NA	NA	NA	NA	NA	NA	G	N	G	G	G	G	N	N	N	N
S1_155374674	G/T	1	155374674	+	NA	NA	NA	NA	NA	NA	G	G	G	N	K	G	N	N	N	N
S1_155374764	A/C	1	155374764	+	NA	NA	NA	NA	NA	NA	A	A	N	A	A	A	N	N	N	A
S1_155606018	C/T	1	155606018	+	NA	NA	NA	NA	NA	NA	C	Y	Y	C	C	Y	T	Y	N	C
S1_156218092	A/G	1	156218092	+	NA	NA	NA	NA	NA	NA	A	A	N	A	A	A	N	N	N	A
S1_156218112	T/C	1	156218112	+	NA	NA	NA	NA	NA	NA	T	T	N	T	T	T	N	N	N	T
S1_156221024	G/C	1	156221024	+	NA	NA	NA	NA	NA	NA	G	G	G	G	G	G	N	N	N	G
S1_156221077	C/T	1	156221077	+	NA	NA	NA	NA	NA	NA	Y	Y	T	Y	Y	Y	T	T	T	Y
S1_156221097	G/A	1	156221097	+	NA	NA	NA	NA	NA	NA	R	R	A	R	R	R	A	A	A	R
S1_156221101	T/A	1	156221101	+	NA	NA	NA	NA	NA	NA	W	W	A	W	W	W	A	A	A	W
S1_158518614	T/C	1	158518614	+	NA	NA	NA	NA	NA	NA	T	N	T	N	T	T	T	T	T	T
S1_158888752	G/A	1	158888752	+	NA	NA	NA	NA	NA	NA	R	G	R	R	G	G	N	A	N	R
S1_159016832	C/G	1	159016832	+	NA	NA	NA	NA	NA	NA	C	C	C	C	C	C	C	C	C	C
S1_159385683	A/T	1	159385683	+	NA	NA	NA	NA	NA	NA	T	N	N	T	T	N	T	N	N	T
S1_159385695	A/G	1	159385695	+	NA	NA	NA	NA	NA	NA	A	N	N	A	A	N	A	N	N	A
S1_159950773	T/G	1	159950773	+	NA	NA	NA	NA	NA	NA	T	T	T	T	T	T	T	T	T	T
S1_159950779	A/G	1	159950779	+	NA	NA	NA	NA	NA	NA	A	A	A	A	A	A	A	A	A	A
S1_160452744	A/C	1	160452744	+	NA	NA	NA	NA	NA	NA	A	A	N	N	A	A	A	A	N	A
S1_160501123	T/C	1	160501123	+	NA	NA	NA	NA	NA	NA	T	T	T	T	T	Y	T	N	T	N
S1_160501125	T/C	1	160501125	+	NA	NA	NA	NA	NA	NA	T	T	T	T	T	T	T	N	T	N
S1_164237178	A/T	1	164237178	+	NA	NA	NA	NA	NA	NA	A	A	A	A	A	A	A	A	A	A
S1_164237182	T/C	1	164237182	+	NA	NA	NA	NA	NA	NA	T	T	T	T	T	T	T	T	T	T
S1_164237186	A/T	1	164237186	+	NA	NA	NA	NA	NA	NA	A	A	A	W	A	A	A	A	A	A
S1_164237189	G/A	1	164237189	+	NA	NA	NA	NA	NA	NA	G	R	G	R	R	R	A	A	A	A
S1_164237194	A/T	1	164237194	+	NA	NA	NA	NA	NA	NA	A	W	A	W	W	W	T	T	T	T
S1_164237231	T/A	1	164237231	+	NA	NA	NA	NA	NA	NA	T	T	T	T	T	T	T	T	T	T
S1_166531545	T/C	1	166531545	+	NA	NA	NA	NA	NA	NA	T	C	C	C	C	C	C	C	C	C
S1_166531558	A/G	1	166531558	+	NA	NA	NA	NA	NA	NA	A	A	A	A	A	A	G	G	A	A
S1_166763832	A/G	1	166763832	+	NA	NA	NA	NA	NA	NA	A	A	A	A	R	R	R	R	R	R
S1_166763845	A/G	1	166763845	+	NA	NA	NA	NA	NA	NA	A	A	A	A	A	A	A	A	A	A
S1_166763850	G/C	1	166763850	+	NA	NA	NA	NA	NA	NA	G	S	S	G	G	S	S	G	G	G
S1_166763851	C/A	1	166763851	+	NA	NA	NA	NA	NA	NA	C	C	C	C	C	C	C	C	C	C
S1_166763854	T/C	1	166763854	+	NA	NA	NA	NA	NA	NA	Y	T	Y	Y	T	Y	T	T	T	T
S1_166763863	T/A	1	166763863	+	NA	NA	NA	NA	NA	NA	W	T	W	W	T	W	T	T	T	T
S1_168166023	G/A	1	168166023	+	NA	NA	NA	NA	NA	NA	A	G	A	G	G	R	A	A	G	G
S1_169589742	C/G	1	169589742	+	NA	NA	NA	NA	NA	NA	G	G	G	G	G	G	G	G	G	G
S1_169838892	A/T	1	169838892	+	NA	NA	NA	NA	NA	NA	A	A	A	A	A	A	A	A	A	A
S1_169838909	T/G	1	169838909	+	NA	NA	NA	NA	NA	NA	T	T	T	T	T	T	T	T	T	T
S1_169839041	T/G	1	169839041	+	NA	NA	NA	NA	NA	NA	T	T	T	T	T	T	T	T	T	T
S1_169839047	T/C	1	169839047	+	NA	NA	NA	NA	NA	NA	T	T	T	T	T	T	T	T	T	T
S1_170201426	G/A	1	170201426	+	NA	NA	NA	NA	NA	NA	G	G	G	G	G	G	G	G	G	G
S1_170201499	A/C	1	170201499	+	NA	NA	NA	NA	NA	NA	A	A	A	A	A	A	A	A	A	A
S1_173527665	C/T	1	173527665	+	NA	NA	NA	NA	NA	NA	C	Y	Y	C	Y	C	C	C	C	C
S1_175360087	G/A	1	175360087	+	NA	NA	NA	NA	NA	NA	G	G	N	G	G	G	G	G	G	G
S1_175685440	G/C	1	175685440	+	NA	NA	NA	NA	NA	NA	N	N	G	G	G	G	G	N	G	G
S1_175685447	C/T	1	175685447	+	NA	NA	NA	NA	NA	NA	N	N	C	C	C	C	C	N	C	C
S1_175958610	C/T	1	175958610	+	NA	NA	NA	NA	NA	NA	C	C	Y	C	C	Y	Y	Y	C	Y
S1_175958635	G/C	1	175958635	+	NA	NA	NA	NA	NA	NA	S	S	S	S	S	S	S	S	S	S
S1_175958722	T/A	1	175958722	+	NA	NA	NA	NA	NA	NA	T	T	T	T	T	T	T	T	T	T
S1_175958802	A/G	1	175958802	+	NA	NA	NA	NA	NA	NA	R	R	G	A	G	G	R	G	R	R
S1_175958803	A/G	1	175958803	+	NA	NA	NA	NA	NA	NA	A	A	A	A	A	A	A	A	A	A
S2_1146013	C/T	2	1146013	+	NA	NA	NA	NA	NA	NA	C	T	T	C	C	Y	N	N	C	C
S2_1216808	C/T	2	1216808	+	NA	NA	NA	NA	NA	NA	T	C	C	C	T	T	C	C	C	T
S2_1598926	C/T	2	1598926	+	NA	NA	NA	NA	NA	NA	C	C	C	C	C	C	C	C	C	C
S2_1598938	T/C	2	1598938	+	NA	NA	NA	NA	NA	NA	T	T	T	T	T	Y	T	T	T	T
S2_1598949	T/C	2	1598949	+	NA	NA	NA	NA	NA	NA	T	T	T	T	T	T	T	T	T	T
S2_1598953	A/C	2	1598953	+	NA	NA	NA	NA	NA	NA	A	A	A	A	A	A	A	A	A	A
S2_1598988	T/C	2	1598988	+	NA	NA	NA	NA	NA	NA	T	T	T	T	T	T	T	T	T	T
S2_1599024	C/T	2	1599024	+	NA	NA	NA	NA	NA	NA	C	T	T	C	C	T	T	T	C	C
S2_1844956	T/G	2	1844956	+	NA	NA	NA	NA	NA	NA	T	T	T	T	T	T	T	T	T	T
S2_2623530	A/G	2	2623530	+	NA	NA	NA	NA	NA	NA	R	A	R	R	A	R	A	R	A	A
S2_2623560	C/T	2	2623560	+	NA	NA	NA	NA	NA	NA	Y	Y	Y	Y	Y	Y	Y	Y	Y	Y
S2_2623564	A/G	2	2623564	+	NA	NA	NA	NA	NA	NA	R	R	R	R	R	R	R	R	R	R
S2_2623569	A/G	2	2623569	+	NA	NA	NA	NA	NA	NA	A	A	A	A	A	A	A	A	A	A
S2_2623578	T/G	2	2623578	+	NA	NA	NA	NA	NA	NA	K	K	T	K	K	T	K	T	T	T
S2_2623580	A/G	2	2623580	+	NA	NA	NA	NA	NA	NA	A	A	A	A	A	A	A	A	A	A
S2_3536895	A/C	2	3536895	+	NA	NA	NA	NA	NA	NA	A	M	M	A	A	M	A	M	A	A
S2_3536897	T/A	2	3536897	+	NA	NA	NA	NA	NA	NA	T	W	W	T	T	W	T	W	T	T
S2_3536919	C/T	2	3536919	+	NA	NA	NA	NA	NA	NA	C	T	T	C	C	Y	C	T	C	C
S2_3536942	G/C	2	3536942	+	NA	NA	NA	NA	NA	NA	G	S	S	G	G	S	G	S	G	G
S2_3749958	C/A	2	3749958	+	NA	NA	NA	NA	NA	NA	C	C	C	C	C	M	C	C	C	C
S2_3749974	C/A	2	3749974	+	NA	NA	NA	NA	NA	NA	C	C	C	C	C	C	C	C	C	C
S2_3749980	A/G	2	3749980	+	NA	NA	NA	NA	NA	NA	A	A	A	A	A	A	A	A	A	A
S2_3749982	G/A	2	3749982	+	NA	NA	NA	NA	NA	NA	G	G	G	G	G	R	G	G	G	G
S2_3750010	T/G	2	3750010	+	NA	NA	NA	NA	NA	NA	T	T	T	T	T	K	T	T	T	T
S2_4331576	A/G	2	4331576	+	NA	NA	NA	NA	NA	NA	A	A	A	A	A	A	A	N	A	A
S2_4997596	G/A	2	4997596	+	NA	NA	NA	NA	NA	NA	A	A	A	A	A	A	A	A	A	A
S2_4997607	G/A	2	4997607	+	NA	NA	NA	NA	NA	NA	A	A	A	A	A	A	A	A	A	A
S2_5035760	C/A	2	5035760	+	NA	NA	NA	NA	NA	NA	C	N	N	C	C	N	C	N	C	C
S2_5035773	G/A	2	5035773	+	NA	NA	NA	NA	NA	NA	G	N	N	G	G	N	G	N	G	G
S2_5035806	T/C	2	5035806	+	NA	NA	NA	NA	NA	NA	T	T	T	T	Y	T	T	T	T	T
S2_5035807	G/A	2	5035807	+	NA	NA	NA	NA	NA	NA	G	G	G	G	G	R	G	R	G	G
S2_5035832	C/T	2	5035832	+	NA	NA	NA	NA	NA	NA	C	C	C	C	C	C	C	C	C	C
S2_5035849	A/C	2	5035849	+	NA	NA	NA	NA	NA	NA	M	M	M	M	M	M	M	M	M	M
S2_5035914	A/G	2	5035914	+	NA	NA	NA	NA	NA	NA	A	A	A	A	A	A	A	A	A	A
S2_5035960	A/T	2	5035960	+	NA	NA	NA	NA	NA	NA	A	A	A	A	A	A	A	A	A	A
S2_5035961	T/C	2	5035961	+	NA	NA	NA	NA	NA	NA	T	T	T	T	T	T	T	T	T	T
S2_5561061	T/C	2	5561061	+	NA	NA	NA	NA	NA	NA	N	T	N	N	C	N	C	N	N	T
S2_5561071	C/T	2	5561071	+	NA	NA	NA	NA	NA	NA	N	N	N	N	T	N	T	N	N	N
S2_5561080	A/C	2	5561080	+	NA	NA	NA	NA	NA	NA	N	A	N	N	C	N	C	N	N	A
S2_5695336	A/G	2	5695336	+	NA	NA	NA	NA	NA	NA	A	A	N	A	A	A	A	A	A	A
S2_7512242	T/A	2	7512242	+	NA	NA	NA	NA	NA	NA	T	T	T	T	T	T	W	W	T	T
S2_7512249	A/G	2	7512249	+	NA	NA	NA	NA	NA	NA	R	A	A	A	A	R	A	A	R	A
S2_7512279	T/C	2	7512279	+	NA	NA	NA	NA	NA	NA	T	T	Y	T	T	T	Y	T	T	T
S2_7702316	T/G	2	7702316	+	NA	NA	NA	NA	NA	NA	K	N	G	T	K	T	T	T	T	K
S2_7702331	G/T	2	7702331	+	NA	NA	NA	NA	NA	NA	K	N	G	T	K	T	T	G	K	K
S2_8672781	C/A	2	8672781	+	NA	NA	NA	NA	NA	NA	M	M	M	M	M	M	M	C	M	M
S2_9539564	G/T	2	9539564	+	NA	NA	NA	NA	NA	NA	G	G	G	G	G	G	G	G	G	G
S2_9539569	T/A	2	9539569	+	NA	NA	NA	NA	NA	NA	T	T	T	T	T	T	T	T	T	T
S2_9539583	A/G	2	9539583	+	NA	NA	NA	NA	NA	NA	A	A	A	A	A	A	A	A	A	A
S2_9539661	C/T	2	9539661	+	NA	NA	NA	NA	NA	NA	C	C	N	N	C	C	C	C	C	C
S2_9539667	C/T	2	9539667	+	NA	NA	NA	NA	NA	NA	C	C	N	N	C	C	C	C	C	C
S2_9539670	A/G	2	9539670	+	NA	NA	NA	NA	NA	NA	A	A	N	N	A	A	A	A	A	A
S2_9539693	A/G	2	9539693	+	NA	NA	NA	NA	NA	NA	A	A	N	N	A	A	A	A	A	A
S2_9565510	A/G	2	9565510	+	NA	NA	NA	NA	NA	NA	R	N	A	R	R	G	R	A	A	A
S2_9861253	G/A	2	9861253	+	NA	NA	NA	NA	NA	NA	G	G	G	G	G	G	G	G	G	G
S2_9861262	C/G	2	9861262	+	NA	NA	NA	NA	NA	NA	C	C	C	C	C	C	C	C	C	C
S2_10075326	A/C	2	10075326	+	NA	NA	NA	NA	NA	NA	A	C	C	A	A	C	A	C	A	A
S2_10756255	A/G	2	10756255	+	NA	NA	NA	NA	NA	NA	G	G	G	G	G	G	G	N	G	G
S2_10917109	G/T	2	10917109	+	NA	NA	NA	NA	NA	NA	T	G	G	T	K	T	G	G	T	T
S2_10917140	C/T	2	10917140	+	NA	NA	NA	NA	NA	NA	T	C	C	T	Y	T	C	C	T	T
S2_10981765	T/C	2	10981765	+	NA	NA	NA	NA	NA	NA	T	T	T	T	T	T	T	T	T	T
S2_11417528	T/A	2	11417528	+	NA	NA	NA	NA	NA	NA	T	T	T	T	T	T	T	T	T	T
S2_11417604	A/G	2	11417604	+	NA	NA	NA	NA	NA	NA	A	A	A	A	A	A	A	A	A	A
S2_12365229	C/T	2	12365229	+	NA	NA	NA	NA	NA	NA	C	C	C	C	C	C	C	C	C	C
S2_12365270	T/C	2	12365270	+	NA	NA	NA	NA	NA	NA	T	T	T	T	T	T	T	T	T	T
S2_13090001	T/G	2	13090001	+	NA	NA	NA	NA	NA	NA	K	G	K	T	T	G	K	T	K	K
S2_13329364	A/G	2	13329364	+	NA	NA	NA	NA	NA	NA	R	R	R	R	R	R	R	R	R	R
S2_13402953	C/A	2	13402953	+	NA	NA	NA	NA	NA	NA	C	C	C	C	C	C	C	C	C	C
S2_13402957	C/T	2	13402957	+	NA	NA	NA	NA	NA	NA	C	Y	Y	C	C	C	C	C	Y	C
S2_13402968	C/T	2	13402968	+	NA	NA	NA	NA	NA	NA	C	Y	C	Y	Y	Y	Y	Y	C	Y
S2_13402969	T/A	2	13402969	+	NA	NA	NA	NA	NA	NA	T	T	T	T	W	T	T	T	W	W
S2_13402970	A/G	2	13402970	+	NA	NA	NA	NA	NA	NA	A	A	A	A	A	A	A	A	A	A
S2_13405133	C/T	2	13405133	+	NA	NA	NA	NA	NA	NA	Y	Y	Y	Y	Y	Y	Y	Y	Y	Y
S2_13692860	C/A	2	13692860	+	NA	NA	NA	NA	NA	NA	C	C	N	C	C	C	C	C	C	C
S2_13692868	C/T	2	13692868	+	NA	NA	NA	NA	NA	NA	C	C	N	Y	Y	C	Y	C	C	C
S2_13692892	G/T	2	13692892	+	NA	NA	NA	NA	NA	NA	G	G	N	K	G	G	G	G	G	G
S2_13692895	C/T	2	13692895	+	NA	NA	NA	NA	NA	NA	C	C	N	Y	C	C	C	C	C	C
S2_13692896	T/C	2	13692896	+	NA	NA	NA	NA	NA	NA	T	Y	N	T	T	T	T	T	Y	T
S2_13692905	A/G	2	13692905	+	NA	NA	NA	NA	NA	NA	A	A	N	A	A	A	A	A	A	A
S2_13765317	C/T	2	13765317	+	NA	NA	NA	NA	NA	NA	C	C	C	C	C	C	C	C	C	C
S2_14119877	G/T	2	14119877	+	NA	NA	NA	NA	NA	NA	T	G	G	T	T	G	G	G	K	K
S2_14119878	G/A	2	14119878	+	NA	NA	NA	NA	NA	NA	G	G	G	G	G	R	R	G	R	R
S2_14144913	G/A	2	14144913	+	NA	NA	NA	NA	NA	NA	G	G	G	G	G	G	G	G	G	G
S2_14167831	C/T	2	14167831	+	NA	NA	NA	NA	NA	NA	C	T	T	C	C	T	T	Y	C	C
S2_14171276	T/G	2	14171276	+	NA	NA	NA	NA	NA	NA	T	T	T	T	T	T	T	T	T	T
S2_14171304	C/A	2	14171304	+	NA	NA	NA	NA	NA	NA	C	C	C	C	C	C	C	C	C	C
S2_14390628	T/C	2	14390628	+	NA	NA	NA	NA	NA	NA	Y	N	T	Y	C	T	T	T	Y	C
S2_14390647	T/G	2	14390647	+	NA	NA	NA	NA	NA	NA	T	N	T	K	T	K	K	K	T	T
S2_14706258	T/G	2	14706258	+	NA	NA	NA	NA	NA	NA	T	G	G	T	T	G	T	G	T	T
S2_15023314	C/T	2	15023314	+	NA	NA	NA	NA	NA	NA	C	T	T	C	C	T	T	T	C	C
S2_15023315	A/C	2	15023315	+	NA	NA	NA	NA	NA	NA	A	A	A	A	A	A	A	A	A	A
S2_15023330	C/G	2	15023330	+	NA	NA	NA	NA	NA	NA	C	C	C	C	C	C	C	C	C	C
S2_15023372	T/G	2	15023372	+	NA	NA	NA	NA	NA	NA	T	G	G	T	T	G	G	K	T	T
S2_15023382	C/T	2	15023382	+	NA	NA	NA	NA	NA	NA	C	T	T	C	C	T	T	Y	C	C
S2_15127060	T/C	2	15127060	+	NA	NA	NA	NA	NA	NA	N	T	C	T	T	C	N	T	T	T
S2_15127073	A/T	2	15127073	+	NA	NA	NA	NA	NA	NA	N	T	A	A	W	A	N	A	W	T
S2_15127091	G/A	2	15127091	+	NA	NA	NA	NA	NA	NA	N	G	G	G	G	G	N	G	G	G
S2_15626248	T/C	2	15626248	+	NA	NA	NA	NA	NA	NA	T	N	T	T	T	T	T	T	T	T
S2_15802718	T/G	2	15802718	+	NA	NA	NA	NA	NA	NA	T	G	N	K	K	T	T	T	G	K
S2_15802737	C/T	2	15802737	+	NA	NA	NA	NA	NA	NA	C	T	N	Y	Y	C	C	C	T	Y
S2_15802797	A/C	2	15802797	+	NA	NA	NA	NA	NA	NA	A	A	N	A	A	A	A	A	A	A
S2_15802798	C/A	2	15802798	+	NA	NA	NA	NA	NA	NA	C	M	N	C	M	C	C	M	M	M
S2_16083023	A/G	2	16083023	+	NA	NA	NA	NA	NA	NA	G	R	R	R	G	R	R	N	R	G
S2_16083048	A/G	2	16083048	+	NA	NA	NA	NA	NA	NA	R	R	A	A	A	A	A	N	R	R
S2_16242735	G/A	2	16242735	+	NA	NA	NA	NA	NA	NA	N	N	N	N	A	N	N	N	A	G
S2_16242741	T/C	2	16242741	+	NA	NA	NA	NA	NA	NA	N	N	N	N	C	N	N	N	C	T
S2_16242750	T/C	2	16242750	+	NA	NA	NA	NA	NA	NA	N	T	N	N	Y	N	N	N	N	C
S2_16242758	A/G	2	16242758	+	NA	NA	NA	NA	NA	NA	N	A	N	N	R	N	N	N	N	G
S2_16242761	T/C	2	16242761	+	NA	NA	NA	NA	NA	NA	N	T	N	N	Y	N	N	N	N	C
S2_16242768	T/C	2	16242768	+	NA	NA	NA	NA	NA	NA	N	N	N	N	C	N	N	N	C	T
S2_16242789	T/A	2	16242789	+	NA	NA	NA	NA	NA	NA	N	T	N	N	T	N	N	N	N	T
S2_16243446	C/T	2	16243446	+	NA	NA	NA	NA	NA	NA	Y	C	Y	Y	C	Y	Y	Y	Y	C
S2_16243465	A/G	2	16243465	+	NA	NA	NA	NA	NA	NA	R	A	R	R	A	R	R	R	R	A
S2_16243468	A/G	2	16243468	+	NA	NA	NA	NA	NA	NA	R	A	R	R	A	R	R	R	R	A
S2_16631098	T/C	2	16631098	+	NA	NA	NA	NA	NA	NA	T	T	T	T	T	T	T	T	T	T
S2_16631115	C/T	2	16631115	+	NA	NA	NA	NA	NA	NA	C	C	C	C	C	C	C	C	C	C
S2_16678676	T/G	2	16678676	+	NA	NA	NA	NA	NA	NA	T	K	K	G	K	K	K	K	K	T
S2_16678677	G/A	2	16678677	+	NA	NA	NA	NA	NA	NA	G	R	R	A	R	R	R	R	R	G
S2_16678761	T/C	2	16678761	+	NA	NA	NA	NA	NA	NA	T	Y	T	T	T	Y	T	N	T	T
S2_16678793	G/A	2	16678793	+	NA	NA	NA	NA	NA	NA	G	G	G	G	G	G	G	N	G	G
S2_16922070	A/C	2	16922070	+	NA	NA	NA	NA	NA	NA	A	A	A	A	A	A	A	N	A	A
S2_16922105	C/T	2	16922105	+	NA	NA	NA	NA	NA	NA	C	C	C	C	C	C	C	C	C	C
S2_16922122	G/A	2	16922122	+	NA	NA	NA	NA	NA	NA	G	G	G	G	G	G	G	G	G	G
S2_16922123	G/A	2	16922123	+	NA	NA	NA	NA	NA	NA	G	G	G	G	G	G	G	G	G	G
S2_16922147	T/C	2	16922147	+	NA	NA	NA	NA	NA	NA	T	T	T	T	T	T	T	T	T	T
S2_16922207	T/C	2	16922207	+	NA	NA	NA	NA	NA	NA	T	T	T	T	T	T	T	T	T	T
S2_17623043	T/G	2	17623043	+	NA	NA	NA	NA	NA	NA	G	G	G	G	G	G	G	G	G	G
S2_18370572	T/C	2	18370572	+	NA	NA	NA	NA	NA	NA	N	N	N	T	T	T	T	N	T	T
S2_18529482	G/A	2	18529482	+	NA	NA	NA	NA	NA	NA	G	G	G	G	G	G	G	G	G	G
S2_19100839	A/G	2	19100839	+	NA	NA	NA	NA	NA	NA	A	A	A	A	N	A	A	A	A	A
S2_19659474	G/T	2	19659474	+	NA	NA	NA	NA	NA	NA	K	K	K	K	K	K	K	K	K	K
S2_19659492	G/A	2	19659492	+	NA	NA	NA	NA	NA	NA	R	R	R	R	R	R	R	R	R	R
S2_19750370	G/A	2	19750370	+	NA	NA	NA	NA	NA	NA	G	A	G	G	A	G	G	G	R	A
S2_19750392	C/T	2	19750392	+	NA	NA	NA	NA	NA	NA	T	C	T	T	C	T	T	C	Y	C
S2_19750397	T/C	2	19750397	+	NA	NA	NA	NA	NA	NA	T	T	T	T	T	T	T	T	T	T
S2_20715709	A/T	2	20715709	+	NA	NA	NA	NA	NA	NA	N	N	N	N	N	N	N	A	A	N
S2_21644310	C/A	2	21644310	+	NA	NA	NA	NA	NA	NA	C	M	M	M	C	M	C	C	M	M
S2_21644326	T/C	2	21644326	+	NA	NA	NA	NA	NA	NA	Y	Y	Y	Y	Y	Y	Y	T	Y	Y
S2_21831118	A/T	2	21831118	+	NA	NA	NA	NA	NA	NA	A	A	A	A	A	A	A	A	A	A
S2_22111216	C/T	2	22111216	+	NA	NA	NA	NA	NA	NA	T	C	N	T	Y	Y	T	N	C	Y
S2_22111217	C/T	2	22111217	+	NA	NA	NA	NA	NA	NA	C	T	N	C	Y	Y	C	N	Y	Y
S2_22111240	A/G	2	22111240	+	NA	NA	NA	NA	NA	NA	G	A	N	G	R	R	G	N	A	R
S2_22111245	C/G	2	22111245	+	NA	NA	NA	NA	NA	NA	G	C	N	G	S	S	G	N	C	S
S2_22111251	G/T	2	22111251	+	NA	NA	NA	NA	NA	NA	T	G	N	T	K	K	T	N	G	K
S2_22111294	C/T	2	22111294	+	NA	NA	NA	NA	NA	NA	N	T	N	N	T	T	N	N	Y	T
S2_22111312	G/C	2	22111312	+	NA	NA	NA	NA	NA	NA	N	G	N	N	G	G	N	N	G	G
S2_23058149	C/A	2	23058149	+	NA	NA	NA	NA	NA	NA	C	C	C	C	C	C	C	C	C	C
S2_23058176	G/T	2	23058176	+	NA	NA	NA	NA	NA	NA	G	G	G	G	G	G	G	G	G	G
S2_23365603	T/G	2	23365603	+	NA	NA	NA	NA	NA	NA	K	T	K	K	K	K	T	K	K	K
S2_23365610	T/G	2	23365610	+	NA	NA	NA	NA	NA	NA	K	T	K	K	K	K	T	K	K	K
S2_23803076	A/T	2	23803076	+	NA	NA	NA	NA	NA	NA	A	A	A	A	A	A	A	A	A	A
S2_23803096	A/C	2	23803096	+	NA	NA	NA	NA	NA	NA	A	A	A	A	A	A	A	A	A	A
S2_23803104	C/G	2	23803104	+	NA	NA	NA	NA	NA	NA	C	C	C	C	C	C	C	C	C	C
S2_24630827	G/A	2	24630827	+	NA	NA	NA	NA	NA	NA	G	G	G	G	G	G	G	G	G	G
S2_24630828	A/G	2	24630828	+	NA	NA	NA	NA	NA	NA	A	A	A	A	A	A	A	A	A	A
S2_24819892	C/A	2	24819892	+	NA	NA	NA	NA	NA	NA	C	C	C	C	C	C	C	C	C	C
S2_24819917	G/C	2	24819917	+	NA	NA	NA	NA	NA	NA	S	S	G	S	S	S	G	G	G	S
S2_24819987	C/T	2	24819987	+	NA	NA	NA	NA	NA	NA	Y	C	Y	C	Y	Y	Y	T	Y	Y
S2_25341308	C/A	2	25341308	+	NA	NA	NA	NA	NA	NA	N	N	N	N	C	N	N	C	C	N
S2_25341327	G/A	2	25341327	+	NA	NA	NA	NA	NA	NA	N	N	N	N	G	N	N	G	G	N
S2_25341359	T/A	2	25341359	+	NA	NA	NA	NA	NA	NA	N	N	N	N	N	A	A	A	A	A
S2_25341360	A/G	2	25341360	+	NA	NA	NA	NA	NA	NA	N	N	N	N	N	G	G	G	G	G
S2_26384592	C/T	2	26384592	+	NA	NA	NA	NA	NA	NA	Y	C	N	C	Y	Y	Y	N	C	Y
S2_26384615	G/A	2	26384615	+	NA	NA	NA	NA	NA	NA	R	G	N	G	R	R	R	N	G	R
S2_26384707	G/T	2	26384707	+	NA	NA	NA	NA	NA	NA	K	K	G	G	K	G	G	G	K	G
S2_26384710	A/G	2	26384710	+	NA	NA	NA	NA	NA	NA	R	R	A	A	R	A	A	A	R	A
S2_26384716	A/C	2	26384716	+	NA	NA	NA	NA	NA	NA	A	A	A	A	A	A	A	A	A	M
S2_26384754	G/A	2	26384754	+	NA	NA	NA	NA	NA	NA	R	R	G	G	R	G	G	G	R	G
S2_26384755	G/C	2	26384755	+	NA	NA	NA	NA	NA	NA	S	S	G	G	S	G	G	G	S	G
S2_26384759	C/A	2	26384759	+	NA	NA	NA	NA	NA	NA	M	C	C	M	M	M	M	C	C	M
S2_27088051	T/C	2	27088051	+	NA	NA	NA	NA	NA	NA	T	T	T	T	T	T	T	T	T	T
S2_27088088	G/C	2	27088088	+	NA	NA	NA	NA	NA	NA	G	G	G	G	G	G	G	G	G	G
S2_27088095	A/C	2	27088095	+	NA	NA	NA	NA	NA	NA	A	A	A	A	A	A	A	A	A	A
S2_29147762	G/C	2	29147762	+	NA	NA	NA	NA	NA	NA	G	G	G	G	G	G	G	G	G	G
S2_29147768	A/T	2	29147768	+	NA	NA	NA	NA	NA	NA	A	A	A	A	A	A	A	A	A	A
S2_29321551	T/A	2	29321551	+	NA	NA	NA	NA	NA	NA	T	N	T	W	T	W	W	W	W	T
S2_29487167	C/T	2	29487167	+	NA	NA	NA	NA	NA	NA	C	N	C	C	C	C	C	N	C	C
S2_29748986	A/T	2	29748986	+	NA	NA	NA	NA	NA	NA	T	A	A	T	W	T	A	A	T	A
S2_29749007	T/G	2	29749007	+	NA	NA	NA	NA	NA	NA	T	T	N	T	T	T	T	T	T	T
S2_29749028	T/G	2	29749028	+	NA	NA	NA	NA	NA	NA	T	T	N	T	K	T	T	T	T	K
S2_29749034	T/G	2	29749034	+	NA	NA	NA	NA	NA	NA	T	T	N	T	K	T	T	T	T	T
S2_30749921	A/G	2	30749921	+	NA	NA	NA	NA	NA	NA	A	A	A	N	A	A	A	N	A	A
S2_30749947	C/A	2	30749947	+	NA	NA	NA	NA	NA	NA	A	C	C	N	A	C	A	N	A	A
S2_31246269	T/C	2	31246269	+	NA	NA	NA	NA	NA	NA	T	T	T	T	T	T	T	T	T	T
S2_31440649	G/A	2	31440649	+	NA	NA	NA	NA	NA	NA	G	A	N	G	R	G	G	A	G	R
S2_31440650	C/T	2	31440650	+	NA	NA	NA	NA	NA	NA	C	T	N	C	Y	C	C	T	C	Y
S2_31440687	G/T	2	31440687	+	NA	NA	NA	NA	NA	NA	G	T	N	G	K	G	G	T	G	K
S2_31440704	C/T	2	31440704	+	NA	NA	NA	NA	NA	NA	C	T	N	C	Y	C	C	T	C	Y
S2_31466277	T/C	2	31466277	+	NA	NA	NA	NA	NA	NA	T	C	C	T	T	Y	T	N	T	T
S2_31466300	C/T	2	31466300	+	NA	NA	NA	NA	NA	NA	C	T	T	C	C	Y	C	N	C	C
S2_31466313	T/C	2	31466313	+	NA	NA	NA	NA	NA	NA	T	C	C	T	T	Y	T	N	T	T
S2_31754610	A/T	2	31754610	+	NA	NA	NA	NA	NA	NA	A	A	A	A	W	A	W	A	W	A
S2_31909295	G/A	2	31909295	+	NA	NA	NA	NA	NA	NA	G	A	A	G	G	R	G	N	G	G
S2_32044732	C/A	2	32044732	+	NA	NA	NA	NA	NA	NA	C	C	M	C	C	C	C	M	C	C
S2_32044734	C/T	2	32044734	+	NA	NA	NA	NA	NA	NA	C	C	Y	C	C	C	C	Y	C	C
S2_32044760	G/A	2	32044760	+	NA	NA	NA	NA	NA	NA	R	G	R	R	R	G	R	G	G	G
S2_32196117	C/T	2	32196117	+	NA	NA	NA	NA	NA	NA	C	Y	Y	C	C	Y	Y	Y	C	C
S2_32196138	C/T	2	32196138	+	NA	NA	NA	NA	NA	NA	C	Y	Y	C	C	Y	Y	Y	C	C
S2_32196150	T/A	2	32196150	+	NA	NA	NA	NA	NA	NA	T	W	W	T	T	W	W	W	T	T
S2_32276983	C/T	2	32276983	+	NA	NA	NA	NA	NA	NA	C	C	C	C	C	C	C	C	C	C
S2_32276984	G/C	2	32276984	+	NA	NA	NA	NA	NA	NA	G	S	G	G	G	G	G	G	G	G
S2_32276985	G/A	2	32276985	+	NA	NA	NA	NA	NA	NA	G	G	G	G	G	G	G	G	N	G
S2_32276986	C/A	2	32276986	+	NA	NA	NA	NA	NA	NA	C	C	C	C	C	C	C	C	C	C
S2_32276988	T/C	2	32276988	+	NA	NA	NA	NA	NA	NA	T	Y	T	T	T	T	T	T	T	T
S2_32276992	T/G	2	32276992	+	NA	NA	NA	NA	NA	NA	T	T	T	T	T	K	T	T	T	T
S2_32276995	A/T	2	32276995	+	NA	NA	NA	NA	NA	NA	W	T	A	W	W	W	A	W	W	W
S2_32276996	A/T	2	32276996	+	NA	NA	NA	NA	NA	NA	A	A	A	W	A	W	A	A	W	A
S2_32276999	A/T	2	32276999	+	NA	NA	NA	NA	NA	NA	W	A	A	W	A	A	A	A	W	A
S2_32277001	T/A	2	32277001	+	NA	NA	NA	NA	NA	NA	W	T	A	W	W	W	A	W	W	W
S2_32277002	T/A	2	32277002	+	NA	NA	NA	NA	NA	NA	W	T	A	W	W	W	A	W	W	W
S2_32277011	A/G	2	32277011	+	NA	NA	NA	NA	NA	NA	A	A	A	A	A	A	A	A	A	A
S2_32277012	C/T	2	32277012	+	NA	NA	NA	NA	NA	NA	Y	C	T	Y	Y	Y	T	Y	Y	Y
S2_32681197	A/C	2	32681197	+	NA	NA	NA	NA	NA	NA	A	A	A	A	N	A	A	A	A	N
S2_32832754	T/A	2	32832754	+	NA	NA	NA	NA	NA	NA	T	T	T	T	T	T	T	T	W	W
S2_32832764	T/C	2	32832764	+	NA	NA	NA	NA	NA	NA	T	T	T	Y	Y	T	Y	T	Y	Y
S2_32970664	A/C	2	32970664	+	NA	NA	NA	NA	NA	NA	A	A	A	A	A	A	A	A	A	A
S2_33344222	C/T	2	33344222	+	NA	NA	NA	NA	NA	NA	C	C	C	C	C	C	C	C	C	C
S2_33344224	G/A	2	33344224	+	NA	NA	NA	NA	NA	NA	G	R	R	G	G	R	G	A	G	G
S2_33344253	C/A	2	33344253	+	NA	NA	NA	NA	NA	NA	C	C	C	C	C	C	C	C	C	C
S2_33813906	T/A	2	33813906	+	NA	NA	NA	NA	NA	NA	T	T	T	T	T	T	T	T	T	T
S2_33888179	A/G	2	33888179	+	NA	NA	NA	NA	NA	NA	A	A	A	R	A	A	R	A	R	A
S2_33888190	T/C	2	33888190	+	NA	NA	NA	NA	NA	NA	T	T	T	Y	T	T	Y	T	Y	T
S2_33888199	A/G	2	33888199	+	NA	NA	NA	NA	NA	NA	A	A	A	R	A	A	R	A	R	A
S2_33888201	G/C	2	33888201	+	NA	NA	NA	NA	NA	NA	G	G	G	G	G	G	G	G	G	G
S2_33888238	C/A	2	33888238	+	NA	NA	NA	NA	NA	NA	C	C	C	C	C	C	C	C	C	C
S2_33888246	C/T	2	33888246	+	NA	NA	NA	NA	NA	NA	C	C	C	C	C	C	C	C	C	C
S2_33888253	A/T	2	33888253	+	NA	NA	NA	NA	NA	NA	A	A	A	A	A	A	A	A	A	A
S2_33888325	T/C	2	33888325	+	NA	NA	NA	NA	NA	NA	T	T	T	T	T	T	T	T	T	T
S2_33888352	C/T	2	33888352	+	NA	NA	NA	NA	NA	NA	C	C	C	C	C	C	C	C	C	C
S2_33894470	A/G	2	33894470	+	NA	NA	NA	NA	NA	NA	A	N	N	A	A	N	N	N	A	A
S2_34521356	T/A	2	34521356	+	NA	NA	NA	NA	NA	NA	W	T	W	W	T	W	W	W	W	T
S2_34521365	T/G	2	34521365	+	NA	NA	NA	NA	NA	NA	K	T	K	K	T	K	K	K	K	T
S2_34521373	T/C	2	34521373	+	NA	NA	NA	NA	NA	NA	T	T	T	T	T	T	T	T	T	T
S2_34521380	T/A	2	34521380	+	NA	NA	NA	NA	NA	NA	T	T	T	T	T	T	T	T	T	T
S2_34543770	T/A	2	34543770	+	NA	NA	NA	NA	NA	NA	T	W	T	W	W	W	W	W	T	W
S2_34543776	A/G	2	34543776	+	NA	NA	NA	NA	NA	NA	R	A	R	R	R	R	R	A	A	R
S2_34543779	G/C	2	34543779	+	NA	NA	NA	NA	NA	NA	G	S	G	S	S	S	S	S	G	S
S2_34543873	A/G	2	34543873	+	NA	NA	NA	NA	NA	NA	A	R	R	R	R	R	R	R	A	R
S2_34543874	G/C	2	34543874	+	NA	NA	NA	NA	NA	NA	S	S	S	C	S	S	S	S	S	S
S2_34543876	T/C	2	34543876	+	NA	NA	NA	NA	NA	NA	Y	Y	Y	C	Y	Y	Y	Y	Y	Y
S2_34671720	T/C	2	34671720	+	NA	NA	NA	NA	NA	NA	C	C	C	C	C	C	C	C	C	C
S2_34671744	A/C	2	34671744	+	NA	NA	NA	NA	NA	NA	C	C	C	C	C	C	C	C	C	C
S2_34867468	T/C	2	34867468	+	NA	NA	NA	NA	NA	NA	C	T	T	C	C	Y	C	T	C	C
S2_34968065	G/A	2	34968065	+	NA	NA	NA	NA	NA	NA	A	G	G	A	A	R	A	R	A	A
S2_34968089	T/G	2	34968089	+	NA	NA	NA	NA	NA	NA	G	T	T	G	G	K	G	K	G	G
S2_35398182	A/G	2	35398182	+	NA	NA	NA	NA	NA	NA	G	A	A	G	R	G	A	A	G	G
S2_35443740	T/A	2	35443740	+	NA	NA	NA	NA	NA	NA	T	T	T	T	T	T	T	T	T	T
S2_35443778	T/G	2	35443778	+	NA	NA	NA	NA	NA	NA	T	K	T	T	T	T	T	T	T	T
S2_35789881	G/T	2	35789881	+	NA	NA	NA	NA	NA	NA	N	G	N	G	G	N	N	G	G	G
S2_35789918	T/C	2	35789918	+	NA	NA	NA	NA	NA	NA	N	T	N	T	T	N	N	T	T	T
S2_35789921	A/G	2	35789921	+	NA	NA	NA	NA	NA	NA	N	A	N	A	A	N	N	A	A	A
S2_36506355	G/A	2	36506355	+	NA	NA	NA	NA	NA	NA	A	R	R	G	R	R	G	G	G	R
S2_36709650	A/T	2	36709650	+	NA	NA	NA	NA	NA	NA	N	W	W	N	N	W	N	W	N	N
S2_36709651	A/T	2	36709651	+	NA	NA	NA	NA	NA	NA	N	W	W	N	N	W	N	W	N	N
S2_36709652	A/T	2	36709652	+	NA	NA	NA	NA	NA	NA	N	A	W	N	N	N	N	W	N	N
S2_36709653	A/T	2	36709653	+	NA	NA	NA	NA	NA	NA	N	A	A	N	N	A	N	N	N	N
S2_37051489	A/C	2	37051489	+	NA	NA	NA	NA	NA	NA	A	A	A	A	A	A	A	A	A	A
S2_37051505	A/G	2	37051505	+	NA	NA	NA	NA	NA	NA	G	G	G	G	G	G	G	G	G	G
S2_37840427	T/C	2	37840427	+	NA	NA	NA	NA	NA	NA	C	T	T	C	Y	Y	Y	T	Y	Y
S2_37840439	A/T	2	37840439	+	NA	NA	NA	NA	NA	NA	A	T	T	A	W	W	W	T	W	W
S2_37933363	C/T	2	37933363	+	NA	NA	NA	NA	NA	NA	Y	C	Y	Y	C	Y	Y	Y	Y	C
S2_37933395	T/C	2	37933395	+	NA	NA	NA	NA	NA	NA	Y	T	Y	Y	T	Y	Y	Y	Y	T
S2_37933407	T/A	2	37933407	+	NA	NA	NA	NA	NA	NA	W	T	W	W	T	W	W	W	W	T
S2_37933411	A/T	2	37933411	+	NA	NA	NA	NA	NA	NA	W	A	W	W	A	W	W	W	W	A
S2_38512048	G/T	2	38512048	+	NA	NA	NA	NA	NA	NA	T	G	G	T	T	K	T	G	T	T
S2_38663027	C/A	2	38663027	+	NA	NA	NA	NA	NA	NA	M	C	M	C	C	M	M	M	M	C
S2_38663054	T/C	2	38663054	+	NA	NA	NA	NA	NA	NA	Y	T	T	Y	Y	T	T	T	T	T
S2_38663062	G/A	2	38663062	+	NA	NA	NA	NA	NA	NA	R	G	R	G	G	R	R	R	R	G
S2_39043149	A/G	2	39043149	+	NA	NA	NA	NA	NA	NA	N	A	A	A	A	A	A	A	N	A
S2_39043173	C/G	2	39043173	+	NA	NA	NA	NA	NA	NA	N	C	C	C	C	C	C	C	N	C
S2_39043202	A/G	2	39043202	+	NA	NA	NA	NA	NA	NA	G	N	G	A	A	G	G	G	G	A
S2_39043245	A/G	2	39043245	+	NA	NA	NA	NA	NA	NA	G	N	G	A	A	G	G	G	G	A
S2_39043256	A/G	2	39043256	+	NA	NA	NA	NA	NA	NA	G	N	G	A	A	G	G	G	G	A
S2_39110813	T/A	2	39110813	+	NA	NA	NA	NA	NA	NA	T	T	T	T	T	T	T	T	T	T
S2_39110822	A/C	2	39110822	+	NA	NA	NA	NA	NA	NA	A	A	A	A	A	A	A	A	A	A
S2_39110876	G/A	2	39110876	+	NA	NA	NA	NA	NA	NA	G	G	G	G	G	G	G	G	G	G
S2_39310747	C/A	2	39310747	+	NA	NA	NA	NA	NA	NA	M	M	C	M	M	M	M	M	M	M
S2_39310752	C/T	2	39310752	+	NA	NA	NA	NA	NA	NA	Y	Y	C	Y	Y	Y	Y	Y	Y	Y
S2_39310768	C/T	2	39310768	+	NA	NA	NA	NA	NA	NA	C	Y	C	Y	C	C	C	Y	C	C
S2_39985652	T/A	2	39985652	+	NA	NA	NA	NA	NA	NA	N	T	N	T	T	A	T	T	T	T
S2_39985653	A/G	2	39985653	+	NA	NA	NA	NA	NA	NA	N	A	N	A	A	G	A	A	A	A
S2_40302132	A/C	2	40302132	+	NA	NA	NA	NA	NA	NA	C	C	C	C	C	C	C	C	C	C
S2_40302146	C/A	2	40302146	+	NA	NA	NA	NA	NA	NA	N	C	N	N	N	N	N	N	N	C
S2_40302174	C/A	2	40302174	+	NA	NA	NA	NA	NA	NA	N	C	N	N	N	N	N	N	N	C
S2_40302178	T/A	2	40302178	+	NA	NA	NA	NA	NA	NA	N	T	N	N	N	N	N	N	N	T
S2_40335225	C/G	2	40335225	+	NA	NA	NA	NA	NA	NA	C	G	G	C	C	S	C	G	C	C
S2_40335228	A/G	2	40335228	+	NA	NA	NA	NA	NA	NA	A	G	G	A	A	R	A	G	A	A
S2_40508201	A/C	2	40508201	+	NA	NA	NA	NA	NA	NA	A	A	M	A	A	M	M	C	A	A
S2_40508203	G/A	2	40508203	+	NA	NA	NA	NA	NA	NA	G	G	G	G	G	G	G	G	G	G
S2_40508229	C/T	2	40508229	+	NA	NA	NA	NA	NA	NA	C	C	Y	C	C	Y	Y	T	C	C
S2_40705846	T/C	2	40705846	+	NA	NA	NA	NA	NA	NA	T	T	T	T	T	T	T	T	T	T
S2_40715208	A/C	2	40715208	+	NA	NA	NA	NA	NA	NA	A	C	C	A	A	M	A	M	A	A
S2_40741401	C/G	2	40741401	+	NA	NA	NA	NA	NA	NA	S	S	S	S	S	S	S	S	S	S
S2_40741422	C/T	2	40741422	+	NA	NA	NA	NA	NA	NA	Y	Y	Y	Y	Y	Y	Y	Y	Y	C
S2_40741423	C/T	2	40741423	+	NA	NA	NA	NA	NA	NA	Y	C	C	Y	Y	C	Y	C	Y	Y
S2_40821712	T/G	2	40821712	+	NA	NA	NA	NA	NA	NA	N	G	G	N	N	G	N	G	N	N
S2_40821721	A/G	2	40821721	+	NA	NA	NA	NA	NA	NA	N	A	A	N	N	A	N	A	N	N
S2_41489197	A/T	2	41489197	+	NA	NA	NA	NA	NA	NA	N	N	N	N	N	A	A	N	N	N
S2_41489198	T/A	2	41489198	+	NA	NA	NA	NA	NA	NA	N	N	N	N	N	W	T	N	N	N
S2_43099236	G/A	2	43099236	+	NA	NA	NA	NA	NA	NA	R	R	R	R	R	R	A	R	R	R
S2_43099250	C/A	2	43099250	+	NA	NA	NA	NA	NA	NA	M	M	M	M	M	M	A	M	M	M
S2_43617907	A/C	2	43617907	+	NA	NA	NA	NA	NA	NA	A	C	M	M	M	M	M	A	M	M
S2_43617947	C/T	2	43617947	+	NA	NA	NA	NA	NA	NA	C	C	C	Y	C	C	C	C	C	C
S2_43617954	G/T	2	43617954	+	NA	NA	NA	NA	NA	NA	G	T	K	K	K	K	K	G	K	K
S2_44230268	A/G	2	44230268	+	NA	NA	NA	NA	NA	NA	A	N	N	A	A	A	A	A	A	A
S2_44294178	G/T	2	44294178	+	NA	NA	NA	NA	NA	NA	G	G	G	G	G	K	K	K	K	K
S2_44294211	A/G	2	44294211	+	NA	NA	NA	NA	NA	NA	A	A	A	A	A	R	R	R	R	R
S2_44294215	A/G	2	44294215	+	NA	NA	NA	NA	NA	NA	G	G	G	G	G	G	G	G	G	G
S2_44558832	T/A	2	44558832	+	NA	NA	NA	NA	NA	NA	W	W	W	W	W	W	W	W	W	W
S2_44558923	C/A	2	44558923	+	NA	NA	NA	NA	NA	NA	M	M	M	M	M	M	M	M	M	M
S2_45595483	T/C	2	45595483	+	NA	NA	NA	NA	NA	NA	T	T	T	N	T	T	T	N	T	N
S2_45631612	G/A	2	45631612	+	NA	NA	NA	NA	NA	NA	G	A	A	G	G	R	G	A	G	G
S2_45631615	C/T	2	45631615	+	NA	NA	NA	NA	NA	NA	C	T	T	C	C	Y	C	T	C	C
S2_46524000	A/C	2	46524000	+	NA	NA	NA	NA	NA	NA	A	A	A	A	A	A	A	A	A	A
S2_46783942	A/G	2	46783942	+	NA	NA	NA	NA	NA	NA	R	A	A	A	R	A	R	A	A	A
S2_46783949	A/T	2	46783949	+	NA	NA	NA	NA	NA	NA	A	A	A	A	A	A	A	A	A	A
S2_46783978	G/A	2	46783978	+	NA	NA	NA	NA	NA	NA	R	R	R	R	G	R	R	R	R	G
S2_46783988	G/T	2	46783988	+	NA	NA	NA	NA	NA	NA	K	G	G	K	K	G	K	G	K	K
S2_46783989	C/T	2	46783989	+	NA	NA	NA	NA	NA	NA	Y	C	C	C	Y	C	Y	C	C	C
S2_47308278	A/G	2	47308278	+	NA	NA	NA	NA	NA	NA	A	N	A	A	A	A	A	A	A	A
S2_47674309	C/T	2	47674309	+	NA	NA	NA	NA	NA	NA	C	C	C	C	C	C	C	C	C	C
S2_47674321	A/T	2	47674321	+	NA	NA	NA	NA	NA	NA	A	A	A	A	A	A	A	A	A	A
S2_47876561	C/T	2	47876561	+	NA	NA	NA	NA	NA	NA	C	C	C	C	C	Y	Y	T	Y	Y
S2_47876590	C/T	2	47876590	+	NA	NA	NA	NA	NA	NA	C	C	C	C	C	Y	Y	T	Y	Y
S2_48900375	G/A	2	48900375	+	NA	NA	NA	NA	NA	NA	R	R	R	R	R	R	R	R	R	R
S2_48900388	A/T	2	48900388	+	NA	NA	NA	NA	NA	NA	W	W	T	W	W	W	W	W	W	W
S2_49159651	A/G	2	49159651	+	NA	NA	NA	NA	NA	NA	A	A	A	A	A	A	A	A	A	A
S2_49159690	A/G	2	49159690	+	NA	NA	NA	NA	NA	NA	A	A	A	A	A	A	A	A	A	A
S2_49159693	C/T	2	49159693	+	NA	NA	NA	NA	NA	NA	T	C	Y	C	C	Y	Y	Y	T	C
S2_49159698	C/T	2	49159698	+	NA	NA	NA	NA	NA	NA	T	C	Y	C	C	Y	Y	Y	T	C
S2_49170377	A/G	2	49170377	+	NA	NA	NA	NA	NA	NA	A	A	A	A	A	A	A	A	A	A
S2_49552728	T/A	2	49552728	+	NA	NA	NA	NA	NA	NA	T	T	T	T	T	T	N	T	T	N
S2_49612457	G/T	2	49612457	+	NA	NA	NA	NA	NA	NA	G	T	T	G	G	K	G	T	G	G
S2_49649643	C/T	2	49649643	+	NA	NA	NA	NA	NA	NA	C	T	T	C	C	Y	C	T	C	C
S2_52244677	A/C	2	52244677	+	NA	NA	NA	NA	NA	NA	A	A	N	A	A	M	A	A	A	A
S2_52244693	A/G	2	52244693	+	NA	NA	NA	NA	NA	NA	A	G	N	A	A	R	A	A	A	A
S2_52774329	C/A	2	52774329	+	NA	NA	NA	NA	NA	NA	C	A	A	C	C	M	C	A	C	C
S2_52774347	A/C	2	52774347	+	NA	NA	NA	NA	NA	NA	A	C	C	A	A	M	A	C	A	A
S2_52934472	A/G	2	52934472	+	NA	NA	NA	NA	NA	NA	R	R	R	R	R	R	R	R	R	R
S2_52934480	A/C	2	52934480	+	NA	NA	NA	NA	NA	NA	M	M	M	M	M	M	M	M	M	M
S2_53060110	G/C	2	53060110	+	NA	NA	NA	NA	NA	NA	S	S	C	S	S	S	S	S	S	S
S2_53700438	A/G	2	53700438	+	NA	NA	NA	NA	NA	NA	R	A	A	R	R	A	A	A	A	A
S2_53700457	A/G	2	53700457	+	NA	NA	NA	NA	NA	NA	R	R	R	R	R	R	R	R	A	R
S2_53700465	G/A	2	53700465	+	NA	NA	NA	NA	NA	NA	R	R	R	R	R	R	R	R	G	R
S2_53700480	G/A	2	53700480	+	NA	NA	NA	NA	NA	NA	R	R	R	R	R	R	R	R	G	R
S2_53700495	G/A	2	53700495	+	NA	NA	NA	NA	NA	NA	G	R	G	G	G	G	G	R	G	G
S2_53829530	T/A	2	53829530	+	NA	NA	NA	NA	NA	NA	N	T	T	T	T	T	T	T	T	T
S2_53829532	T/C	2	53829532	+	NA	NA	NA	NA	NA	NA	N	T	T	T	T	T	T	T	T	T
S2_53970274	A/T	2	53970274	+	NA	NA	NA	NA	NA	NA	A	A	A	A	A	A	A	A	A	A
S2_53970314	A/T	2	53970314	+	NA	NA	NA	NA	NA	NA	W	A	W	W	A	W	W	W	W	A
S2_54233063	A/G	2	54233063	+	NA	NA	NA	NA	NA	NA	A	N	N	A	A	A	R	N	R	R
S2_54233066	T/G	2	54233066	+	NA	NA	NA	NA	NA	NA	T	N	N	T	T	T	T	N	T	T
S2_54248319	T/G	2	54248319	+	NA	NA	NA	NA	NA	NA	T	N	N	N	N	T	N	N	T	T
S2_54248367	C/T	2	54248367	+	NA	NA	NA	NA	NA	NA	C	C	C	C	C	C	C	C	C	Y
S2_54399704	A/G	2	54399704	+	NA	NA	NA	NA	NA	NA	A	A	A	A	A	R	R	R	R	R
S2_54399706	G/T	2	54399706	+	NA	NA	NA	NA	NA	NA	G	G	G	G	G	K	K	K	K	K
S2_54399717	G/C	2	54399717	+	NA	NA	NA	NA	NA	NA	G	G	G	G	G	S	S	S	S	S
S2_54784133	T/A	2	54784133	+	NA	NA	NA	NA	NA	NA	T	T	T	T	T	T	T	T	T	T
S2_54802457	G/A	2	54802457	+	NA	NA	NA	NA	NA	NA	A	A	A	A	A	A	A	A	A	A
S2_54867216	G/A	2	54867216	+	NA	NA	NA	NA	NA	NA	G	A	A	G	G	R	G	A	G	G
S2_54867251	T/C	2	54867251	+	NA	NA	NA	NA	NA	NA	T	C	C	T	T	C	T	C	T	T
S2_54970450	T/C	2	54970450	+	NA	NA	NA	NA	NA	NA	T	T	T	T	T	Y	C	C	C	Y
S2_54970465	G/A	2	54970465	+	NA	NA	NA	NA	NA	NA	G	G	G	G	G	R	A	A	A	R
S2_54970468	A/G	2	54970468	+	NA	NA	NA	NA	NA	NA	A	A	A	A	A	R	G	G	G	R
S2_54970487	A/T	2	54970487	+	NA	NA	NA	NA	NA	NA	A	A	A	A	A	A	A	A	A	A
S2_55154843	A/C	2	55154843	+	NA	NA	NA	NA	NA	NA	A	A	N	A	A	A	A	A	A	A
S2_55155478	T/G	2	55155478	+	NA	NA	NA	NA	NA	NA	T	T	T	T	T	T	T	T	T	T
S2_56062750	A/C	2	56062750	+	NA	NA	NA	NA	NA	NA	A	C	C	A	A	M	A	N	A	A
S2_56723368	A/G	2	56723368	+	NA	NA	NA	NA	NA	NA	R	N	N	A	A	A	A	R	A	G
S2_56723375	T/A	2	56723375	+	NA	NA	NA	NA	NA	NA	T	N	N	T	T	T	T	W	T	T
S2_56723376	T/G	2	56723376	+	NA	NA	NA	NA	NA	NA	K	N	N	T	T	T	T	K	T	G
S2_56723389	T/A	2	56723389	+	NA	NA	NA	NA	NA	NA	W	N	N	T	T	T	T	W	T	A
S2_56723390	C/G	2	56723390	+	NA	NA	NA	NA	NA	NA	S	N	N	C	C	C	C	S	C	G
S2_56821469	A/G	2	56821469	+	NA	NA	NA	NA	NA	NA	A	R	R	R	R	R	R	G	R	R
S2_56821477	A/T	2	56821477	+	NA	NA	NA	NA	NA	NA	A	W	W	W	W	W	W	T	W	W
S2_56821528	T/C	2	56821528	+	NA	NA	NA	NA	NA	NA	Y	Y	Y	C	Y	Y	C	N	Y	Y
S2_56821531	C/T	2	56821531	+	NA	NA	NA	NA	NA	NA	Y	Y	Y	T	Y	Y	T	N	Y	Y
S2_56821539	A/G	2	56821539	+	NA	NA	NA	NA	NA	NA	A	A	A	A	A	A	A	N	A	A
S2_56821548	C/T	2	56821548	+	NA	NA	NA	NA	NA	NA	C	C	C	C	C	C	C	N	C	C
S2_56821549	G/T	2	56821549	+	NA	NA	NA	NA	NA	NA	K	K	K	T	K	K	T	N	K	K
S2_56821551	G/A	2	56821551	+	NA	NA	NA	NA	NA	NA	G	G	G	G	G	G	G	N	G	G
S2_56821559	T/C	2	56821559	+	NA	NA	NA	NA	NA	NA	T	T	T	T	T	T	T	N	T	T
S2_57958006	G/A	2	57958006	+	NA	NA	NA	NA	NA	NA	G	G	G	G	G	G	G	G	G	G
S2_57958028	T/A	2	57958028	+	NA	NA	NA	NA	NA	NA	T	A	A	T	T	W	T	A	T	T
S2_58742070	A/G	2	58742070	+	NA	NA	NA	NA	NA	NA	A	A	A	A	A	A	A	A	A	A
S2_60120891	G/C	2	60120891	+	NA	NA	NA	NA	NA	NA	C	C	C	C	C	C	C	C	C	C
S2_60120900	T/C	2	60120900	+	NA	NA	NA	NA	NA	NA	C	C	C	C	C	C	C	C	C	C
S2_60120987	A/G	2	60120987	+	NA	NA	NA	NA	NA	NA	N	N	G	G	G	G	G	N	G	G
S2_60645364	C/G	2	60645364	+	NA	NA	NA	NA	NA	NA	C	N	N	C	C	S	C	G	C	C
S2_60714223	G/A	2	60714223	+	NA	NA	NA	NA	NA	NA	G	A	A	G	G	R	G	A	G	G
S2_60955237	C/T	2	60955237	+	NA	NA	NA	NA	NA	NA	Y	C	C	C	C	C	N	N	C	C
S2_60955251	T/C	2	60955251	+	NA	NA	NA	NA	NA	NA	Y	T	T	T	T	T	N	N	T	T
S2_60955255	A/G	2	60955255	+	NA	NA	NA	NA	NA	NA	R	A	A	A	A	A	N	N	A	A
S2_61021051	A/T	2	61021051	+	NA	NA	NA	NA	NA	NA	W	W	W	W	W	W	W	W	W	W
S2_61021095	G/T	2	61021095	+	NA	NA	NA	NA	NA	NA	G	G	G	G	G	G	G	G	G	G
S2_61086303	G/A	2	61086303	+	NA	NA	NA	NA	NA	NA	R	A	A	G	G	R	G	R	G	G
S2_61343124	C/A	2	61343124	+	NA	NA	NA	NA	NA	NA	M	M	M	M	M	M	M	A	M	M
S2_61343128	C/T	2	61343128	+	NA	NA	NA	NA	NA	NA	Y	C	C	Y	C	C	Y	C	Y	Y
S2_61343130	A/C	2	61343130	+	NA	NA	NA	NA	NA	NA	A	M	A	A	A	M	A	A	A	A
S2_61343140	T/C	2	61343140	+	NA	NA	NA	NA	NA	NA	Y	T	Y	Y	Y	Y	Y	T	Y	Y
S2_61343150	A/T	2	61343150	+	NA	NA	NA	NA	NA	NA	A	W	A	A	A	W	A	A	A	A
S2_61372864	G/A	2	61372864	+	NA	NA	NA	NA	NA	NA	R	G	N	A	A	G	A	G	A	A
S2_61431954	T/C	2	61431954	+	NA	NA	NA	NA	NA	NA	T	Y	T	T	T	T	T	N	T	T
S2_61431974	T/C	2	61431974	+	NA	NA	NA	NA	NA	NA	T	T	T	T	T	T	T	N	T	T
S2_61952877	C/A	2	61952877	+	NA	NA	NA	NA	NA	NA	C	C	C	C	C	C	C	C	C	C
S2_61973429	G/C	2	61973429	+	NA	NA	NA	NA	NA	NA	G	G	G	G	G	G	G	G	G	G
S2_62407166	A/C	2	62407166	+	NA	NA	NA	NA	NA	NA	C	C	C	C	C	C	C	C	C	C
S2_63789688	C/A	2	63789688	+	NA	NA	NA	NA	NA	NA	C	M	M	C	C	M	C	M	C	C
S2_64429103	T/A	2	64429103	+	NA	NA	NA	NA	NA	NA	W	T	T	N	T	T	N	T	T	T
S2_64429104	A/G	2	64429104	+	NA	NA	NA	NA	NA	NA	G	R	A	N	G	A	N	A	G	G
S2_64429109	T/C	2	64429109	+	NA	NA	NA	NA	NA	NA	Y	T	T	N	T	T	N	T	T	T
S2_64429145	A/C	2	64429145	+	NA	NA	NA	NA	NA	NA	M	A	A	N	A	A	N	A	A	A
S2_64429154	T/C	2	64429154	+	NA	NA	NA	NA	NA	NA	Y	T	T	N	T	T	N	T	T	T
S2_65126353	A/G	2	65126353	+	NA	NA	NA	NA	NA	NA	A	A	A	A	A	R	R	R	R	R
S2_65126359	C/T	2	65126359	+	NA	NA	NA	NA	NA	NA	C	C	C	C	C	Y	Y	Y	Y	Y
S2_65350978	A/G	2	65350978	+	NA	NA	NA	NA	NA	NA	A	N	G	A	A	R	A	G	A	A
S2_65391714	A/T	2	65391714	+	NA	NA	NA	NA	NA	NA	A	A	A	N	A	A	A	A	A	A
S2_65725977	A/G	2	65725977	+	NA	NA	NA	NA	NA	NA	A	A	A	A	A	A	A	A	A	A
S2_65725985	A/G	2	65725985	+	NA	NA	NA	NA	NA	NA	A	A	A	A	A	A	A	A	A	A
S2_66274143	G/T	2	66274143	+	NA	NA	NA	NA	NA	NA	G	G	G	G	G	G	G	G	G	G
S2_66399518	A/G	2	66399518	+	NA	NA	NA	NA	NA	NA	A	A	N	A	A	A	N	A	A	N
S2_67032237	A/C	2	67032237	+	NA	NA	NA	NA	NA	NA	A	C	C	A	A	M	A	C	A	A
S2_67032269	T/C	2	67032269	+	NA	NA	NA	NA	NA	NA	T	C	C	T	T	Y	T	C	T	T
S2_67032273	A/G	2	67032273	+	NA	NA	NA	NA	NA	NA	A	G	G	A	A	R	A	G	A	A
S2_67345288	T/G	2	67345288	+	NA	NA	NA	NA	NA	NA	K	K	K	K	K	K	K	K	K	K
S2_67346425	T/C	2	67346425	+	NA	NA	NA	NA	NA	NA	T	T	T	T	Y	T	T	T	T	T
S2_67346460	A/G	2	67346460	+	NA	NA	NA	NA	NA	NA	A	A	A	A	A	A	A	A	A	A
S2_67346467	A/C	2	67346467	+	NA	NA	NA	NA	NA	NA	A	A	A	A	A	A	A	A	A	A
S2_67346717	T/C	2	67346717	+	NA	NA	NA	NA	NA	NA	N	T	N	T	T	T	T	N	T	T
S2_67346746	C/T	2	67346746	+	NA	NA	NA	NA	NA	NA	N	C	N	C	C	C	C	N	C	C
S2_67346753	C/A	2	67346753	+	NA	NA	NA	NA	NA	NA	C	N	N	C	C	M	N	C	C	C
S2_67581116	T/A	2	67581116	+	NA	NA	NA	NA	NA	NA	T	N	N	T	T	T	T	T	T	T
S2_67581126	C/G	2	67581126	+	NA	NA	NA	NA	NA	NA	C	N	N	C	C	C	C	C	C	C
S2_67581127	G/C	2	67581127	+	NA	NA	NA	NA	NA	NA	C	N	N	C	C	C	C	C	C	C
S2_67592791	T/C	2	67592791	+	NA	NA	NA	NA	NA	NA	N	T	N	C	T	N	N	N	N	N
S2_67592798	G/A	2	67592798	+	NA	NA	NA	NA	NA	NA	N	G	N	A	G	N	N	N	N	N
S2_67592812	T/G	2	67592812	+	NA	NA	NA	NA	NA	NA	N	T	N	G	T	N	N	N	N	N
S2_67915612	A/G	2	67915612	+	NA	NA	NA	NA	NA	NA	A	N	G	A	A	R	A	N	A	A
S2_67915707	C/A	2	67915707	+	NA	NA	NA	NA	NA	NA	C	C	C	C	C	C	C	C	C	C
S2_67915744	C/A	2	67915744	+	NA	NA	NA	NA	NA	NA	C	C	C	C	C	C	C	C	C	C
S2_68370037	T/A	2	68370037	+	NA	NA	NA	NA	NA	NA	T	T	N	T	T	T	N	T	T	T
S2_68370086	T/C	2	68370086	+	NA	NA	NA	NA	NA	NA	N	T	N	T	T	T	T	T	T	T
S2_68370099	A/G	2	68370099	+	NA	NA	NA	NA	NA	NA	N	A	N	A	A	G	A	A	A	R
S2_68370117	T/C	2	68370117	+	NA	NA	NA	NA	NA	NA	N	T	N	T	T	T	T	T	Y	T
S2_69280266	T/C	2	69280266	+	NA	NA	NA	NA	NA	NA	Y	T	Y	T	T	T	Y	T	T	T
S2_69280291	A/T	2	69280291	+	NA	NA	NA	NA	NA	NA	W	W	A	W	W	W	N	T	W	W
S2_69280321	G/A	2	69280321	+	NA	NA	NA	NA	NA	NA	R	R	R	R	R	R	R	G	R	R
S2_69280338	T/G	2	69280338	+	NA	NA	NA	NA	NA	NA	T	N	K	T	T	T	T	T	T	T
S2_69721225	T/A	2	69721225	+	NA	NA	NA	NA	NA	NA	T	T	T	T	T	W	W	W	W	T
S2_69721237	T/C	2	69721237	+	NA	NA	NA	NA	NA	NA	C	T	T	Y	Y	Y	Y	T	Y	C
S2_69834946	C/T	2	69834946	+	NA	NA	NA	NA	NA	NA	Y	C	C	Y	Y	C	Y	C	Y	Y
S2_70003458	C/A	2	70003458	+	NA	NA	NA	NA	NA	NA	C	C	C	C	C	C	C	M	C	C
S2_70271158	G/A	2	70271158	+	NA	NA	NA	NA	NA	NA	G	G	G	G	G	G	G	G	G	G
S2_70271238	G/A	2	70271238	+	NA	NA	NA	NA	NA	NA	G	A	A	G	G	R	G	A	G	G
S2_71763473	A/G	2	71763473	+	NA	NA	NA	NA	NA	NA	G	N	N	G	N	G	N	G	G	N
S2_71809774	G/A	2	71809774	+	NA	NA	NA	NA	NA	NA	A	A	A	A	A	A	A	A	A	A
S2_72419036	A/G	2	72419036	+	NA	NA	NA	NA	NA	NA	A	A	A	A	A	A	A	A	A	A
S2_73042718	C/T	2	73042718	+	NA	NA	NA	NA	NA	NA	C	C	C	C	C	C	C	C	C	C
S2_73042752	G/A	2	73042752	+	NA	NA	NA	NA	NA	NA	G	G	G	G	G	G	G	G	G	G
S2_73042753	T/C	2	73042753	+	NA	NA	NA	NA	NA	NA	T	T	T	T	T	T	T	T	T	T
S2_73374446	A/G	2	73374446	+	NA	NA	NA	NA	NA	NA	A	G	G	A	A	R	A	G	A	A
S2_73386043	A/C	2	73386043	+	NA	NA	NA	NA	NA	NA	A	A	A	A	A	A	A	M	A	A
S2_73561992	A/G	2	73561992	+	NA	NA	NA	NA	NA	NA	N	N	N	A	R	N	R	G	R	A
S2_73561995	G/A	2	73561995	+	NA	NA	NA	NA	NA	NA	N	N	N	G	R	N	R	A	R	G
S2_73562025	T/C	2	73562025	+	NA	NA	NA	NA	NA	NA	T	T	T	Y	T	T	T	T	T	T
S2_73562065	T/C	2	73562065	+	NA	NA	NA	NA	NA	NA	T	T	T	T	T	T	T	N	T	T
S2_74184966	T/C	2	74184966	+	NA	NA	NA	NA	NA	NA	T	T	T	T	T	T	T	T	T	T
S2_74579469	C/A	2	74579469	+	NA	NA	NA	NA	NA	NA	C	N	N	N	C	M	C	N	M	C
S2_74579477	A/G	2	74579477	+	NA	NA	NA	NA	NA	NA	A	N	N	N	A	R	A	N	R	A
S2_74632749	A/G	2	74632749	+	NA	NA	NA	NA	NA	NA	A	G	N	A	A	R	A	G	A	A
S2_74840435	C/T	2	74840435	+	NA	NA	NA	NA	NA	NA	C	Y	Y	C	Y	C	Y	C	C	Y
S2_74840441	C/T	2	74840441	+	NA	NA	NA	NA	NA	NA	C	Y	Y	C	Y	C	Y	C	C	Y
S2_74840449	A/G	2	74840449	+	NA	NA	NA	NA	NA	NA	A	R	R	A	A	R	A	R	A	A
S2_74840460	G/A	2	74840460	+	NA	NA	NA	NA	NA	NA	G	G	G	G	G	G	G	G	G	G
S2_75282788	T/G	2	75282788	+	NA	NA	NA	NA	NA	NA	N	N	N	N	N	N	N	N	N	N
S2_75282789	A/T	2	75282789	+	NA	NA	NA	NA	NA	NA	N	N	N	N	N	N	N	N	N	N
S2_75282790	G/T	2	75282790	+	NA	NA	NA	NA	NA	NA	N	N	N	N	N	N	N	N	N	N
S2_75282816	G/A	2	75282816	+	NA	NA	NA	NA	NA	NA	N	N	N	N	N	N	N	N	G	N
S2_75282825	G/A	2	75282825	+	NA	NA	NA	NA	NA	NA	N	N	N	N	N	N	N	N	G	N
S2_76606721	G/A	2	76606721	+	NA	NA	NA	NA	NA	NA	G	G	G	G	G	G	G	G	G	G
S2_76606723	A/C	2	76606723	+	NA	NA	NA	NA	NA	NA	M	M	M	M	M	M	M	M	M	M
S2_76606725	G/A	2	76606725	+	NA	NA	NA	NA	NA	NA	R	G	G	G	G	G	G	G	G	G
S2_76606730	G/A	2	76606730	+	NA	NA	NA	NA	NA	NA	G	R	R	G	G	R	G	R	G	G
S2_76606735	C/A	2	76606735	+	NA	NA	NA	NA	NA	NA	M	C	C	C	C	C	C	C	C	C
S2_76606741	G/T	2	76606741	+	NA	NA	NA	NA	NA	NA	G	G	G	G	G	G	G	G	G	G
S2_76606746	C/T	2	76606746	+	NA	NA	NA	NA	NA	NA	Y	Y	Y	Y	Y	Y	Y	Y	Y	Y
S2_76606748	G/A	2	76606748	+	NA	NA	NA	NA	NA	NA	R	G	G	G	G	G	G	G	G	G
S2_76606750	G/A	2	76606750	+	NA	NA	NA	NA	NA	NA	R	R	R	R	R	R	R	R	R	R
S2_76606755	G/A	2	76606755	+	NA	NA	NA	NA	NA	NA	G	G	G	G	G	G	G	G	G	G
S2_76606760	C/T	2	76606760	+	NA	NA	NA	NA	NA	NA	Y	C	C	C	C	C	C	C	C	C
S2_76606764	G/T	2	76606764	+	NA	NA	NA	NA	NA	NA	G	G	G	G	G	G	G	G	G	G
S2_76606810	T/C	2	76606810	+	NA	NA	NA	NA	NA	NA	T	C	C	T	T	Y	T	C	T	T
S2_76606818	G/A	2	76606818	+	NA	NA	NA	NA	NA	NA	G	A	A	G	G	R	G	A	G	G
S2_76760983	A/G	2	76760983	+	NA	NA	NA	NA	NA	NA	A	A	A	A	A	R	R	R	R	R
S2_76779731	T/A	2	76779731	+	NA	NA	NA	NA	NA	NA	T	T	T	T	T	T	T	T	W	N
S2_76989869	T/C	2	76989869	+	NA	NA	NA	NA	NA	NA	T	T	Y	T	T	T	T	T	T	T
S2_77463150	T/C	2	77463150	+	NA	NA	NA	NA	NA	NA	T	N	T	T	N	T	T	T	T	T
S2_77596681	A/T	2	77596681	+	NA	NA	NA	NA	NA	NA	A	W	W	A	A	A	A	W	A	A
S2_77596687	A/C	2	77596687	+	NA	NA	NA	NA	NA	NA	A	M	A	A	M	A	A	A	A	M
S2_77596705	T/C	2	77596705	+	NA	NA	NA	NA	NA	NA	T	T	T	T	T	T	T	T	T	T
S2_77596707	C/A	2	77596707	+	NA	NA	NA	NA	NA	NA	C	M	M	C	C	C	C	M	C	C
S2_78564373	C/T	2	78564373	+	NA	NA	NA	NA	NA	NA	C	C	N	C	C	C	C	C	C	C
S2_79006125	A/C	2	79006125	+	NA	NA	NA	NA	NA	NA	M	A	A	M	M	A	M	M	M	M
S2_79006129	G/A	2	79006129	+	NA	NA	NA	NA	NA	NA	R	G	G	R	R	G	R	G	R	R
S2_79006177	T/A	2	79006177	+	NA	NA	NA	NA	NA	NA	W	T	T	W	W	T	W	T	W	W
S2_79006195	C/T	2	79006195	+	NA	NA	NA	NA	NA	NA	Y	C	C	Y	Y	C	Y	C	Y	Y
S2_79080997	A/G	2	79080997	+	NA	NA	NA	NA	NA	NA	A	G	G	A	A	R	A	G	A	A
S2_79081007	G/A	2	79081007	+	NA	NA	NA	NA	NA	NA	G	G	G	G	G	G	G	G	G	G
S2_79115962	A/C	2	79115962	+	NA	NA	NA	NA	NA	NA	A	C	C	A	A	M	A	C	A	A
S2_79143374	A/C	2	79143374	+	NA	NA	NA	NA	NA	NA	A	C	C	A	A	M	A	C	A	A
S2_79143378	C/A	2	79143378	+	NA	NA	NA	NA	NA	NA	C	A	A	C	C	M	C	A	C	C
S2_79357213	A/T	2	79357213	+	NA	NA	NA	NA	NA	NA	A	A	A	A	A	A	N	A	A	N
S2_79387585	T/C	2	79387585	+	NA	NA	NA	NA	NA	NA	T	T	N	T	Y	Y	N	N	Y	Y
S2_79528161	C/T	2	79528161	+	NA	NA	NA	NA	NA	NA	C	C	C	C	C	C	C	C	C	C
S2_79528202	A/G	2	79528202	+	NA	NA	NA	NA	NA	NA	A	A	N	A	A	N	A	A	R	R
S2_79528203	T/A	2	79528203	+	NA	NA	NA	NA	NA	NA	T	N	T	T	T	T	T	T	T	T
S2_79528204	G/A	2	79528204	+	NA	NA	NA	NA	NA	NA	G	G	G	G	G	G	G	G	G	G
S2_79528205	C/A	2	79528205	+	NA	NA	NA	NA	NA	NA	C	C	M	C	C	C	C	C	C	C
S2_79528206	A/G	2	79528206	+	NA	NA	NA	NA	NA	NA	R	R	R	R	R	R	R	R	R	R
S2_79528209	A/C	2	79528209	+	NA	NA	NA	NA	NA	NA	A	A	A	A	A	A	A	A	A	A
S2_79556121	C/T	2	79556121	+	NA	NA	NA	NA	NA	NA	C	N	N	C	C	C	C	T	C	C
S2_80994099	A/G	2	80994099	+	NA	NA	NA	NA	NA	NA	R	R	R	R	R	R	R	R	R	R
S2_80994101	A/G	2	80994101	+	NA	NA	NA	NA	NA	NA	R	R	R	R	R	R	R	R	R	R
S2_80994128	C/T	2	80994128	+	NA	NA	NA	NA	NA	NA	Y	Y	Y	C	Y	Y	C	Y	C	Y
S2_81440555	A/G	2	81440555	+	NA	NA	NA	NA	NA	NA	A	A	A	A	A	A	A	A	A	A
S2_81440570	A/G	2	81440570	+	NA	NA	NA	NA	NA	NA	A	R	A	A	A	A	R	A	A	A
S2_81885302	C/G	2	81885302	+	NA	NA	NA	NA	NA	NA	C	G	N	C	C	S	C	G	C	C
S2_81990800	G/A	2	81990800	+	NA	NA	NA	NA	NA	NA	G	G	G	G	G	G	G	G	G	G
S2_82090970	T/C	2	82090970	+	NA	NA	NA	NA	NA	NA	T	C	C	T	T	Y	T	C	T	T
S2_82143857	C/G	2	82143857	+	NA	NA	NA	NA	NA	NA	C	G	G	C	C	S	C	G	C	C
S2_82143883	A/C	2	82143883	+	NA	NA	NA	NA	NA	NA	A	C	C	A	A	M	A	C	A	A
S2_82409836	G/A	2	82409836	+	NA	NA	NA	NA	NA	NA	G	G	G	G	N	G	G	N	G	N
S2_82409852	G/A	2	82409852	+	NA	NA	NA	NA	NA	NA	G	G	G	G	N	G	G	N	G	N
S2_82409860	C/T	2	82409860	+	NA	NA	NA	NA	NA	NA	C	C	C	C	N	C	C	N	C	N
S2_82409881	G/C	2	82409881	+	NA	NA	NA	NA	NA	NA	G	G	G	G	N	G	G	N	G	N
S2_82894941	G/C	2	82894941	+	NA	NA	NA	NA	NA	NA	G	C	N	N	G	N	G	N	N	G
S2_82895018	A/G	2	82895018	+	NA	NA	NA	NA	NA	NA	A	G	N	N	A	R	N	N	A	A
S2_83022762	T/C	2	83022762	+	NA	NA	NA	NA	NA	NA	T	T	T	N	T	T	T	T	T	T
S2_83042485	G/A	2	83042485	+	NA	NA	NA	NA	NA	NA	G	R	G	R	R	G	G	R	R	R
S2_83388288	A/T	2	83388288	+	NA	NA	NA	NA	NA	NA	A	A	A	A	A	A	A	N	A	A
S2_83399401	A/C	2	83399401	+	NA	NA	NA	NA	NA	NA	A	M	A	M	A	M	A	A	A	A
S2_83399457	T/C	2	83399457	+	NA	NA	NA	NA	NA	NA	T	T	N	T	T	T	T	T	T	T
S2_83961518	C/A	2	83961518	+	NA	NA	NA	NA	NA	NA	A	N	A	C	C	M	C	A	C	N
S2_84055693	G/A	2	84055693	+	NA	NA	NA	NA	NA	NA	R	G	G	N	R	G	R	N	R	R
S2_84055706	C/A	2	84055706	+	NA	NA	NA	NA	NA	NA	M	C	C	N	C	C	C	N	C	C
S2_84055720	C/T	2	84055720	+	NA	NA	NA	NA	NA	NA	C	Y	Y	N	C	T	C	N	C	C
S2_84055722	G/A	2	84055722	+	NA	NA	NA	NA	NA	NA	R	G	G	N	G	G	G	N	G	G
S2_84055723	T/C	2	84055723	+	NA	NA	NA	NA	NA	NA	Y	T	T	N	T	T	T	N	T	T
S2_84055732	A/G	2	84055732	+	NA	NA	NA	NA	NA	NA	R	A	A	N	A	A	A	N	A	A
S2_84056354	T/A	2	84056354	+	NA	NA	NA	NA	NA	NA	T	W	W	T	T	W	T	A	T	T
S2_84160687	C/T	2	84160687	+	NA	NA	NA	NA	NA	NA	C	N	N	C	Y	C	C	N	C	C
S2_84160691	G/A	2	84160691	+	NA	NA	NA	NA	NA	NA	G	N	N	G	R	G	G	N	G	G
S2_84160705	T/C	2	84160705	+	NA	NA	NA	NA	NA	NA	T	N	N	T	Y	T	T	N	T	T
S2_84160714	C/G	2	84160714	+	NA	NA	NA	NA	NA	NA	C	N	N	C	C	C	C	N	C	C
S2_84160723	A/G	2	84160723	+	NA	NA	NA	NA	NA	NA	A	N	N	A	A	A	A	N	A	A
S2_84214468	A/G	2	84214468	+	NA	NA	NA	NA	NA	NA	A	A	A	A	A	A	A	A	A	A
S2_84329855	T/C	2	84329855	+	NA	NA	NA	NA	NA	NA	T	N	N	T	T	T	Y	N	T	T
S2_84778133	C/T	2	84778133	+	NA	NA	NA	NA	NA	NA	C	C	N	C	C	C	C	C	C	C
S2_84786573	C/T	2	84786573	+	NA	NA	NA	NA	NA	NA	C	C	C	C	C	C	C	N	C	C
S2_84786592	C/T	2	84786592	+	NA	NA	NA	NA	NA	NA	C	T	T	C	C	T	C	N	C	C
S2_84786681	C/T	2	84786681	+	NA	NA	NA	NA	NA	NA	C	T	N	C	C	N	C	N	C	C
S2_84786685	T/C	2	84786685	+	NA	NA	NA	NA	NA	NA	T	T	N	T	T	N	T	N	T	T
S2_84786691	A/G	2	84786691	+	NA	NA	NA	NA	NA	NA	A	A	N	A	A	N	A	N	A	A
S2_84786697	A/G	2	84786697	+	NA	NA	NA	NA	NA	NA	A	A	N	A	A	N	A	N	A	A
S2_84786712	A/C	2	84786712	+	NA	NA	NA	NA	NA	NA	A	A	N	A	A	N	A	N	A	A
S2_84795152	G/C	2	84795152	+	NA	NA	NA	NA	NA	NA	S	S	S	S	S	S	S	S	S	S
S2_86093176	G/A	2	86093176	+	NA	NA	NA	NA	NA	NA	G	R	G	G	G	R	G	R	G	G
S2_86093185	C/T	2	86093185	+	NA	NA	NA	NA	NA	NA	C	Y	C	C	C	Y	C	Y	C	C
S2_86093211	T/C	2	86093211	+	NA	NA	NA	NA	NA	NA	T	Y	T	T	T	Y	T	Y	T	T
S2_86200889	T/C	2	86200889	+	NA	NA	NA	NA	NA	NA	C	T	T	C	C	Y	C	T	C	C
S2_86238586	A/T	2	86238586	+	NA	NA	NA	NA	NA	NA	A	A	A	A	A	A	A	A	A	A
S2_86285280	A/T	2	86285280	+	NA	NA	NA	NA	NA	NA	A	A	A	A	A	A	A	A	A	A
S2_86696493	G/A	2	86696493	+	NA	NA	NA	NA	NA	NA	G	A	A	G	G	R	G	A	G	G
S2_87213160	A/G	2	87213160	+	NA	NA	NA	NA	NA	NA	A	A	A	A	A	A	A	A	A	A
S2_87213210	C/T	2	87213210	+	NA	NA	NA	NA	NA	NA	C	T	N	C	C	T	C	T	C	C
S2_87218218	A/C	2	87218218	+	NA	NA	NA	NA	NA	NA	A	A	A	A	A	A	A	A	A	A
S2_87218246	A/T	2	87218246	+	NA	NA	NA	NA	NA	NA	W	A	A	W	W	A	A	A	W	W
S2_87218263	G/C	2	87218263	+	NA	NA	NA	NA	NA	NA	G	G	G	G	G	G	G	G	G	G
S2_87264605	T/G	2	87264605	+	NA	NA	NA	NA	NA	NA	G	K	K	G	G	G	T	T	T	K
S2_87264621	A/T	2	87264621	+	NA	NA	NA	NA	NA	NA	T	W	W	T	T	T	A	A	A	W
S2_87264637	C/T	2	87264637	+	NA	NA	NA	NA	NA	NA	C	Y	Y	C	C	C	C	T	Y	Y
S2_87264647	C/T	2	87264647	+	NA	NA	NA	NA	NA	NA	T	Y	Y	T	T	T	C	C	C	Y
S2_87264655	C/A	2	87264655	+	NA	NA	NA	NA	NA	NA	A	M	M	A	A	A	A	C	M	M
S2_87266070	C/T	2	87266070	+	NA	NA	NA	NA	NA	NA	C	C	Y	C	C	Y	Y	Y	C	C
S2_87313100	G/A	2	87313100	+	NA	NA	NA	NA	NA	NA	R	N	R	R	G	R	R	R	R	G
S2_87313106	C/T	2	87313106	+	NA	NA	NA	NA	NA	NA	C	N	C	C	C	C	C	C	C	C
S2_87453909	T/A	2	87453909	+	NA	NA	NA	NA	NA	NA	T	W	T	T	T	W	T	W	T	T
S2_87453942	G/C	2	87453942	+	NA	NA	NA	NA	NA	NA	G	S	S	S	S	S	S	S	S	S
S2_87453962	C/T	2	87453962	+	NA	NA	NA	NA	NA	NA	C	Y	T	Y	Y	Y	Y	Y	Y	Y
S2_87558565	A/T	2	87558565	+	NA	NA	NA	NA	NA	NA	T	W	W	W	T	W	T	W	T	T
S2_87558604	C/T	2	87558604	+	NA	NA	NA	NA	NA	NA	T	Y	Y	Y	T	Y	T	Y	T	T
S2_87558927	A/C	2	87558927	+	NA	NA	NA	NA	NA	NA	C	N	N	C	C	C	C	N	C	C
S2_87558953	G/C	2	87558953	+	NA	NA	NA	NA	NA	NA	G	N	N	G	G	G	G	N	G	G
S2_87558962	C/A	2	87558962	+	NA	NA	NA	NA	NA	NA	A	N	N	A	A	A	A	N	A	A
S2_87558999	A/G	2	87558999	+	NA	NA	NA	NA	NA	NA	A	A	A	A	A	A	A	A	A	A
S2_87595681	A/C	2	87595681	+	NA	NA	NA	NA	NA	NA	M	A	M	M	A	A	M	M	A	A
S2_87595693	A/G	2	87595693	+	NA	NA	NA	NA	NA	NA	R	R	R	R	R	R	R	R	R	R
S2_87595710	T/C	2	87595710	+	NA	NA	NA	NA	NA	NA	T	T	T	T	T	T	T	T	T	T
S2_87595727	A/G	2	87595727	+	NA	NA	NA	NA	NA	NA	R	R	R	R	R	R	R	R	R	R
S2_88267670	A/C	2	88267670	+	NA	NA	NA	NA	NA	NA	N	C	C	A	A	M	A	N	A	A
S2_88267682	C/G	2	88267682	+	NA	NA	NA	NA	NA	NA	N	G	G	C	C	S	C	N	C	C
S2_88306827	T/A	2	88306827	+	NA	NA	NA	NA	NA	NA	N	A	A	T	T	T	T	A	T	T
S2_88558740	A/G	2	88558740	+	NA	NA	NA	NA	NA	NA	A	G	G	A	A	R	A	G	A	A
S2_89168177	T/C	2	89168177	+	NA	NA	NA	NA	NA	NA	Y	T	Y	Y	Y	T	T	T	T	T
S2_89168183	G/T	2	89168183	+	NA	NA	NA	NA	NA	NA	G	G	G	K	G	G	G	G	G	G
S2_89328998	C/A	2	89328998	+	NA	NA	NA	NA	NA	NA	M	A	M	M	M	M	M	M	M	C
S2_90136795	T/C	2	90136795	+	NA	NA	NA	NA	NA	NA	T	T	T	T	T	T	N	T	T	T
S2_90136810	C/A	2	90136810	+	NA	NA	NA	NA	NA	NA	C	C	C	C	C	C	N	C	C	C
S2_90136818	A/T	2	90136818	+	NA	NA	NA	NA	NA	NA	A	A	A	A	A	A	N	A	A	A
S2_90136821	A/G	2	90136821	+	NA	NA	NA	NA	NA	NA	A	A	A	A	A	A	N	A	A	A
S2_90136868	C/A	2	90136868	+	NA	NA	NA	NA	NA	NA	C	C	C	C	C	C	N	C	C	C
S2_90421268	C/T	2	90421268	+	NA	NA	NA	NA	NA	NA	T	T	Y	T	Y	Y	N	N	Y	Y
S2_90421297	A/C	2	90421297	+	NA	NA	NA	NA	NA	NA	C	C	M	C	M	M	N	N	M	M
S2_91632997	T/C	2	91632997	+	NA	NA	NA	NA	NA	NA	Y	T	C	Y	Y	Y	Y	N	Y	T
S2_91632998	T/G	2	91632998	+	NA	NA	NA	NA	NA	NA	K	T	G	K	K	K	K	N	K	T
S2_91633004	T/C	2	91633004	+	NA	NA	NA	NA	NA	NA	T	T	T	T	T	T	T	N	T	T
S2_91633005	G/A	2	91633005	+	NA	NA	NA	NA	NA	NA	R	G	A	R	R	R	R	N	R	G
S2_91791328	T/C	2	91791328	+	NA	NA	NA	NA	NA	NA	T	T	N	T	T	N	T	T	T	T
S2_91920762	A/T	2	91920762	+	NA	NA	NA	NA	NA	NA	A	A	N	A	A	A	A	N	W	A
S2_91920816	A/C	2	91920816	+	NA	NA	NA	NA	NA	NA	A	A	N	A	A	M	A	N	A	A
S2_92563934	T/A	2	92563934	+	NA	NA	NA	NA	NA	NA	N	N	N	T	T	T	T	N	T	N
S2_92879194	A/C	2	92879194	+	NA	NA	NA	NA	NA	NA	A	N	A	A	A	M	A	N	A	A
S2_92879201	C/T	2	92879201	+	NA	NA	NA	NA	NA	NA	C	C	C	C	C	C	C	C	C	C
S2_92951507	G/T	2	92951507	+	NA	NA	NA	NA	NA	NA	G	G	G	G	G	G	G	G	G	G
S2_93019317	A/T	2	93019317	+	NA	NA	NA	NA	NA	NA	A	T	N	A	A	W	A	T	A	A
S2_93700145	G/T	2	93700145	+	NA	NA	NA	NA	NA	NA	N	G	G	G	G	G	G	G	G	G
S2_93719026	C/T	2	93719026	+	NA	NA	NA	NA	NA	NA	C	C	Y	Y	Y	Y	Y	N	Y	C
S2_94265228	A/T	2	94265228	+	NA	NA	NA	NA	NA	NA	A	A	A	A	A	A	N	A	A	A
S2_94265252	A/T	2	94265252	+	NA	NA	NA	NA	NA	NA	A	A	A	A	A	A	A	N	A	A
S2_94784213	A/G	2	94784213	+	NA	NA	NA	NA	NA	NA	R	A	A	A	A	A	A	R	A	A
S2_95114536	A/T	2	95114536	+	NA	NA	NA	NA	NA	NA	A	A	A	A	A	A	A	A	A	A
S2_95114555	C/T	2	95114555	+	NA	NA	NA	NA	NA	NA	C	C	C	C	C	C	C	C	C	C
S2_95256022	A/G	2	95256022	+	NA	NA	NA	NA	NA	NA	A	A	A	A	A	A	A	A	A	A
S2_95256027	G/C	2	95256027	+	NA	NA	NA	NA	NA	NA	G	G	G	G	G	G	G	G	G	G
S2_95256060	C/T	2	95256060	+	NA	NA	NA	NA	NA	NA	Y	Y	Y	Y	Y	Y	Y	Y	Y	Y
S2_95256074	C/A	2	95256074	+	NA	NA	NA	NA	NA	NA	C	C	C	C	C	C	C	C	C	C
S2_95307739	G/A	2	95307739	+	NA	NA	NA	NA	NA	NA	G	G	G	G	G	G	G	G	G	G
S2_95307802	A/C	2	95307802	+	NA	NA	NA	NA	NA	NA	N	M	A	A	A	A	A	A	A	A
S2_95307835	T/C	2	95307835	+	NA	NA	NA	NA	NA	NA	N	T	T	T	T	T	T	T	T	T
S2_95465753	C/A	2	95465753	+	NA	NA	NA	NA	NA	NA	M	C	C	M	M	C	M	C	M	A
S2_95465758	G/T	2	95465758	+	NA	NA	NA	NA	NA	NA	K	G	G	K	K	G	K	G	K	T
S2_95465802	G/A	2	95465802	+	NA	NA	NA	NA	NA	NA	R	G	G	R	R	G	R	G	R	A
S2_95465811	A/G	2	95465811	+	NA	NA	NA	NA	NA	NA	R	A	A	A	A	R	A	A	A	R
S2_95830319	T/C	2	95830319	+	NA	NA	NA	NA	NA	NA	T	T	T	T	T	T	T	T	T	T
S2_96754048	T/A	2	96754048	+	NA	NA	NA	NA	NA	NA	T	W	W	T	T	W	T	W	T	T
S2_97212774	T/C	2	97212774	+	NA	NA	NA	NA	NA	NA	T	T	T	T	T	T	N	T	T	T
S2_97212811	G/A	2	97212811	+	NA	NA	NA	NA	NA	NA	G	G	G	G	G	G	N	G	G	G
S2_97640085	T/G	2	97640085	+	NA	NA	NA	NA	NA	NA	N	T	N	T	T	N	N	T	T	T
S2_98145286	T/C	2	98145286	+	NA	NA	NA	NA	NA	NA	T	N	N	T	T	T	Y	N	Y	T
S2_98220104	T/A	2	98220104	+	NA	NA	NA	NA	NA	NA	T	A	A	T	T	W	T	A	T	T
S2_98334595	C/T	2	98334595	+	NA	NA	NA	NA	NA	NA	C	C	N	C	C	C	C	N	N	C
S2_98334693	T/C	2	98334693	+	NA	NA	NA	NA	NA	NA	N	N	T	T	T	T	T	T	T	T
S2_98739792	T/A	2	98739792	+	NA	NA	NA	NA	NA	NA	T	T	W	W	W	W	W	W	W	W
S2_98739827	C/T	2	98739827	+	NA	NA	NA	NA	NA	NA	C	C	Y	Y	Y	Y	Y	Y	C	C
S2_98836457	A/C	2	98836457	+	NA	NA	NA	NA	NA	NA	A	A	N	M	M	M	A	M	M	A
S2_98836468	T/C	2	98836468	+	NA	NA	NA	NA	NA	NA	T	T	N	Y	T	T	T	T	T	T
S2_98998719	T/A	2	98998719	+	NA	NA	NA	NA	NA	NA	T	A	A	T	T	W	T	A	T	T
S2_98998729	C/T	2	98998729	+	NA	NA	NA	NA	NA	NA	C	T	T	C	C	T	C	T	C	C
S2_99228218	A/T	2	99228218	+	NA	NA	NA	NA	NA	NA	A	N	N	A	A	A	A	N	A	A
S2_99228247	A/C	2	99228247	+	NA	NA	NA	NA	NA	NA	A	N	N	M	A	A	A	N	A	A
S2_99228259	G/A	2	99228259	+	NA	NA	NA	NA	NA	NA	G	N	N	G	G	G	G	N	G	G
S2_99347506	T/G	2	99347506	+	NA	NA	NA	NA	NA	NA	T	K	T	T	K	K	K	T	K	T
S2_99380535	A/G	2	99380535	+	NA	NA	NA	NA	NA	NA	A	A	N	A	A	A	A	A	A	A
S2_99380544	T/A	2	99380544	+	NA	NA	NA	NA	NA	NA	T	T	N	T	T	T	T	T	T	T
S2_99380555	T/A	2	99380555	+	NA	NA	NA	NA	NA	NA	T	T	N	T	T	W	T	T	T	T
S2_99380591	C/T	2	99380591	+	NA	NA	NA	NA	NA	NA	C	T	T	C	C	Y	C	T	C	C
S2_99380593	T/G	2	99380593	+	NA	NA	NA	NA	NA	NA	T	G	G	T	T	K	T	G	T	T
S2_99399750	T/G	2	99399750	+	NA	NA	NA	NA	NA	NA	T	N	T	T	T	T	T	T	T	N
S2_99549510	G/C	2	99549510	+	NA	NA	NA	NA	NA	NA	N	G	G	S	G	S	S	N	G	G
S2_99549522	G/A	2	99549522	+	NA	NA	NA	NA	NA	NA	N	G	G	G	G	G	G	N	G	G
S2_99549545	G/A	2	99549545	+	NA	NA	NA	NA	NA	NA	N	G	G	G	G	G	G	N	G	G
S2_99588217	T/C	2	99588217	+	NA	NA	NA	NA	NA	NA	Y	T	T	N	N	T	N	T	N	N
S2_99588247	G/T	2	99588247	+	NA	NA	NA	NA	NA	NA	K	T	T	N	N	T	N	T	N	N
S2_99787857	A/C	2	99787857	+	NA	NA	NA	NA	NA	NA	N	A	A	A	A	A	A	N	A	A
S2_99787988	A/G	2	99787988	+	NA	NA	NA	NA	NA	NA	R	R	A	R	R	R	R	A	R	R
S2_99787993	C/G	2	99787993	+	NA	NA	NA	NA	NA	NA	C	S	S	S	S	S	S	C	S	C
S2_99787995	C/A	2	99787995	+	NA	NA	NA	NA	NA	NA	M	M	C	M	M	M	M	C	M	M
S2_99788002	A/G	2	99788002	+	NA	NA	NA	NA	NA	NA	R	R	A	R	R	R	R	A	R	R
S2_99788018	G/T	2	99788018	+	NA	NA	NA	NA	NA	NA	G	G	G	K	G	G	G	G	G	G
S2_99788026	C/A	2	99788026	+	NA	NA	NA	NA	NA	NA	C	C	C	M	C	C	C	C	M	C
S2_100086309	C/T	2	100086309	+	NA	NA	NA	NA	NA	NA	C	Y	Y	C	C	C	C	Y	C	N
S2_100155638	A/T	2	100155638	+	NA	NA	NA	NA	NA	NA	A	W	A	A	W	A	A	N	A	T
S2_100155655	A/T	2	100155655	+	NA	NA	NA	NA	NA	NA	A	W	A	W	W	W	A	A	A	A
S2_100155658	C/A	2	100155658	+	NA	NA	NA	NA	NA	NA	C	C	C	M	C	C	C	C	C	C
S2_100155663	T/A	2	100155663	+	NA	NA	NA	NA	NA	NA	T	T	T	W	W	W	A	T	W	W
S2_100155669	A/T	2	100155669	+	NA	NA	NA	NA	NA	NA	A	A	A	A	A	A	A	N	A	A
S2_100423730	G/T	2	100423730	+	NA	NA	NA	NA	NA	NA	G	G	G	G	G	G	G	G	G	G
S2_100721659	G/C	2	100721659	+	NA	NA	NA	NA	NA	NA	C	S	S	C	S	S	C	S	S	C
S2_100721674	A/T	2	100721674	+	NA	NA	NA	NA	NA	NA	N	W	N	N	W	N	N	W	W	T
S2_100721707	T/C	2	100721707	+	NA	NA	NA	NA	NA	NA	Y	Y	Y	C	Y	Y	C	N	Y	Y
S2_100721713	T/A	2	100721713	+	NA	NA	NA	NA	NA	NA	W	W	W	A	W	W	A	N	W	W
S2_100721727	C/A	2	100721727	+	NA	NA	NA	NA	NA	NA	M	M	M	A	M	M	A	N	M	M
S2_100721731	G/A	2	100721731	+	NA	NA	NA	NA	NA	NA	R	R	R	A	R	R	A	N	R	R
S2_100821429	T/G	2	100821429	+	NA	NA	NA	NA	NA	NA	T	T	T	T	T	T	T	N	T	T
S2_101143696	C/A	2	101143696	+	NA	NA	NA	NA	NA	NA	A	M	M	C	C	M	C	A	C	C
S2_101143723	G/A	2	101143723	+	NA	NA	NA	NA	NA	NA	G	R	R	G	G	R	G	G	G	G
S2_101143808	G/A	2	101143808	+	NA	NA	NA	NA	NA	NA	G	A	A	N	G	R	G	R	G	G
S2_101260449	C/A	2	101260449	+	NA	NA	NA	NA	NA	NA	M	A	A	C	M	M	M	N	M	M
S2_101319947	C/A	2	101319947	+	NA	NA	NA	NA	NA	NA	C	C	C	C	C	C	C	C	C	C
S2_101319949	G/A	2	101319949	+	NA	NA	NA	NA	NA	NA	G	G	G	G	G	G	G	G	G	G
S2_101319964	A/T	2	101319964	+	NA	NA	NA	NA	NA	NA	A	A	A	A	A	A	A	A	A	A
S2_101319979	G/A	2	101319979	+	NA	NA	NA	NA	NA	NA	G	A	G	G	R	R	G	G	G	G
S2_101319991	A/G	2	101319991	+	NA	NA	NA	NA	NA	NA	A	A	A	A	A	A	A	A	A	A
S2_101319999	T/A	2	101319999	+	NA	NA	NA	NA	NA	NA	T	T	T	T	T	T	T	T	T	T
S2_101865410	G/T	2	101865410	+	NA	NA	NA	NA	NA	NA	G	G	G	G	G	G	G	G	G	G
S2_101865463	G/T	2	101865463	+	NA	NA	NA	NA	NA	NA	G	G	G	G	G	G	G	G	G	G
S2_102232923	G/A	2	102232923	+	NA	NA	NA	NA	NA	NA	G	G	G	G	G	G	G	G	G	G
S2_102564951	A/G	2	102564951	+	NA	NA	NA	NA	NA	NA	A	A	A	N	A	A	N	N	A	A
S2_102564958	G/A	2	102564958	+	NA	NA	NA	NA	NA	NA	R	G	G	N	G	G	N	N	G	G
S2_102564979	T/A	2	102564979	+	NA	NA	NA	NA	NA	NA	T	T	T	N	T	T	N	T	T	W
S2_102564981	T/A	2	102564981	+	NA	NA	NA	NA	NA	NA	T	T	T	N	T	W	N	T	T	T
S2_102564985	T/A	2	102564985	+	NA	NA	NA	NA	NA	NA	T	T	T	N	T	T	N	T	T	T
S2_103453394	A/T	2	103453394	+	NA	NA	NA	NA	NA	NA	A	A	N	A	A	A	A	N	A	W
S2_103552383	A/C	2	103552383	+	NA	NA	NA	NA	NA	NA	A	N	N	A	A	A	A	M	A	A
S2_104144229	C/T	2	104144229	+	NA	NA	NA	NA	NA	NA	C	C	C	N	C	C	N	N	C	N
S2_104558203	C/A	2	104558203	+	NA	NA	NA	NA	NA	NA	C	C	C	C	C	C	C	C	C	C
S2_105099360	T/C	2	105099360	+	NA	NA	NA	NA	NA	NA	T	T	T	T	T	T	T	N	T	T
S2_105826252	G/A	2	105826252	+	NA	NA	NA	NA	NA	NA	G	G	G	G	G	G	G	G	G	G
S2_106791228	T/C	2	106791228	+	NA	NA	NA	NA	NA	NA	T	T	N	T	T	T	T	T	T	N
S2_107753940	G/T	2	107753940	+	NA	NA	NA	NA	NA	NA	G	G	G	G	K	G	G	G	G	N
S2_107983457	G/C	2	107983457	+	NA	NA	NA	NA	NA	NA	S	S	G	G	G	S	G	C	G	G
S2_108021578	T/A	2	108021578	+	NA	NA	NA	NA	NA	NA	T	A	A	T	T	W	T	A	T	T
S2_108021579	T/A	2	108021579	+	NA	NA	NA	NA	NA	NA	T	A	A	T	T	W	T	A	T	T
S2_108021580	T/A	2	108021580	+	NA	NA	NA	NA	NA	NA	T	A	A	T	T	W	T	A	T	T
S2_108021582	G/A	2	108021582	+	NA	NA	NA	NA	NA	NA	G	A	A	G	G	R	G	A	G	G
S2_109818771	A/T	2	109818771	+	NA	NA	NA	NA	NA	NA	A	A	A	A	A	A	A	N	A	A
S2_109834731	T/C	2	109834731	+	NA	NA	NA	NA	NA	NA	T	T	T	T	Y	T	T	N	T	T
S2_110295888	T/C	2	110295888	+	NA	NA	NA	NA	NA	NA	T	Y	Y	Y	Y	Y	Y	T	T	Y
S2_110295906	C/T	2	110295906	+	NA	NA	NA	NA	NA	NA	Y	Y	C	Y	C	C	C	Y	Y	C
S2_110357985	G/A	2	110357985	+	NA	NA	NA	NA	NA	NA	G	A	G	R	A	G	G	R	R	A
S2_111959723	G/C	2	111959723	+	NA	NA	NA	NA	NA	NA	G	G	G	G	G	G	G	G	G	G
S2_112017238	G/A	2	112017238	+	NA	NA	NA	NA	NA	NA	R	R	R	R	R	R	R	R	R	R
S2_112035924	T/C	2	112035924	+	NA	NA	NA	NA	NA	NA	C	C	C	C	C	C	C	C	C	C
S2_113517070	T/A	2	113517070	+	NA	NA	NA	NA	NA	NA	T	T	T	T	T	T	T	N	T	T
S2_113723873	C/T	2	113723873	+	NA	NA	NA	NA	NA	NA	C	T	T	C	C	T	Y	T	C	C
S2_113723943	T/A	2	113723943	+	NA	NA	NA	NA	NA	NA	T	T	T	T	T	T	T	T	T	T
S2_113723967	C/T	2	113723967	+	NA	NA	NA	NA	NA	NA	C	T	T	C	C	T	Y	T	C	C
S2_113723977	A/G	2	113723977	+	NA	NA	NA	NA	NA	NA	A	G	G	A	A	G	R	G	A	A
S2_113723994	A/C	2	113723994	+	NA	NA	NA	NA	NA	NA	A	C	C	A	A	C	M	C	A	A
S2_113723995	G/T	2	113723995	+	NA	NA	NA	NA	NA	NA	G	G	G	G	G	G	G	G	G	G
S2_114745597	C/T	2	114745597	+	NA	NA	NA	NA	NA	NA	N	N	N	N	N	N	N	N	N	N
S2_114745604	T/C	2	114745604	+	NA	NA	NA	NA	NA	NA	N	N	N	N	N	N	N	N	N	N
S2_114745639	A/C	2	114745639	+	NA	NA	NA	NA	NA	NA	N	N	N	N	N	N	N	N	N	N
S2_114745645	C/A	2	114745645	+	NA	NA	NA	NA	NA	NA	N	N	N	N	N	N	N	N	N	N
S2_115533198	G/A	2	115533198	+	NA	NA	NA	NA	NA	NA	G	R	R	G	G	R	G	G	G	G
S2_115533200	G/T	2	115533200	+	NA	NA	NA	NA	NA	NA	G	K	K	G	G	K	G	G	G	G
S2_115533228	C/T	2	115533228	+	NA	NA	NA	NA	NA	NA	C	C	C	C	C	Y	C	Y	Y	C
S2_115533229	T/G	2	115533229	+	NA	NA	NA	NA	NA	NA	T	K	K	K	K	K	K	K	K	G
S2_115533231	T/A	2	115533231	+	NA	NA	NA	NA	NA	NA	T	W	W	T	T	W	T	T	T	T
S2_115533233	T/C	2	115533233	+	NA	NA	NA	NA	NA	NA	T	Y	Y	T	Y	T	T	Y	T	C
S2_115533237	T/C	2	115533237	+	NA	NA	NA	NA	NA	NA	T	T	T	T	T	Y	T	Y	Y	T
S2_115533243	A/G	2	115533243	+	NA	NA	NA	NA	NA	NA	R	R	R	R	R	A	R	A	A	A
S2_115533247	T/C	2	115533247	+	NA	NA	NA	NA	NA	NA	Y	Y	Y	Y	Y	T	Y	T	T	T
S2_115646806	C/T	2	115646806	+	NA	NA	NA	NA	NA	NA	C	T	T	C	C	T	C	T	C	N
S2_115646870	C/T	2	115646870	+	NA	NA	NA	NA	NA	NA	C	C	C	C	C	C	C	C	C	N
S2_115823790	C/T	2	115823790	+	NA	NA	NA	NA	NA	NA	C	N	N	C	C	N	C	N	C	C
S2_115823802	C/T	2	115823802	+	NA	NA	NA	NA	NA	NA	C	N	N	C	C	N	C	N	C	C
S2_115823828	T/A	2	115823828	+	NA	NA	NA	NA	NA	NA	T	N	N	T	T	N	T	N	T	T
S2_116796391	A/C	2	116796391	+	NA	NA	NA	NA	NA	NA	A	N	A	A	A	A	A	A	A	A
S2_116796423	T/C	2	116796423	+	NA	NA	NA	NA	NA	NA	T	N	T	T	T	T	T	T	T	T
S2_116797074	G/T	2	116797074	+	NA	NA	NA	NA	NA	NA	G	G	G	G	G	G	G	G	G	G
S2_116797084	C/T	2	116797084	+	NA	NA	NA	NA	NA	NA	Y	Y	Y	Y	Y	C	Y	Y	Y	Y
S2_116797123	G/T	2	116797123	+	NA	NA	NA	NA	NA	NA	K	G	K	K	G	K	K	K	K	K
S2_116841228	G/C	2	116841228	+	NA	NA	NA	NA	NA	NA	G	G	S	S	G	G	G	G	G	G
S2_116841265	A/T	2	116841265	+	NA	NA	NA	NA	NA	NA	A	A	A	A	A	A	A	A	A	A
S2_116841267	G/T	2	116841267	+	NA	NA	NA	NA	NA	NA	G	G	G	G	G	G	G	G	G	G
S2_116841272	G/A	2	116841272	+	NA	NA	NA	NA	NA	NA	G	G	G	G	G	G	G	G	G	G
S2_116841276	C/T	2	116841276	+	NA	NA	NA	NA	NA	NA	C	C	Y	C	C	C	C	Y	C	C
S2_117226053	A/C	2	117226053	+	NA	NA	NA	NA	NA	NA	A	A	A	A	A	A	A	A	A	A
S2_117350250	T/C	2	117350250	+	NA	NA	NA	NA	NA	NA	T	C	N	N	T	Y	T	C	T	T
S2_117350257	A/G	2	117350257	+	NA	NA	NA	NA	NA	NA	A	G	N	N	A	R	A	G	A	A
S2_117350271	T/G	2	117350271	+	NA	NA	NA	NA	NA	NA	T	T	N	N	K	T	T	T	T	T
S2_117350337	A/G	2	117350337	+	NA	NA	NA	NA	NA	NA	A	A	A	R	A	A	A	N	A	A
S2_117350373	G/A	2	117350373	+	NA	NA	NA	NA	NA	NA	G	A	A	G	G	G	G	N	G	G
S2_118188718	G/A	2	118188718	+	NA	NA	NA	NA	NA	NA	A	G	A	R	G	R	R	G	R	G
S2_118188747	A/G	2	118188747	+	NA	NA	NA	NA	NA	NA	G	A	G	R	A	R	R	A	R	A
S2_118188750	C/A	2	118188750	+	NA	NA	NA	NA	NA	NA	M	C	C	C	C	C	C	C	C	C
S2_118188751	T/A	2	118188751	+	NA	NA	NA	NA	NA	NA	W	T	A	W	T	W	W	T	W	T
S2_118188765	C/A	2	118188765	+	NA	NA	NA	NA	NA	NA	M	C	A	M	C	M	M	C	M	C
S2_118188771	A/T	2	118188771	+	NA	NA	NA	NA	NA	NA	W	A	T	W	A	W	W	A	W	A
S2_118448124	G/A	2	118448124	+	NA	NA	NA	NA	NA	NA	G	A	A	G	G	R	G	A	G	G
S2_118448192	C/T	2	118448192	+	NA	NA	NA	NA	NA	NA	C	C	C	C	C	C	C	C	C	C
S2_118448197	A/G	2	118448197	+	NA	NA	NA	NA	NA	NA	A	A	A	A	A	A	R	A	A	A
S2_118870144	A/G	2	118870144	+	NA	NA	NA	NA	NA	NA	R	R	R	R	R	R	R	R	R	R
S2_118870196	T/C	2	118870196	+	NA	NA	NA	NA	NA	NA	Y	Y	Y	Y	Y	Y	Y	Y	Y	Y
S2_119373056	T/G	2	119373056	+	NA	NA	NA	NA	NA	NA	T	T	T	T	T	T	T	T	T	T
S2_119373072	T/C	2	119373072	+	NA	NA	NA	NA	NA	NA	T	T	T	T	T	T	T	T	T	T
S2_119373076	A/C	2	119373076	+	NA	NA	NA	NA	NA	NA	A	A	A	A	A	A	A	A	A	A
S2_119373088	G/A	2	119373088	+	NA	NA	NA	NA	NA	NA	G	G	G	G	G	G	G	G	G	G
S2_119474963	C/T	2	119474963	+	NA	NA	NA	NA	NA	NA	C	C	C	C	C	C	C	C	C	C
S2_119558650	T/A	2	119558650	+	NA	NA	NA	NA	NA	NA	T	T	T	T	T	T	T	T	T	T
S2_119558661	G/A	2	119558661	+	NA	NA	NA	NA	NA	NA	G	G	G	G	G	G	G	G	G	G
S2_119870346	C/T	2	119870346	+	NA	NA	NA	NA	NA	NA	C	N	C	C	C	C	C	C	C	C
S2_119870367	A/C	2	119870367	+	NA	NA	NA	NA	NA	NA	A	N	A	A	A	A	A	A	A	A
S2_119870379	C/T	2	119870379	+	NA	NA	NA	NA	NA	NA	C	N	C	C	Y	C	C	C	C	C
S2_120094286	C/T	2	120094286	+	NA	NA	NA	NA	NA	NA	T	C	C	C	C	C	C	C	C	C
S2_120094295	G/T	2	120094295	+	NA	NA	NA	NA	NA	NA	G	G	G	G	G	G	G	G	G	G
S2_120094300	C/A	2	120094300	+	NA	NA	NA	NA	NA	NA	A	C	C	C	C	C	C	C	C	C
S2_120094322	T/C	2	120094322	+	NA	NA	NA	NA	NA	NA	T	T	T	T	T	T	T	T	T	T
S2_120097061	G/C	2	120097061	+	NA	NA	NA	NA	NA	NA	G	G	G	G	G	G	G	G	G	G
S2_120097088	C/A	2	120097088	+	NA	NA	NA	NA	NA	NA	C	C	C	C	C	C	C	C	C	C
S2_120097089	T/A	2	120097089	+	NA	NA	NA	NA	NA	NA	T	T	T	T	T	T	T	T	T	T
S2_120206226	A/T	2	120206226	+	NA	NA	NA	NA	NA	NA	A	A	N	A	A	A	A	N	A	A
S2_120400139	G/C	2	120400139	+	NA	NA	NA	NA	NA	NA	G	N	N	S	G	N	N	G	G	G
S2_120400141	A/T	2	120400141	+	NA	NA	NA	NA	NA	NA	A	N	N	A	A	N	N	A	A	A
S2_120400147	G/A	2	120400147	+	NA	NA	NA	NA	NA	NA	G	N	N	R	A	N	N	G	G	G
S2_120400151	G/C	2	120400151	+	NA	NA	NA	NA	NA	NA	G	N	N	G	G	N	N	G	G	G
S2_120400182	A/T	2	120400182	+	NA	NA	NA	NA	NA	NA	A	N	N	A	A	N	N	A	W	A
S2_120400240	A/G	2	120400240	+	NA	NA	NA	NA	NA	NA	A	A	A	A	A	A	A	A	A	A
S2_120400262	G/A	2	120400262	+	NA	NA	NA	NA	NA	NA	G	G	G	G	G	G	G	R	G	G
S2_120400268	A/G	2	120400268	+	NA	NA	NA	NA	NA	NA	A	A	A	A	A	A	A	R	A	A
S2_120400272	T/C	2	120400272	+	NA	NA	NA	NA	NA	NA	Y	C	C	C	C	Y	Y	Y	Y	Y
S2_120400274	G/A	2	120400274	+	NA	NA	NA	NA	NA	NA	G	G	G	G	G	R	G	G	G	G
S2_120824473	T/C	2	120824473	+	NA	NA	NA	NA	NA	NA	T	N	N	T	T	T	T	N	T	T
S2_121296959	C/T	2	121296959	+	NA	NA	NA	NA	NA	NA	C	C	C	C	C	C	C	C	C	C
S2_121414830	A/G	2	121414830	+	NA	NA	NA	NA	NA	NA	A	A	A	A	A	A	A	A	A	A
S2_121899704	T/C	2	121899704	+	NA	NA	NA	NA	NA	NA	T	N	N	T	T	T	T	N	T	T
S2_122010241	T/C	2	122010241	+	NA	NA	NA	NA	NA	NA	T	N	N	T	T	T	T	N	T	T
S2_122131460	A/G	2	122131460	+	NA	NA	NA	NA	NA	NA	A	N	N	A	A	N	N	N	A	A
S2_122281091	T/C	2	122281091	+	NA	NA	NA	NA	NA	NA	T	T	T	T	T	T	T	T	T	T
S2_122281092	C/A	2	122281092	+	NA	NA	NA	NA	NA	NA	C	C	C	C	C	C	C	C	C	C
S2_123695454	T/C	2	123695454	+	NA	NA	NA	NA	NA	NA	T	T	T	T	T	T	T	T	T	T
S2_124228584	T/C	2	124228584	+	NA	NA	NA	NA	NA	NA	T	Y	T	T	T	T	T	T	T	T
S2_125737451	C/T	2	125737451	+	NA	NA	NA	NA	NA	NA	C	T	T	N	C	N	C	T	C	C
S2_125737466	G/A	2	125737466	+	NA	NA	NA	NA	NA	NA	G	A	A	N	G	N	G	A	G	G
S2_126687614	C/G	2	126687614	+	NA	NA	NA	NA	NA	NA	C	C	C	C	C	C	C	C	C	C
S2_126826740	A/G	2	126826740	+	NA	NA	NA	NA	NA	NA	A	A	A	A	A	A	A	A	A	A
S2_126826743	A/G	2	126826743	+	NA	NA	NA	NA	NA	NA	G	G	G	G	G	G	G	G	G	G
S2_126826817	A/G	2	126826817	+	NA	NA	NA	NA	NA	NA	A	A	A	A	A	A	A	A	A	A
S2_127110937	G/A	2	127110937	+	NA	NA	NA	NA	NA	NA	A	G	G	A	A	R	A	G	A	A
S2_129815477	A/C	2	129815477	+	NA	NA	NA	NA	NA	NA	A	A	A	A	A	A	N	A	A	A
S2_131007644	A/G	2	131007644	+	NA	NA	NA	NA	NA	NA	A	N	A	A	A	A	A	A	A	A
S2_131432994	G/A	2	131432994	+	NA	NA	NA	NA	NA	NA	R	G	G	N	R	G	G	N	G	N
S2_131433005	C/T	2	131433005	+	NA	NA	NA	NA	NA	NA	Y	C	C	N	Y	Y	T	N	T	N
S2_131433020	G/A	2	131433020	+	NA	NA	NA	NA	NA	NA	G	G	G	N	G	G	G	N	G	N
S2_131713025	C/T	2	131713025	+	NA	NA	NA	NA	NA	NA	Y	Y	Y	Y	Y	Y	Y	Y	Y	Y
S2_132421073	T/C	2	132421073	+	NA	NA	NA	NA	NA	NA	T	T	T	T	T	T	T	T	T	T
S2_132518359	T/C	2	132518359	+	NA	NA	NA	NA	NA	NA	T	T	T	T	T	T	T	T	T	T
S2_133482985	T/G	2	133482985	+	NA	NA	NA	NA	NA	NA	N	K	N	T	T	T	T	T	T	T
S2_133482986	G/A	2	133482986	+	NA	NA	NA	NA	NA	NA	R	R	N	R	R	R	R	G	R	R
S2_133482992	T/G	2	133482992	+	NA	NA	NA	NA	NA	NA	K	K	N	K	K	K	K	K	K	K
S2_133482995	A/G	2	133482995	+	NA	NA	NA	NA	NA	NA	A	A	N	A	A	A	A	N	A	A
S2_133482996	C/G	2	133482996	+	NA	NA	NA	NA	NA	NA	C	C	N	S	C	S	S	S	S	S
S2_133483008	C/A	2	133483008	+	NA	NA	NA	NA	NA	NA	C	C	N	C	C	C	C	C	C	C
S2_134382418	T/C	2	134382418	+	NA	NA	NA	NA	NA	NA	T	T	T	T	T	T	T	T	T	T
S2_134485791	C/T	2	134485791	+	NA	NA	NA	NA	NA	NA	C	C	C	C	C	C	C	C	C	N
S2_134485827	G/T	2	134485827	+	NA	NA	NA	NA	NA	NA	K	K	G	K	K	K	K	K	T	N
S2_134485870	C/A	2	134485870	+	NA	NA	NA	NA	NA	NA	M	M	C	M	M	M	M	M	A	N
S2_136498736	A/G	2	136498736	+	NA	NA	NA	NA	NA	NA	A	A	A	A	A	A	A	A	A	A
S2_136521813	A/G	2	136521813	+	NA	NA	NA	NA	NA	NA	A	A	A	A	A	A	A	A	R	A
S2_137175949	A/G	2	137175949	+	NA	NA	NA	NA	NA	NA	A	A	N	A	A	A	A	A	A	A
S2_137639516	G/C	2	137639516	+	NA	NA	NA	NA	NA	NA	G	G	G	G	G	G	G	N	G	G
S2_138328926	G/A	2	138328926	+	NA	NA	NA	NA	NA	NA	G	G	N	N	G	G	G	G	G	G
S2_138328938	G/A	2	138328938	+	NA	NA	NA	NA	NA	NA	G	G	N	N	G	G	G	G	G	G
S2_138328942	A/G	2	138328942	+	NA	NA	NA	NA	NA	NA	A	A	N	N	A	A	A	A	A	A
S2_138328954	C/T	2	138328954	+	NA	NA	NA	NA	NA	NA	C	C	N	N	C	C	C	C	C	C
S2_138445596	A/C	2	138445596	+	NA	NA	NA	NA	NA	NA	A	N	N	A	A	A	A	N	A	A
S2_138571522	A/G	2	138571522	+	NA	NA	NA	NA	NA	NA	A	A	A	N	A	A	A	N	A	A
S2_138571599	T/C	2	138571599	+	NA	NA	NA	NA	NA	NA	T	T	N	T	T	T	T	T	T	T
S2_138571610	G/A	2	138571610	+	NA	NA	NA	NA	NA	NA	G	G	G	G	G	G	G	G	G	G
S2_138571625	G/A	2	138571625	+	NA	NA	NA	NA	NA	NA	G	G	G	G	G	G	G	G	G	G
S2_138571651	G/A	2	138571651	+	NA	NA	NA	NA	NA	NA	A	G	G	A	A	A	A	G	A	A
S2_138765127	G/A	2	138765127	+	NA	NA	NA	NA	NA	NA	G	R	R	R	R	R	R	R	R	G
S2_138875549	C/T	2	138875549	+	NA	NA	NA	NA	NA	NA	C	N	C	C	C	C	N	C	C	C
S2_138875574	T/A	2	138875574	+	NA	NA	NA	NA	NA	NA	T	N	T	T	T	T	N	T	T	T
S2_138875598	A/C	2	138875598	+	NA	NA	NA	NA	NA	NA	M	M	M	M	M	M	M	M	M	M
S2_138875602	C/T	2	138875602	+	NA	NA	NA	NA	NA	NA	Y	Y	Y	Y	Y	Y	Y	Y	Y	Y
S2_138875616	A/C	2	138875616	+	NA	NA	NA	NA	NA	NA	A	A	A	A	A	A	A	A	A	A
S2_138875642	A/C	2	138875642	+	NA	NA	NA	NA	NA	NA	M	M	M	M	M	M	M	M	M	M
S2_138988091	T/C	2	138988091	+	NA	NA	NA	NA	NA	NA	Y	Y	Y	C	Y	C	C	C	C	Y
S2_138988098	C/T	2	138988098	+	NA	NA	NA	NA	NA	NA	C	Y	Y	C	Y	C	C	C	C	Y
S2_139161840	G/T	2	139161840	+	NA	NA	NA	NA	NA	NA	K	G	G	K	K	G	K	N	K	K
S2_139161895	T/C	2	139161895	+	NA	NA	NA	NA	NA	NA	T	T	T	T	T	T	Y	N	Y	T
S2_139401300	C/A	2	139401300	+	NA	NA	NA	NA	NA	NA	C	A	A	C	C	M	C	A	C	C
S2_139401303	A/T	2	139401303	+	NA	NA	NA	NA	NA	NA	A	T	T	A	A	W	A	T	A	A
S2_139401316	G/T	2	139401316	+	NA	NA	NA	NA	NA	NA	G	G	G	K	G	K	K	G	K	G
S2_139401327	G/A	2	139401327	+	NA	NA	NA	NA	NA	NA	G	N	N	R	G	N	R	N	R	G
S2_139401332	C/T	2	139401332	+	NA	NA	NA	NA	NA	NA	C	C	C	Y	C	Y	Y	C	Y	C
S2_139401346	T/A	2	139401346	+	NA	NA	NA	NA	NA	NA	T	T	T	W	T	W	W	T	W	T
S2_139533879	T/C	2	139533879	+	NA	NA	NA	NA	NA	NA	T	Y	T	Y	N	Y	C	T	Y	Y
S2_139533880	T/C	2	139533880	+	NA	NA	NA	NA	NA	NA	T	Y	T	Y	N	Y	C	T	Y	Y
S2_139698673	A/G	2	139698673	+	NA	NA	NA	NA	NA	NA	A	N	A	A	A	A	A	A	A	A
S2_139698680	T/C	2	139698680	+	NA	NA	NA	NA	NA	NA	T	T	T	T	T	T	T	T	T	T
S2_139698709	T/A	2	139698709	+	NA	NA	NA	NA	NA	NA	T	T	T	T	T	T	T	T	T	T
S2_140179508	C/T	2	140179508	+	NA	NA	NA	NA	NA	NA	C	C	C	C	C	C	C	C	C	C
S2_140179533	C/T	2	140179533	+	NA	NA	NA	NA	NA	NA	C	C	Y	Y	C	Y	C	C	C	C
S2_140401274	C/T	2	140401274	+	NA	NA	NA	NA	NA	NA	C	C	C	C	C	C	C	C	C	C
S2_143552551	G/A	2	143552551	+	NA	NA	NA	NA	NA	NA	G	G	N	G	G	G	G	G	G	G
S2_143552563	T/C	2	143552563	+	NA	NA	NA	NA	NA	NA	T	T	N	T	T	T	T	T	T	T
S2_143552586	C/T	2	143552586	+	NA	NA	NA	NA	NA	NA	C	C	N	C	C	C	C	C	C	C
S2_143685598	C/T	2	143685598	+	NA	NA	NA	NA	NA	NA	C	C	C	C	C	C	C	N	C	C
S2_144377516	A/T	2	144377516	+	NA	NA	NA	NA	NA	NA	A	A	A	A	A	A	A	A	A	A
S2_144377534	T/C	2	144377534	+	NA	NA	NA	NA	NA	NA	T	T	T	T	T	T	T	T	T	T
S2_145251900	G/T	2	145251900	+	NA	NA	NA	NA	NA	NA	T	G	G	T	T	K	T	G	T	T
S2_145389997	A/G	2	145389997	+	NA	NA	NA	NA	NA	NA	A	A	A	A	A	A	A	A	A	A
S2_145905865	T/C	2	145905865	+	NA	NA	NA	NA	NA	NA	T	T	T	T	T	T	N	N	N	T
S2_146225522	C/T	2	146225522	+	NA	NA	NA	NA	NA	NA	C	Y	Y	C	Y	Y	C	Y	Y	C
S2_146225524	A/T	2	146225524	+	NA	NA	NA	NA	NA	NA	A	W	W	A	W	W	A	W	W	A
S2_146225525	A/G	2	146225525	+	NA	NA	NA	NA	NA	NA	A	R	R	A	R	R	A	R	R	A
S2_146225526	T/C	2	146225526	+	NA	NA	NA	NA	NA	NA	T	Y	Y	T	Y	Y	T	Y	Y	T
S2_146270752	T/G	2	146270752	+	NA	NA	NA	NA	NA	NA	N	T	N	N	T	N	T	T	N	N
S2_146388832	G/T	2	146388832	+	NA	NA	NA	NA	NA	NA	K	K	K	K	K	K	K	K	K	K
S2_146388833	T/C	2	146388833	+	NA	NA	NA	NA	NA	NA	T	T	T	T	T	T	T	T	T	T
S2_146485683	A/G	2	146485683	+	NA	NA	NA	NA	NA	NA	A	A	A	A	A	A	A	A	A	A
S2_147201332	A/T	2	147201332	+	NA	NA	NA	NA	NA	NA	A	A	A	A	A	A	A	A	A	A
S2_147957145	T/C	2	147957145	+	NA	NA	NA	NA	NA	NA	T	T	T	T	T	T	T	T	T	T
S2_148722217	A/T	2	148722217	+	NA	NA	NA	NA	NA	NA	A	A	A	A	A	A	A	N	A	A
S2_148833922	T/C	2	148833922	+	NA	NA	NA	NA	NA	NA	C	Y	Y	C	C	Y	C	T	C	C
S2_148833950	C/T	2	148833950	+	NA	NA	NA	NA	NA	NA	C	C	C	C	C	C	C	C	C	C
S2_148833961	G/C	2	148833961	+	NA	NA	NA	NA	NA	NA	G	G	G	G	G	G	G	G	G	G
S2_149315676	G/A	2	149315676	+	NA	NA	NA	NA	NA	NA	R	R	R	A	R	R	G	G	R	R
S2_149315720	A/G	2	149315720	+	NA	NA	NA	NA	NA	NA	R	R	R	G	R	R	A	A	R	R
S2_149315729	G/C	2	149315729	+	NA	NA	NA	NA	NA	NA	S	S	S	C	S	S	G	G	S	S
S2_149383429	C/T	2	149383429	+	NA	NA	NA	NA	NA	NA	C	C	C	C	C	C	C	C	C	C
S2_149383434	A/C	2	149383434	+	NA	NA	NA	NA	NA	NA	A	A	A	A	A	A	A	A	A	A
S2_149383445	G/A	2	149383445	+	NA	NA	NA	NA	NA	NA	G	G	G	G	G	G	G	G	G	G
S2_149383457	G/A	2	149383457	+	NA	NA	NA	NA	NA	NA	G	G	G	G	G	G	G	G	G	G
S2_149383467	C/G	2	149383467	+	NA	NA	NA	NA	NA	NA	C	C	C	C	C	C	C	C	C	C
S2_149383493	G/A	2	149383493	+	NA	NA	NA	NA	NA	NA	R	A	A	A	A	A	A	A	A	A
S2_149383502	C/T	2	149383502	+	NA	NA	NA	NA	NA	NA	C	C	C	C	C	C	C	C	C	C
S2_149383504	G/A	2	149383504	+	NA	NA	NA	NA	NA	NA	R	G	G	G	G	G	G	G	G	G
S2_149383511	G/A	2	149383511	+	NA	NA	NA	NA	NA	NA	R	G	G	G	G	G	G	G	G	G
S2_149383516	T/C	2	149383516	+	NA	NA	NA	NA	NA	NA	Y	T	T	T	T	T	T	T	T	T
S2_150735749	A/C	2	150735749	+	NA	NA	NA	NA	NA	NA	M	M	M	M	M	M	M	M	M	M
S2_150735750	C/T	2	150735750	+	NA	NA	NA	NA	NA	NA	Y	Y	Y	Y	Y	Y	Y	Y	Y	Y
S2_151773347	T/C	2	151773347	+	NA	NA	NA	NA	NA	NA	C	N	N	N	N	N	N	N	N	N
S2_151773349	G/A	2	151773349	+	NA	NA	NA	NA	NA	NA	G	N	N	N	N	N	N	N	N	N
S2_151773361	T/C	2	151773361	+	NA	NA	NA	NA	NA	NA	C	N	N	N	N	N	N	N	N	N
S2_151773393	T/C	2	151773393	+	NA	NA	NA	NA	NA	NA	C	N	N	N	N	N	N	N	N	N
S2_152223578	A/C	2	152223578	+	NA	NA	NA	NA	NA	NA	A	A	A	A	A	A	A	N	A	M
S2_152223589	T/G	2	152223589	+	NA	NA	NA	NA	NA	NA	T	G	K	T	K	K	T	N	T	K
S2_152223590	C/G	2	152223590	+	NA	NA	NA	NA	NA	NA	C	C	C	C	C	C	C	N	C	S
S2_152223592	T/G	2	152223592	+	NA	NA	NA	NA	NA	NA	T	T	T	T	T	K	T	N	T	K
S2_152223593	A/G	2	152223593	+	NA	NA	NA	NA	NA	NA	A	A	R	A	A	A	A	N	A	R
S2_152223595	T/A	2	152223595	+	NA	NA	NA	NA	NA	NA	T	T	T	W	T	W	T	N	T	T
S2_153600347	T/G	2	153600347	+	NA	NA	NA	NA	NA	NA	T	T	T	T	T	T	T	T	T	T
S2_153600474	T/C	2	153600474	+	NA	NA	NA	NA	NA	NA	T	T	T	Y	T	T	Y	T	T	T
S2_153921000	C/T	2	153921000	+	NA	NA	NA	NA	NA	NA	Y	C	Y	Y	Y	Y	Y	Y	Y	Y
S2_153921027	C/T	2	153921027	+	NA	NA	NA	NA	NA	NA	Y	Y	Y	Y	Y	Y	Y	Y	Y	Y
S2_155018890	T/C	2	155018890	+	NA	NA	NA	NA	NA	NA	T	N	T	T	T	T	T	N	T	T
S2_155018897	A/C	2	155018897	+	NA	NA	NA	NA	NA	NA	A	N	A	A	A	A	A	N	A	A
S2_155876079	A/G	2	155876079	+	NA	NA	NA	NA	NA	NA	N	A	A	A	A	A	A	A	A	A
S2_155876509	A/G	2	155876509	+	NA	NA	NA	NA	NA	NA	A	N	A	A	A	R	A	N	A	A
S2_155876523	T/C	2	155876523	+	NA	NA	NA	NA	NA	NA	T	N	T	T	T	T	T	N	T	T
S2_157085057	G/A	2	157085057	+	NA	NA	NA	NA	NA	NA	R	G	R	R	G	R	R	G	R	G
S2_157085079	T/C	2	157085079	+	NA	NA	NA	NA	NA	NA	Y	T	Y	Y	T	Y	Y	T	Y	T
S2_157085080	G/A	2	157085080	+	NA	NA	NA	NA	NA	NA	R	G	R	R	G	R	R	G	R	G
S2_157085092	A/G	2	157085092	+	NA	NA	NA	NA	NA	NA	R	A	R	R	A	R	R	A	R	A
S2_157295559	T/G	2	157295559	+	NA	NA	NA	NA	NA	NA	T	T	T	T	T	T	T	T	T	T
S2_157716205	A/G	2	157716205	+	NA	NA	NA	NA	NA	NA	N	A	A	N	A	N	A	A	N	A
S2_158302534	T/C	2	158302534	+	NA	NA	NA	NA	NA	NA	N	T	N	C	Y	Y	Y	N	Y	N
S2_159218157	C/T	2	159218157	+	NA	NA	NA	NA	NA	NA	C	C	C	C	C	C	C	C	C	C
S2_159218163	G/A	2	159218163	+	NA	NA	NA	NA	NA	NA	G	G	G	G	G	G	G	G	G	G
S2_159218168	T/C	2	159218168	+	NA	NA	NA	NA	NA	NA	T	T	Y	T	T	T	T	T	T	T
S2_159218179	C/T	2	159218179	+	NA	NA	NA	NA	NA	NA	C	C	C	C	C	C	C	C	C	C
S2_159218182	T/C	2	159218182	+	NA	NA	NA	NA	NA	NA	T	T	T	T	T	T	T	T	T	T
S2_159218184	C/T	2	159218184	+	NA	NA	NA	NA	NA	NA	C	C	C	C	C	C	C	C	C	C
S2_159218185	C/T	2	159218185	+	NA	NA	NA	NA	NA	NA	C	C	C	C	C	C	Y	Y	C	C
S2_159218194	C/T	2	159218194	+	NA	NA	NA	NA	NA	NA	C	C	C	C	C	C	Y	C	C	C
S2_159218204	C/A	2	159218204	+	NA	NA	NA	NA	NA	NA	C	C	C	C	C	C	C	C	C	C
S2_159218211	A/G	2	159218211	+	NA	NA	NA	NA	NA	NA	A	A	A	A	A	A	A	A	A	A
S2_159621179	G/T	2	159621179	+	NA	NA	NA	NA	NA	NA	K	K	K	G	G	K	K	K	K	N
S2_159813633	C/T	2	159813633	+	NA	NA	NA	NA	NA	NA	C	C	C	C	C	C	C	C	C	C
S2_159813642	A/G	2	159813642	+	NA	NA	NA	NA	NA	NA	A	A	A	A	A	A	A	A	A	A
S2_159813671	G/T	2	159813671	+	NA	NA	NA	NA	NA	NA	G	G	G	G	G	G	G	G	G	G
S2_159943742	A/G	2	159943742	+	NA	NA	NA	NA	NA	NA	A	A	A	A	A	A	N	N	N	A
S2_160471387	A/C	2	160471387	+	NA	NA	NA	NA	NA	NA	A	N	A	N	A	A	A	A	A	A
S2_160811208	T/C	2	160811208	+	NA	NA	NA	NA	NA	NA	T	T	T	T	T	T	T	N	T	T
S2_161745920	A/G	2	161745920	+	NA	NA	NA	NA	NA	NA	A	A	A	A	A	A	A	A	A	A
S2_161790196	C/T	2	161790196	+	NA	NA	NA	NA	NA	NA	C	C	C	N	C	C	C	C	C	C
S2_161790256	T/G	2	161790256	+	NA	NA	NA	NA	NA	NA	T	T	T	T	T	K	K	K	K	K
S2_162376765	G/A	2	162376765	+	NA	NA	NA	NA	NA	NA	R	G	G	R	R	R	R	G	R	R
S2_162376766	T/C	2	162376766	+	NA	NA	NA	NA	NA	NA	Y	T	T	Y	Y	Y	Y	T	Y	Y
S2_162376791	T/A	2	162376791	+	NA	NA	NA	NA	NA	NA	T	W	W	T	T	W	T	A	T	T
S2_162376794	T/C	2	162376794	+	NA	NA	NA	NA	NA	NA	T	Y	Y	T	T	Y	T	T	T	T
S2_162376802	C/G	2	162376802	+	NA	NA	NA	NA	NA	NA	S	C	C	S	S	C	S	C	S	S
S2_162376808	T/C	2	162376808	+	NA	NA	NA	NA	NA	NA	Y	Y	Y	Y	Y	Y	Y	C	Y	Y
S2_162625382	A/G	2	162625382	+	NA	NA	NA	NA	NA	NA	A	R	A	A	A	A	R	A	A	R
S2_162625401	A/C	2	162625401	+	NA	NA	NA	NA	NA	NA	A	M	A	A	A	A	M	A	A	M
S2_162866706	A/T	2	162866706	+	NA	NA	NA	NA	NA	NA	A	A	A	W	A	A	A	A	A	A
S2_163306577	T/C	2	163306577	+	NA	NA	NA	NA	NA	NA	C	T	T	C	Y	C	T	T	C	T
S2_164154863	T/C	2	164154863	+	NA	NA	NA	NA	NA	NA	Y	Y	Y	Y	Y	Y	Y	Y	Y	C
S2_164154869	T/A	2	164154869	+	NA	NA	NA	NA	NA	NA	W	W	W	W	W	W	W	W	W	A
S2_165094978	T/G	2	165094978	+	NA	NA	NA	NA	NA	NA	G	T	N	G	K	G	T	N	G	T
S2_165095054	G/C	2	165095054	+	NA	NA	NA	NA	NA	NA	G	G	G	G	G	G	G	G	G	G
S2_165095060	C/A	2	165095060	+	NA	NA	NA	NA	NA	NA	C	C	C	C	C	C	C	C	C	C
S2_165179728	C/T	2	165179728	+	NA	NA	NA	NA	NA	NA	T	C	C	T	Y	T	C	C	T	C
S2_165571013	C/T	2	165571013	+	NA	NA	NA	NA	NA	NA	T	C	C	T	Y	T	C	C	T	C
S2_165801168	T/C	2	165801168	+	NA	NA	NA	NA	NA	NA	T	T	T	T	Y	T	T	T	T	T
S2_165801175	T/C	2	165801175	+	NA	NA	NA	NA	NA	NA	T	T	T	T	T	T	T	T	T	T
S2_165801178	C/G	2	165801178	+	NA	NA	NA	NA	NA	NA	C	C	C	C	C	C	C	C	C	C
S2_166372331	C/T	2	166372331	+	NA	NA	NA	NA	NA	NA	Y	C	C	Y	C	C	Y	C	C	C
S2_166372357	A/G	2	166372357	+	NA	NA	NA	NA	NA	NA	A	R	A	A	R	A	A	R	R	R
S2_166372382	C/G	2	166372382	+	NA	NA	NA	NA	NA	NA	S	C	C	C	C	C	C	C	C	C
S2_166722897	C/A	2	166722897	+	NA	NA	NA	NA	NA	NA	M	C	C	C	C	C	N	C	C	C
S2_166722926	C/T	2	166722926	+	NA	NA	NA	NA	NA	NA	Y	C	C	C	C	C	N	C	C	C
S2_166967583	T/C	2	166967583	+	NA	NA	NA	NA	NA	NA	T	T	N	T	T	T	T	N	T	T
S2_167053242	T/C	2	167053242	+	NA	NA	NA	NA	NA	NA	T	T	T	T	T	T	T	T	T	T
S2_167053243	C/T	2	167053243	+	NA	NA	NA	NA	NA	NA	Y	C	C	C	C	C	C	C	C	C
[truncated: 20,063 more rows]
