# Supplementary material for: Introgression and monitoring of wild Helianthus praecox alien segments associated with Sclerotinia basal stalk rot resistance in sunflower using genotyping-by-sequencing
Source: PLoS One. 2019 Mar 1;14(3):e0213065. doi: 10.1371/journal.pone.0213065 (PMC6396933; doi:10.1371/journal.pone.0213065)
Supplement: S2 Table — (XLSX) [file pone.0213065.s003.xlsx]

## Sheet: Sheet1
S2 Table Summary of the Sclerotinia basal stalk rot tests of the BC2F3 families in inoculated field nurseries at
Carrington and Crookston in 2012, and Crookston in 2013
Line/Plant ID	Pedigree	No. of plant scored	Disease incidence (%)ⱡ
Cargill 270 (S-check)		68	47.4
HA 89 (recurrent parent)		56	33
HA 441 (R-check)		68	31.9
Croplan 305 (R-check)		57	19.9
11-291-05	HA89/HA458/(NMS HA89 × H. praecox subsp. runyonii PI 468853)	57	0
11-292-33	HA89/HA458/(NMS HA89 × H. praecox subsp. runyonii PI 468853)	57	0
11-291-57	HA89/HA458/(NMS HA89 × H. praeco×subsp. runyonii PI 468853)	53	1.5
11-291-17	HA89/HA458/(NMS HA89 × H. praeco×subsp. runyonii PI 468853)	45	1.7
11-295-17	HA89/HA458/(NMS HA89 × H. praeco×subsp. runyonii PI 468853)	44	1.8
11-291-67	HA89/HA458/(NMS HA89 × H. praeco×subsp. runyonii PI 468853)	47	2.3
11-291-33	HA89/HA458/(NMS HA89 × H. praeco×subsp. runyonii PI 468853)	50	2.5
11-294-21	HA89/HA458/(NMS HA89 × H. praeco×subsp. runyonii PI 468853)	57	3.1
11-295-01	HA89/HA458/(NMS HA89 × H. praeco×subsp. runyonii PI 468853)	57	3.3
11-291-65	HA89/HA458/(NMS HA89 × H. praeco×subsp. runyonii PI 468853)	67	4.2
11-291-09	HA89/HA458/(NMS HA89 × H. praeco×subsp. runyonii PI 468853)	71	4.5
11-291-45	HA89/HA458/(NMS HA89 × H. praeco×subsp. runyonii PI 468853)	62	5.3
11-291-49	HA89/HA458/(NMS HA89 × H. praeco×subsp. runyonii PI 468853)	59	6.3
11-292-25	HA89/HA458/(NMS HA89 × H. praeco×subsp. runyonii PI 468853)	68	6.3
11-291-01	HA89/HA458/(NMS HA89 × H. praeco×subsp. runyonii PI 468853)	56	6.6
11-291-64	HA89/HA458/(NMS HA89 × H. praeco×subsp. runyonii PI 468853)	72	7.8
11-291-37	HA89/HA458/(NMS HA89 × H. praeco×subsp. runyonii PI 468853)	61	8.9
11-294-17	HA89/HA458/(NMS HA89 × H. praeco×subsp. runyonii PI 468853)	54	8.9
11-292-53	HA89/HA458/(NMS HA89 × H. praeco×subsp. runyonii PI 468853)	55	9.3
11-298-05	HA89/HA458/(NMS HA89 × H. praeco×subsp. runyonii PI 468853)	67	9.8
11-291-23	HA89/HA458/(NMS HA89 × H. praeco×subsp. runyonii PI 468853)	41	10.1
11-292-09	HA89/HA458/(NMS HA89 × H. praeco×subsp. runyonii PI 468853)	53	10.2
11-291-54	HA89/HA458/(NMS HA89 × H. praeco×subsp. runyonii PI 468853)	62	10.4
11-295-45	HA89/HA458/(NMS HA89 × H. praeco×subsp. runyonii PI 468853)	50	11.4
11-291-41	HA89/HA458/(NMS HA89 × H. praeco×subsp. runyonii PI 468853)	65	11.4
11-291-68	HA89/HA458/(NMS HA89 × H. praeco×subsp. runyonii PI 468853)	52	11.5
11-295-25	HA89/HA458/(NMS HA89 × H. praeco×subsp. runyonii PI 468853)	33	11.7
11-291-29	HA89/HA458/(NMS HA89 × H. praeco×subsp. runyonii PI 468853)	58	11.8
11-292-57	HA89/HA458/(NMS HA89 × H. praeco×subsp. runyonii PI 468853)	64	14.2
11-298-21	HA89/HA458/(NMS HA89 × H. praeco×subsp. runyonii PI 468853)	61	15.7
11-293-41	HA89/HA458/(NMS HA89 × H. praeco×subsp. runyonii PI 468853)	57	19.8
11-297-45	HA89/HA458/(NMS HA89 × H. praeco×subsp. runyonii PI 468853)	64	20
11-291-53	HA89/HA458/(NMS HA89 × H. praeco×subsp. runyonii PI 468853)	56	21.2
11-292-05	HA89/HA458/(NMS HA89 × H. praeco×subsp. runyonii PI 468853)	63	21.4
11-297-09	HA89/HA458/(NMS HA89 × H. praeco×subsp. runyonii PI 468853)	61	21.6
11-294-05	HA89/HA458/(NMS HA89 × H. praeco×subsp. runyonii PI 468853)	53	21.7
11-291-69	HA89/HA458/(NMS HA89 × H. praeco×subsp. runyonii PI 468853)	63	21.9
11-292-62	HA89/HA458/(NMS HA89 × H. praeco×subsp. runyonii PI 468853)	70	23.8
11-298-09	HA89/HA458/(NMS HA89 × H. praeco×subsp. runyonii PI 468853)	63	28
11-297-37	HA89/HA458/(NMS HA89 × H. praeco×subsp. runyonii PI 468853)	47	30.1
12-20-01	HA89/HA458/(NMS HA89 × H. praeco×subsp. runyonii PI 468853)	16*	31
12-17-01	HA89/HA458/(NMS HA89 × H. praeco×subsp. runyonii PI 468853)	35*	33.5
12-18-17	HA89/HA458/(NMS HA89 × H. praeco×subsp. runyonii PI 468853)	28*	39.2
11-294-10	HA89/HA458/(NMS HA89 × H. praeco×subsp. runyonii PI 468853)	64	40.4
12-18-41	HA89/HA458/(NMS HA89 × H. praeco×subsp. runyonii PI 468853)	31*	52.2
ⱡ disease incidence for HA 89 and three checks are the mean of two years data
*tested in 2013
