# Supplementary material for: Introgression and monitoring of wild Helianthus praecox alien segments associated with Sclerotinia basal stalk rot resistance in sunflower using genotyping-by-sequencing
Source: PLoS One. 2019 Mar 1;14(3):e0213065. doi: 10.1371/journal.pone.0213065 (PMC6396933; doi:10.1371/journal.pone.0213065)
Supplement: S3 Table — (XLSX) [file pone.0213065.s004.xlsx]

## Sheet: Sheet1
S3 Table Summary of the Sclerotinia basal stalk rot tests of the BC2F4 plants in inoculated field
nurseries at Crookston in 2013
Lines/ Plant ID	Pedigree	No. of plant scored	Disease incidence (%)
Cargill 270 (S-check)		77	72.6
HA 89 (recurrent parent)		56	51.6
HA 441 (R-check)		68	28.6
Croplan 305 (R-check)		57	34.9
12-3459-1	HA89/HA458/(NMS HA89 × H. praecox subsp. runyonii PI 468853)	31	0
12-3459-3	HA89/HA458/(NMS HA89 × H. praecox subsp. runyonii PI 468853)	27	0
12-3460-4	HA89/HA458/(NMS HA89 × H. praecox subsp. runyonii PI 468853)	30	0
12-3438-2	HA89/HA458/(NMS HA89 × H. praecox subsp. runyonii PI 468853)	31	3.1
12-3467-1	HA89/HA458/(NMS HA89 × H. praecox subsp. runyonii PI 468853)	32	3.3
12-3482-1	HA89/HA458/(NMS HA89 × H. praecox subsp. runyonii PI 468853)	29	3.3
12-3443-2	HA89/HA458/(NMS HA89 × H. praecox subsp. runyonii PI 468853)	26	3.6
12-3451-4	HA89/HA458/(NMS HA89 × H. praecox subsp. runyonii PI 468853)	24	3.8
12-3443-1	HA89/HA458/(NMS HA89 × H. praecox subsp. runyonii PI 468853)	29	4.2
12-3460-3	HA89/HA458/(NMS HA89 × H. praecox subsp. runyonii PI 468853)	31	6.5
12-3442-1	HA89/HA458/(NMS HA89 × H. praecox subsp. runyonii PI 468853)	33	6.7
12-3447-3	HA89/HA458/(NMS HA89 × H. praecox subsp. runyonii PI 468853)	24	7.1
12-3459-4	HA89/HA458/(NMS HA89 × H. praecox subsp. runyonii PI 468853)	30	7.1
12-3456-1	HA89/HA458/(NMS HA89 × H. praecox subsp. runyonii PI 468853)	24	7.7
12-3467-2	HA89/HA458/(NMS HA89 × H. praecox subsp. runyonii PI 468853)	24	8.3
12-3451-2	HA89/HA458/(NMS HA89 × H. praecox subsp. runyonii PI 468853)	24	10
12-3451-3	HA89/HA458/(NMS HA89 × H. praecox subsp. runyonii PI 468853)	30	10
12-3442-2	HA89/HA458/(NMS HA89 × H. praecox subsp. runyonii PI 468853)	28	10.7
12-3492-4	HA89/HA458/(NMS HA89 × H. praecox sbusp. runyonii PI 468853)	26	11.2
12-3451-1	HA89/HA458/(NMS HA89 × H. praecox subsp. runyonii PI 468853)	26	11.4
12-3493-1	HA89/HA458/(NMS HA89 × H. praecox subsp. runyonii PI 468853)	24	11.5
12-3438-1	HA89/HA458/(NMS HA89 × H. praecox subsp. runyonii PI 468853)	34	11.8
12-3482-3	HA89/HA458/(NMS HA89 × H. praecox subsp. runyonii PI 468853)	25	11.9
12-3482-2	HA89/HA458/(NMS HA89 × H. praecox subsp. runyonii PI 468853)	31	12.5
12-3442-3	HA89/HA458/(NMS HA89 × H. praecox subsp. runyonii PI 468853)	32	12.5
12-3442-4	HA89/HA458/(NMS HA89 × H. praecox subsp. runyonii PI 468853)	22	13.6
12-3493-2	HA89/HA458/(NMS HA89 × H. praecox subsp. runyonii PI 468853)	30	16.5
12-3438-3	HA89/HA458/(NMS HA89 × H. praecox subsp. runyonii PI 468853)	23	17
12-3438-4	HA89/HA458/(NMS HA89 × H. praecox subsp. runyonii PI 468853)	31	17.2
12-3447-4	HA89/HA458/(NMS HA89 × H. praecox subsp. runyonii PI 468853)	35	17.3
12-3440-4	HA89/HA458/(NMS HA89 × H. praecox sbusp. runyonii PI 468853)	23	17.4
12-3460-2	HA89/HA458/(NMS HA89 × H. praecox subsp. runyonii PI 468853)	24	17.8
12-3459-2	HA89/HA458/(NMS HA89 × H. praecox subsp. runyonii PI 468853)	30	19.5
12-3492-3	HA89/HA458/(NMS HA89 × H. praecox subsp. runyonii PI 468853)	27	22
12-3492-2	HA89/HA458/(NMS HA89 × H. praecox subsp. runyonii PI 468853)	29	23.8
12-3440-3	HA89/HA458/(NMS HA89 × H. praecox subsp. runyonii PI 468853)	28	23.8
12-3482-4	HA89/HA458/(NMS HA89 × H. praecox subsp. runyonii PI 468853)	26	25.8
12-3440-2	HA89/HA458/(NMS HA89 × H. praecox subsp. runyonii PI 468853)	27	26.1
12-3443-3	HA89/HA458/(NMS HA89 × H. praecox subsp. runyonii PI 468853)	21	26.4
12-3447-1	HA89/HA458/(NMS HA89 × H. praecox subsp. runyonii PI 468853)	30	26.7
12-3460-1	HA89/HA458/(NMS HA89 × H. praecox subsp. runyonii PI 468853)	34	29.1
12-3447-2	HA89/HA458/(NMS HA89 × H. praecox subsp. runyonii PI 468853)	27	29.7
12-3440-1	HA89/HA458/(NMS HA89 × H. praecox sbusp. runyonii PI 468853)	28	32.1
12-3492-1	HA89/HA458/(NMS HA89 × H. praecox sbusp. runyonii PI 468853)	30	51.4
