# Supplementary material for: Introgression and monitoring of wild Helianthus praecox alien segments associated with Sclerotinia basal stalk rot resistance in sunflower using genotyping-by-sequencing
Source: PLoS One. 2019 Mar 1;14(3):e0213065. doi: 10.1371/journal.pone.0213065 (PMC6396933; doi:10.1371/journal.pone.0213065)
Supplement: S4 Table — (XLSX) [file pone.0213065.s005.xlsx]

## Sheet: Sheet1
S4 Table Unique polymorphic SNPs between recurrent parents and one or more of the H. praecox introgression lines
SNP	alleles	chrom	pos	HA458	HA89	H. praecox	H. petiolaris†	H. argophyllus†
S1_4881505	C/A	1	4881505	C	C	A
S1_4881512	T/C	1	4881512	T	T	C
S1_4881513	G/C	1	4881513	G	G	C
S1_4881525	G/A	1	4881525	G	G	A
S1_6732702	T/G	1	6732702	T	T	G
S1_7772477	C/G	1	7772477	C	C	G
S1_7772494	C/A	1	7772494	C	C	A
S1_13307968	A/G	1	13307968	A	A	G
S1_13307969	C/G	1	13307969	G	G	C
S1_15456481	C/G	1	15456481	C	C	G
S1_15456493	G/A	1	15456493	G	G	A
S1_24667271	T/G	1	24667271	T	T	G
S1_24667274	A/G	1	24667274	A	A	G
S1_27059435	T/C	1	27059435	T	T	C
S1_27059462	T/G	1	27059462	T	T	G
S1_28725140	G/A	1	28725140	G	G	A
S1_28725194	T/A	1	28725194	T	T	A
S1_31246744	T/A	1	31246744	T	T	A
S1_31323403	G/T	1	31323403	G	G	T
S1_31323407	A/G	1	31323407	A	A	G
S1_32306478	T/C	1	32306478	T	T	C
S1_32306490	C/G	1	32306490	C	C	G
S1_32306503	C/T	1	32306503	C	C	T
S1_33496170	A/C	1	33496170	A	A	C
S1_38370085	G/A	1	38370085	G	G	A
S1_38370099	C/T	1	38370099	C	C	T
S1_38370177	C/T	1	38370177	C	C	T
S1_40380569	C/T	1	40380569	C	C	T
S1_43428550	C/T	1	43428550	C	C	T
S1_43428570	T/C	1	43428570	T	T	C
S1_43428575	A/T	1	43428575	A	A	T
S1_43428584	A/G	1	43428584	A	A	G
S1_44702296	A/C	1	44702296	A	A	C
S1_44702311	A/T	1	44702311	A	A	T
S1_46721834	T/C	1	46721834	T	T	C
S1_46721841	T/A	1	46721841	T	T	A
S1_48420100	C/A	1	48420100	C	C	A		A
S1_48420178	A/G	1	48420178	A	A	G
S1_48498539	T/C	1	48498539	C	C	T
S1_59424317	A/T	1	59424317	A	A	T
S1_59424324	A/C	1	59424324	A	A	C
S1_59424466	T/C	1	59424466	T	T	C
S1_59424467	T/A	1	59424467	T	T	A
S1_59424540	G/A	1	59424540	G	G	A
S1_61032510	A/G	1	61032510	A	A	G
S1_62717747	G/A	1	62717747	G	G	A
S1_63389551	T/A	1	63389551	T	T	A
S1_64017106	T/C	1	64017106	T	T	C
S1_64017120	G/A	1	64017120	G	G	A
S1_64995494	T/C	1	64995494	T	T	C
S1_64995526	C/T	1	64995526	C	C	T
S1_64995531	A/G	1	64995531	A	A	G
S1_66877218	T/C	1	66877218	T	T	C
S1_69531288	G/T	1	69531288	G	G	T
S1_69531308	C/T	1	69531308	C	C	T
S1_69531317	C/T	1	69531317	C	C	T
S1_74179559	C/T	1	74179559	C	C	T
S1_77032581	T/C	1	77032581	T	T	C
S1_77032585	C/T	1	77032585	C	C	T
S1_77032647	C/G	1	77032647	C	C	G
S1_88693702	C/T	1	88693702	C	C	T
S1_88693715	T/C	1	88693715	T	T	C
S1_88693750	T/C	1	88693750	T	T	C
S1_92332628	A/T	1	92332628	A	A	T
S1_93809081	C/A	1	93809081	C	C	A
S1_93809124	T/G	1	93809124	T	T	G
S1_93809907	C/A	1	93809907	C	C	A
S1_93809908	A/C	1	93809908	A	A	C
S1_93809923	T/C	1	93809923	T	T	C
S1_93809946	G/A	1	93809946	G	G	A
S1_93876327	G/A	1	93876327	G	G	A
S1_93876366	T/A	1	93876366	T	T	A
S1_93876368	A/G	1	93876368	A	A	G
S1_93876374	G/A	1	93876374	G	G	A
S1_93876400	C/A	1	93876400	C	C	A
S1_93876423	C/T	1	93876423	C	C	T
S1_97641652	G/A	1	97641652	G	G	A
S1_97641674	A/G	1	97641674	A	A	G
S1_97641676	A/G	1	97641676	A	A	G
S1_98127344	G/A	1	98127344	G	G	A
S1_99111212	A/G	1	99111212	A	A	G
S1_99111213	T/C	1	99111213	T	T	C
S1_99111219	T/G	1	99111219	G	G	T
S1_99234180	A/G	1	99234180	G	G	A
S1_99234184	G/T	1	99234184	G	G	T
S1_99234195	T/G	1	99234195	T	T	G
S1_99234200	A/C	1	99234200	A	A	C
S1_99234208	A/G	1	99234208	G	G	A
S1_99234225	A/T	1	99234225	A	A	T
S1_99670093	G/A	1	99670093	G	G	A
S1_99670113	T/A	1	99670113	T	T	A
S1_99823840	T/G	1	99823840	T	T	G
S1_99841464	G/A	1	99841464	G	G	A
S1_99841472	A/G	1	99841472	A	A	G
S1_99841492	T/G	1	99841492	T	T	G
S1_102347353	T/C	1	102347353	T	T	C
S1_102347382	C/T	1	102347382	C	C	T
S1_107449559	G/A	1	107449559	G	G	A
S1_117090843	G/A	1	117090843	G	G	A
S1_117229543	T/G	1	117229543	T	T	G
S1_117450555	A/G	1	117450555	A	A	G
S1_117450575	C/T	1	117450575	C	C	T
S1_117450577	A/G	1	117450577	A	A	G
S1_119723949	A/C	1	119723949	A	A	C
S1_119920325	C/T	1	119920325	C	C	T
S1_119920359	G/A	1	119920359	G	G	A
S1_119920362	T/G	1	119920362	T	T	G
S1_119920375	A/G	1	119920375	A	A	G
S1_120328645	A/C	1	120328645	A	A	C
S1_122194102	G/C	1	122194102	G	G	C
S1_122194114	A/G	1	122194114	A	A	G
S1_122194127	C/T	1	122194127	C	C	T
S1_122194130	A/G	1	122194130	A	A	G
S1_127213966	C/T	1	127213966	C	C	T
S1_129139326	A/T	1	129139326	A	A	T
S1_129139358	T/C	1	129139358	T	T	C
S1_129570774	A/T	1	129570774	A	A	T
S1_141297839	G/A	1	141297839	G	G	A
S1_141297884	G/T	1	141297884	G	G	T
S1_148719353	G/A	1	148719353	G	G	A
S1_150101219	G/A	1	150101219	G	G	A
S1_152253322	C/T	1	152253322	C	C	T
S1_153633316	T/A	1	153633316	T	T	A
S1_154525025	G/C	1	154525025	C	C	G
S1_154525038	T/A	1	154525038	T	T	A
S1_154525047	T/C	1	154525047	C	C	T
S1_154525051	G/T	1	154525051	T	T	G
S1_166531558	A/G	1	166531558	A	A	G
S2_40508201	A/C	2	40508201	A	A	C
S2_40508229	C/T	2	40508229	C	C	T
S2_47876561	C/T	2	47876561	C	C	T
S2_47876590	C/T	2	47876590	C	C	T
S2_54970450	T/C	2	54970450	T	T	C
S2_54970465	G/A	2	54970465	G	G	A
S2_54970468	A/G	2	54970468	A	A	G
S2_100155663	T/A	2	100155663	T	T	A
S2_167631815	C/A	2	167631815	C	C	A
S2_167631834	A/G	2	167631834	A	A	G
S2_172535916	T/A	2	172535916	T	T	A
S2_184827033	A/T	2	184827033	A	A	T
S2_185089657	T/C	2	185089657	T	T	C
S2_185089660	A/G	2	185089660	A	A	G
S2_195114660	T/G	2	195114660	T	T	G
S2_196651472	G/A	2	196651472	G	G	A
S2_206530078	T/C	2	206530078	T	T	C
S2_206530081	A/G	2	206530081	A	A	G
S2_206530091	G/A	2	206530091	G	G	A
S2_206530113	C/T	2	206530113	C	C	T
S2_207151253	T/C	2	207151253	T	T	C
S2_207151308	A/G	2	207151308	A	A	G
S3_3861853	T/C	3	3861853	T	T	C
S3_7892288	C/T	3	7892288	C	C	T
S3_7892302	G/A	3	7892302	G	G	A
S3_49783257	A/C	3	49783257	A	A	C
S3_52742074	T/G	3	52742074	T	T	G
S3_52742079	T/C	3	52742079	T	T	C
S3_81346874	T/C	3	81346874	T	T	C
S3_86037988	A/C	3	86037988	A	A	C
S3_90446043	A/G	3	90446043	A	A	G
S3_133538604	T/A	3	133538604	T	T	A
S3_158836427	T/C	3	158836427	T	T	C
S3_171094638	C/G	3	171094638	C	C	G
S3_171400666	G/T	3	171400666	G	G	T
S3_173023586	C/G	3	173023586	C	C	G
S3_175563591	A/G	3	175563591	A	A	G
S3_175563600	T/C	3	175563600	T	T	C
S3_175563628	T/A	3	175563628	T	T	A
S3_180697987	C/A	3	180697987	A	A	C
S3_180698041	C/T	3	180698041	T	T	C
S3_181191328	T/C	3	181191328	T	T	C
S3_181191341	T/C	3	181191341	T	T	C
S3_181191355	T/C	3	181191355	T	T	C
S3_181191358	G/C	3	181191358	G	G	C
S3_183739945	G/A	3	183739945	A	A	G
S3_189084735	T/A	3	189084735	T	T	A
S3_192931050	A/G	3	192931050	A	A	G
S3_196469624	G/A	3	196469624	G	G	A
S4_4315166	A/G	4	4315166	A	A	G
S4_19113211	G/A	4	19113211	G	G	A
S4_19113248	C/A	4	19113248	C	C	A
S4_29388360	C/T	4	29388360	C	C	T
S4_29388375	A/T	4	29388375	A	A	T
S4_52909845	T/C	4	52909845	C	C	T	T
S4_59192447	C/A	4	59192447	C	C	A
S4_63162797	C/T	4	63162797	C	C	T
S4_90401983	A/C	4	90401983	A	A	C
S4_90402014	A/G	4	90402014	A	A	G
S4_90402018	A/T	4	90402018	A	A	T
S4_90710155	A/G	4	90710155	A	A	G
S4_115835960	G/A	4	115835960	G	G	A
S4_174849772	C/T	4	174849772	C	C	T
S4_199879892	A/G	4	199879892	A	A	G
S5_13691982	A/G	5	13691982	A	A	G	G
S5_13692019	A/C	5	13692019	A	A	C
S5_24768947	T/C	5	24768947	T	T	C
S5_70660154	C/A	5	70660154	C	C	A
S5_107115481	G/A	5	107115481	G	G	A
S5_123479487	A/G	5	123479487	A	A	G
S5_129790780	G/A	5	129790780	G	G	A
S5_130640943	C/G	5	130640943	C	C	G
S5_130641128	A/G	5	130641128	A	A	G
S5_138023892	G/A	5	138023892	G	G	A
S5_147651471	G/C	5	147651471	G	G	C
S5_147651692	T/A	5	147651692	T	T	A		A
S5_171403315	T/A	5	171403315	T	T	A
S5_183852080	T/C	5	183852080	T	T	C
S5_183852095	T/C	5	183852095	T	T	C
S5_183852119	T/C	5	183852119	T	T	C
S5_189499279	G/A	5	189499279	G	G	A
S5_189499313	T/C	5	189499313	T	T	C
S5_189499343	T/G	5	189499343	T	T	G
S5_189499348	A/G	5	189499348	A	A	G
S5_189499352	T/A	5	189499352	A	A	T
S5_189499375	T/A	5	189499375	T	T	A
S5_195410067	C/T	5	195410067	C	C	T
S5_196457107	G/A	5	196457107	G	G	A
S5_196457120	T/A	5	196457120	T	T	A
S5_200688985	G/T	5	200688985	G	G	T
S5_200689003	A/T	5	200689003	A	A	T
S5_200689110	C/T	5	200689110	C	C	T
S5_216285143	C/T	5	216285143	C	C	T
S5_216285144	A/G	5	216285144	A	A	G
S5_220892445	T/C	5	220892445	C	C	T
S5_220892460	C/T	5	220892460	T	T	C
S5_224920978	T/C	5	224920978	T	T	C
S5_224921008	T/C	5	224921008	T	T	C
S5_224921047	T/C	5	224921047	T	T	C
S5_227277796	G/A	5	227277796	G	G	A		A
S5_227277809	A/T	5	227277809	A	A	T		T
S5_227277834	C/A	5	227277834	C	C	A		A
S5_228444897	G/A	5	228444897	G	G	A
S5_232107145	A/G	5	232107145	A	A	G
S5_234456152	G/C	5	234456152	G	G	C
S5_239581320	A/T	5	239581320	A	A	T
S5_242876370	A/G	5	242876370	A	A	G
S5_246618498	T/G	5	246618498	T	T	G
S5_246618525	A/G	5	246618525	A	A	G
S5_247209714	G/A	5	247209714	G	G	A
S5_247209753	T/G	5	247209753	T	T	G
S5_259331157	A/G	5	259331157	A	A	G
S5_259331192	C/T	5	259331192	C	C	T
S5_261516445	T/G	5	261516445	T	T	G
S5_261922742	G/A	5	261922742	G	G	A
S5_261922767	A/G	5	261922767	A	A	G
S5_262114528	A/G	5	262114528	A	A	G
S5_268725446	G/C	5	268725446	G	G	C
S6_4524475	T/A	6	4524475	T	T	A
S6_26963157	A/G	6	26963157	A	A	G
S6_29726659	T/C	6	29726659	T	T	C
S6_48484252	T/A	6	48484252	A	A	T
S6_49897285	T/A	6	49897285	T	T	A
S6_54264955	G/A	6	54264955	G	G	A
S6_54264995	G/A	6	54264995	G	G	A
S6_61278606	T/A	6	61278606	T	T	A		A
S6_61278610	T/C	6	61278610	T	T	C		C
S6_61278614	T/C	6	61278614	T	T	C		C
S6_77390584	A/G	6	77390584	A	A	G
S6_77390617	G/T	6	77390617	G	G	T
S6_79783831	G/A	6	79783831	G	G	A
S6_83829794	T/A	6	83829794	T	T	A
S6_91704611	T/C	6	91704611	T	T	C
S6_91704634	C/T	6	91704634	C	C	T
S6_94935350	T/C	6	94935350	T	T	C
S7_9630616	C/T	7	9630616	C	C	T		T
S7_59298220	G/T	7	59298220	G	G	T
S7_71034843	A/T	7	71034843	A	A	T
S7_106587940	A/G	7	106587940	A	A	G
S8_360394	C/T	8	360394	C	C	T
S8_965423	A/G	8	965423	A	A	G
S8_3612936	T/C	8	3612936	T	T	C
S8_3612938	C/T	8	3612938	C	C	T
S8_3612950	C/T	8	3612950	C	C	T
S8_5166548	T/C	8	5166548	T	T	C
S8_5166585	G/C	8	5166585	G	G	C
S8_18335556	T/G	8	18335556	T	T	G
S8_18335557	G/T	8	18335557	G	G	T
S8_18538595	C/G	8	18538595	C	C	G	G
S8_18538596	A/G	8	18538596	A	A	G	G
S8_30306102	T/C	8	30306102	T	T	C
S8_30306132	T/G	8	30306132	T	T	G
S8_40622367	G/A	8	40622367	A	A	G	G	G
S8_44778188	A/G	8	44778188	A	A	G
S8_73133431	C/T	8	73133431	C	C	T
S8_74156625	T/G	8	74156625	T	T	G
S8_74156653	A/T	8	74156653	A	A	T
S8_74156654	A/T	8	74156654	A	A	T
S8_78089591	C/T	8	78089591	C	C	T	T
S8_81048551	A/T	8	81048551	A	A	T
S8_81048553	T/A	8	81048553	T	T	A
S8_81540341	A/T	8	81540341	A	A	T
S8_82411439	C/G	8	82411439	C	C	G
S8_82411452	C/G	8	82411452	C	C	G
S8_91773915	C/G	8	91773915	C	C	G
S8_96109280	C/A	8	96109280	C	C	A	A
S8_96109286	C/T	8	96109286	C	C	T	T
S8_96109295	G/A	8	96109295	G	G	A	A
S8_100858344	A/G	8	100858344	A	A	G		G
S8_100858365	C/G	8	100858365	C	C	G
S8_100858446	C/A	8	100858446	C	C	A
S8_100858483	G/A	8	100858483	G	G	A
S8_104649904	C/T	8	104649904	C	C	T	T
S8_104660725	G/T	8	104660725	G	G	T	T
S8_104660804	A/G	8	104660804	A	A	G	G
S8_104660823	A/C	8	104660823	A	A	C	C
S8_107711370	C/T	8	107711370	C	C	T	T
S8_108096844	T/C	8	108096844	T	T	C
S8_108827752	T/A	8	108827752	T	T	A
S8_108827757	C/T	8	108827757	C	C	T
S8_108827764	A/G	8	108827764	A	A	G	G
S8_108827816	C/A	8	108827816	C	C	A
S8_108827849	T/G	8	108827849	T	T	G	G
S8_110016740	G/A	8	110016740	G	G	A
S8_110763595	C/T	8	110763595	C	C	T	T
S8_111262087	G/T	8	111262087	G	G	T
S8_111262108	G/T	8	111262108	G	G	T
S8_111262113	C/T	8	111262113	C	C	T
S8_111262158	A/T	8	111262158	A	A	T
S8_111262160	C/T	8	111262160	C	C	T
S8_111262166	A/G	8	111262166	A	A	G
S8_111489283	T/A	8	111489283	A	A	T	T	T
S8_112627077	A/C	8	112627077	A	A	C
S8_112665306	C/T	8	112665306	C	C	T		T
S8_112738580	A/G	8	112738580	A	A	G	G
S8_114594770	C/T	8	114594770	C	C	T	T
S8_114599098	T/C	8	114599098	T	T	C
S8_119448375	G/C	8	119448375	G	G	C
S8_120445823	C/T	8	120445823	C	C	T
S8_120445870	A/T	8	120445870	A	A	T
S8_120445882	T/C	8	120445882	T	T	C
S8_120481722	C/A	8	120481722	C	C	A	A
S8_120481852	C/T	8	120481852	C	C	T	T
S8_124249405	G/C	8	124249405	G	G	C
S8_124417321	A/G	8	124417321	G	G	A	A
S8_124417348	C/A	8	124417348	A	A	C	C
S8_126247396	C/A	8	126247396	A	A	C	C	C
S8_128986738	T/A	8	128986738	A	A	T	T	T
S8_130036805	T/C	8	130036805	T	T	C
S8_130036822	A/G	8	130036822	G	G	A	A
S8_133787051	C/T	8	133787051	C	C	T	T
S8_133944159	T/C	8	133944159	T	T	C
S8_140216028	A/T	8	140216028	A	A	T	T	T
S8_140216112	A/C	8	140216112	A	A	C		C
S8_140216115	A/T	8	140216115	A	A	T		T
S8_140297500	T/A	8	140297500	A	A	T	T	T
S8_142520603	A/T	8	142520603	T	T	A	A
S8_142520687	G/C	8	142520687	C	C	G	G	G
S8_142520697	T/A	8	142520697	A	A	T	T	T
S8_152168578	T/A	8	152168578	T	T	A
S8_152168579	T/A	8	152168579	T	T	A
S8_153624241	C/T	8	153624241	C	C	T
S8_159749239	A/G	8	159749239	A	A	G
S8_161965952	T/A	8	161965952	T	T	A
S8_161965954	C/T	8	161965954	C	C	T
S8_161965974	T/C	8	161965974	T	T	C	C
S8_170567542	G/A	8	170567542	G	G	A	A
S8_171053601	C/T	8	171053601	C	C	T
S8_172760618	A/C	8	172760618	C	C	A	A	A
S8_174843693	G/A	8	174843693	G	G	A
S8_174843694	G/A	8	174843694	G	G	A
S8_174843702	A/T	8	174843702	A	A	T
S8_174843717	G/T	8	174843717	G	G	T
S8_174843735	A/T	8	174843735	A	A	T		T
S8_175606076	C/T	8	175606076	C	C	T		T
S8_180968400	C/A	8	180968400	C	C	A
S8_180968437	T/C	8	180968437	T	T	C
S8_180968451	C/G	8	180968451	C	C	G
S8_180968453	C/T	8	180968453	C	C	T
S8_183095041	C/G	8	183095041	C	C	G
S8_184679493	T/C	8	184679493	C	C	T	T
S8_185483013	A/T	8	185483013	A	A	T		T
S8_185483017	C/T	8	185483017	C	C	T
S8_186097858	T/A	8	186097858	T	T	A
S8_186097875	T/A	8	186097875	A	A	T	T	T
S8_187338678	C/T	8	187338678	C	C	T
S8_187338694	G/C	8	187338694	G	G	C		C
S8_187338705	A/T	8	187338705	A	A	T		T
S8_189258297	T/C	8	189258297	T	T	C		C
S8_189258314	T/G	8	189258314	T	T	G		G
S8_189258323	A/T	8	189258323	A	A	T		T
S8_190786558	G/T	8	190786558	G	G	T
S8_191581457	T/C	8	191581457	T	T	C		C
S8_191581459	A/T	8	191581459	A	A	T
S8_191581471	T/C	8	191581471	T	T	C		C
S8_191581488	C/T	8	191581488	C	C	T		T
S8_191581582	T/C	8	191581582	T	T	C		C
S9_11100703	C/T	9	11100703	C	C	T
S9_11100724	T/G	9	11100724	T	T	G
S9_11100736	T/A	9	11100736	T	T	A
S9_11100749	G/T	9	11100749	G	G	T
S9_22179577	G/A	9	22179577	G	G	A
S9_22179604	C/T	9	22179604	C	C	T
S9_22179622	T/C	9	22179622	T	T	C
S9_28606413	C/T	9	28606413	C	C	T
S9_29407477	A/G	9	29407477	A	A	G		G
S9_30130413	T/C	9	30130413	C	C	T	T	T
S9_30130414	T/C	9	30130414	C	C	T	T	T
S9_30130424	T/A	9	30130424	A	A	T	T	T
S9_30130427	C/A	9	30130427	A	A	C	C	C
S9_41099061	A/C	9	41099061	A	A	C		C
S9_68591641	C/T	9	68591641	C	C	T		T
S9_68591667	C/T	9	68591667	C	C	T		T
S9_74878751	T/C	9	74878751	T	T	C
S9_77323343	A/C	9	77323343	A	A	C
S9_90052635	T/C	9	90052635	T	T	C
S9_110539425	A/G	9	110539425	A	A	G
S9_159966630	A/T	9	159966630	A	A	T
S9_159966648	T/C	9	159966648	T	T	C
S9_159966670	G/T	9	159966670	G	G	T
S9_159966678	T/A	9	159966678	T	T	A
S9_159966679	A/T	9	159966679	A	A	T
S9_165915880	G/A	9	165915880	G	G	A
S9_165915898	A/G	9	165915898	A	A	G
S9_194836496	T/G	9	194836496	T	T	G
S9_200723249	C/T	9	200723249	C	C	T
S9_200723255	A/C	9	200723255	A	A	C
S9_207164149	C/A	9	207164149	C	C	A
S9_209069494	T/C	9	209069494	T	T	C
S9_210611351	G/A	9	210611351	G	G	A
S9_211258341	T/C	9	211258341	T	T	C
S9_211258368	T/C	9	211258368	T	T	C
S9_217445180	C/T	9	217445180	C	C	T
S9_217445278	A/C	9	217445278	A	A	C
S9_217445289	G/A	9	217445289	G	G	A
S9_217445337	G/A	9	217445337	G	G	A
S9_220649012	A/C	9	220649012	A	A	C
S9_220649018	T/A	9	220649018	T	T	A
S9_223805308	T/C	9	223805308	T	T	C
S9_226978020	T/A	9	226978020	T	T	A
S9_227999701	T/G	9	227999701	T	T	G
S9_227999706	G/A	9	227999706	G	G	A
S9_240824997	T/A	9	240824997	T	T	A
S9_248191483	A/T	9	248191483	A	A	T		T
S10_7997324	G/A	10	7997324	A	A	G
S10_7997337	T/C	10	7997337	C	C	T
S10_7997343	G/C	10	7997343	C	C	G
S10_9945113	G/A	10	9945113	G	G	A
S10_11532516	T/G	10	11532516	G	G	T
S10_11862794	G/T	10	11862794	T	T	G
S10_11862796	T/A	10	11862796	A	A	T
S10_11862811	C/T	10	11862811	T	T	C
S10_12917402	C/A	10	12917402	A	A	C
S10_15767531	A/G	10	15767531	A	A	G
S10_29057904	T/A	10	29057904	A	A	T
S10_29486735	G/A	10	29486735	A	A	G
S10_29486739	T/C	10	29486739	C	C	T
S10_29486740	C/T	10	29486740	T	T	C
S10_29486746	C/T	10	29486746	T	T	C
S10_29486774	G/C	10	29486774	C	C	G
S10_29486792	C/T	10	29486792	T	T	C
S10_29486793	T/A	10	29486793	A	A	T
S10_31261933	G/C	10	31261933	C	C	G
S10_31261956	G/C	10	31261956	C	C	G
S10_31261971	A/G	10	31261971	G	G	A
S10_31261983	T/A	10	31261983	A	A	T
S10_37024735	A/G	10	37024735	G	G	A
S10_37024737	A/G	10	37024737	G	G	A
S10_37024753	G/A	10	37024753	A	A	G
S10_37024781	C/A	10	37024781	A	A	C
S10_37051852	A/T	10	37051852	A	A	T
S10_37051905	A/G	10	37051905	A	A	G
S10_40702191	A/G	10	40702191	A	A	G
S10_40784829	G/A	10	40784829	G	G	A
S10_46381246	T/C	10	46381246	T	T	C
S10_46381248	T/C	10	46381248	T	T	C
S10_46381332	T/G	10	46381332	T	T	G
S10_48113182	G/A	10	48113182	G	G	A
S10_48113191	C/T	10	48113191	C	C	T
S10_48763036	C/T	10	48763036	C	C	T
S10_48808346	T/A	10	48808346	T	T	A
S10_48854361	G/A	10	48854361	A	A	G
S10_53127452	C/T	10	53127452	T	T	C		C
S10_61608375	A/T	10	61608375	A	A	T
S10_71454314	G/C	10	71454314	G	G	C
S10_71454325	A/T	10	71454325	A	A	T
S10_75151456	T/A	10	75151456	A	A	T		T
S10_79456727	C/T	10	79456727	C	C	T
S10_86137903	C/T	10	86137903	T	T	C
S10_101115917	A/G	10	101115917	A	A	G
S10_101905397	G/C	10	101905397	G	G	C
S10_110291530	A/G	10	110291530	A	A	G
S10_125135666	G/A	10	125135666	G	G	A
S10_125473321	C/T	10	125473321	C	C	T
S10_125473322	A/G	10	125473322	A	A	G
S10_127548613	A/G	10	127548613	A	A	G
S10_138353436	C/T	10	138353436	C	C	T		T
S10_138353452	T/C	10	138353452	T	T	C		C
S10_138353468	A/T	10	138353468	A	A	T		T
S10_138353489	G/T	10	138353489	G	G	T		T
S10_139718597	A/G	10	139718597	A	A	G
S10_139718622	C/T	10	139718622	C	C	T
S10_141461189	C/T	10	141461189	C	C	T
S10_145178753	G/A	10	145178753	G	G	A
S10_145178783	A/C	10	145178783	A	A	C
S10_162220667	T/C	10	162220667	T	T	C
S10_162220752	T/A	10	162220752	T	T	A
S10_168568420	C/T	10	168568420	C	C	T
S10_177891944	T/C	10	177891944	T	T	C
S10_184248469	T/G	10	184248469	G	G	T
S10_190784209	G/A	10	190784209	G	G	A
S10_190784233	C/T	10	190784233	C	C	T
S10_191608552	A/G	10	191608552	A	A	G
S10_196850770	C/T	10	196850770	C	C	T
S10_197451320	T/G	10	197451320	T	T	G
S10_200952383	T/A	10	200952383	T	T	A		A
S10_200958445	G/A	10	200958445	A	A	G
S10_210543499	T/A	10	210543499	T	T	A
S10_214525163	C/T	10	214525163	C	C	T
S10_232613361	T/C	10	232613361	T	T	C		C
S10_243536427	C/T	10	243536427	C	C	T
S10_247683573	G/A	10	247683573	G	G	A
S10_247683641	T/C	10	247683641	T	T	C
S10_247683660	A/C	10	247683660	A	A	C		C
S10_247692313	T/G	10	247692313	T	T	G
S10_247692328	T/C	10	247692328	T	T	C
S10_250138231	A/C	10	250138231	A	A	C
S10_256329927	G/A	10	256329927	A	A	G
S10_262330507	A/T	10	262330507	A	A	T
S10_274250752	G/A	10	274250752	G	G	A
S10_282979825	T/A	10	282979825	A	A	T
S10_282979852	G/C	10	282979852	C	C	G
S10_314012270	T/C	10	314012270	C	C	T	T	T
S10_319672161	G/A	10	319672161	G	G	A		A
S10_319672176	A/T	10	319672176	A	A	T
S10_319672286	A/G	10	319672286	A	A	G		G
S10_327100476	T/A	10	327100476	T	T	A
S11_1856533	C/T	11	1856533	C	C	T
S11_1856538	C/T	11	1856538	C	C	T
S11_1856626	G/C	11	1856626	G	G	C
S11_1856627	C/T	11	1856627	C	C	T		T
S11_6162375	A/G	11	6162375	G	G	A		A
S11_8068006	G/A	11	8068006	G	G	A		A
S11_8068019	C/T	11	8068019	C	C	T
S11_8068039	A/G	11	8068039	A	A	G
S11_8068044	A/T	11	8068044	A	A	T
S11_12568139	A/G	11	12568139	A	A	G
S11_12568142	T/G	11	12568142	T	T	G
S11_18172093	C/T	11	18172093	C	C	T
S11_18172124	G/C	11	18172124	G	G	C
S11_18172129	C/G	11	18172129	C	C	G
S11_25306290	T/C	11	25306290	T	T	C
S11_29607737	G/A	11	29607737	G	G	A
S11_34242543	C/A	11	34242543	C	C	A
S11_34915117	A/T	11	34915117	A	A	T
S11_36090918	A/G	11	36090918	A	A	G
S11_36090920	C/G	11	36090920	C	C	G
S11_38166331	C/T	11	38166331	C	C	T
S11_39483680	G/T	11	39483680	G	G	T
S11_39483683	A/C	11	39483683	A	A	C
S11_52815111	T/C	11	52815111	T	T	C		C
S11_56296457	A/C	11	56296457	A	A	C
S11_56296467	C/A	11	56296467	C	C	A
S11_56598649	T/A	11	56598649	T	T	A
S11_59092186	T/G	11	59092186	G	G	T	T	T
S11_64238575	A/G	11	64238575	A	A	G
S11_64238629	C/A	11	64238629	C	C	A
S11_64238630	A/T	11	64238630	A	A	T
S11_66710174	C/T	11	66710174	C	C	T
S11_66710175	C/G	11	66710175	C	C	G
S11_66710177	T/C	11	66710177	T	T	C
S11_66710179	G/T	11	66710179	G	G	T
S11_67342924	T/C	11	67342924	C	C	T		T
S11_67342938	T/C	11	67342938	C	C	T		T
S11_67342969	A/C	11	67342969	C	C	A		A
S11_80695591	G/A	11	80695591	G	G	A
S11_80695611	G/A	11	80695611	G	G	A
S11_112717256	A/C	11	112717256	A	A	C
S11_112717293	T/G	11	112717293	T	T	G
S11_136977576	A/G	11	136977576	A	A	G
S11_137223795	C/T	11	137223795	C	C	T
S11_137223804	T/A	11	137223804	T	T	A
S11_137223809	T/A	11	137223809	T	T	A
S11_179313123	A/T	11	179313123	T	T	A
S11_179313152	G/T	11	179313152	G	G	T
S11_192584586	A/G	11	192584586	A	A	G		G
S11_201831689	C/T	11	201831689	C	C	T
S12_12454848	C/T	12	12454848	C	C	T
S12_23275428	T/C	12	23275428	T	T	C		C
S12_23275429	G/A	12	23275429	G	G	A		A
S12_27658465	C/T	12	27658465	C	C	T
S12_28647497	A/T	12	28647497	A	A	T
S12_48261963	T/A	12	48261963	T	T	A
S12_48352672	T/C	12	48352672	T	T	C
S12_62184830	C/T	12	62184830	C	C	T		T
S12_62184842	C/G	12	62184842	C	C	G		G
S12_82107644	T/G	12	82107644	T	T	G
S12_83058907	A/C	12	83058907	A	A	C
S12_85011065	G/A	12	85011065	G	G	A
S12_85011080	G/A	12	85011080	G	G	A
S12_108158714	T/A	12	108158714	T	T	A
S12_108158723	C/T	12	108158723	C	C	T
S12_108158732	T/C	12	108158732	T	T	C
S12_108158755	A/T	12	108158755	A	A	T
S12_110353002	A/C	12	110353002	A	A	C		C
S12_110353004	C/G	12	110353004	C	C	G		G
S12_110353006	A/G	12	110353006	A	A	G		G
S12_114004563	A/G	12	114004563	A	A	G
S12_114004601	G/A	12	114004601	G	G	A
S12_114004634	A/G	12	114004634	A	A	G
S12_116040226	A/T	12	116040226	A	A	T
S12_125031033	C/A	12	125031033	C	C	A
S12_125049695	A/G	12	125049695	G	G	A	A	A
S12_138481388	G/A	12	138481388	G	G	A
S12_155781384	T/C	12	155781384	T	T	C
S12_156682223	T/A	12	156682223	T	T	A
S12_166645169	C/T	12	166645169	C	C	T
S12_166645171	A/C	12	166645171	A	A	C
S12_166645195	C/T	12	166645195	C	C	T
S12_167802622	A/T	12	167802622	A	A	T
S13_36190015	T/A	13	36190015	T	T	A		A
S13_38254230	A/T	13	38254230	A	A	T
S13_61426224	T/A	13	61426224	T	T	A
S13_68334314	T/G	13	68334314	T	T	G
S13_101322068	G/A	13	101322068	G	G	A
S13_126469907	A/T	13	126469907	T	T	A	A
S13_126469917	G/C	13	126469917	C	C	G	G
S13_126469921	C/T	13	126469921	T	T	C	C
S13_137455836	C/T	13	137455836	C	C	T		T
S13_150349282	T/A	13	150349282	T	T	A
S13_164146788	T/G	13	164146788	T	T	G
S13_179470905	A/T	13	179470905	T	T	A	A	A
S13_189107404	T/G	13	189107404	T	T	G
S13_227973858	A/C	13	227973858	A	A	C		C
S13_227973860	T/A	13	227973860	T	T	A		A
S14_405040	C/A	14	405040	C	C	A
S14_766455	G/A	14	766455	G	G	A
S14_766497	T/G	14	766497	T	T	G
S14_766509	T/C	14	766509	T	T	C
S14_5714454	C/T	14	5714454	C	C	T
S14_5714455	T/C	14	5714455	T	T	C
S14_5714488	T/G	14	5714488	T	T	G
S14_5714517	A/G	14	5714517	A	A	G
S14_13131128	A/G	14	13131128	A	A	G
S14_14588497	A/T	14	14588497	A	A	T
S14_53541653	C/G	14	53541653	C	C	G
S14_53541769	T/C	14	53541769	T	T	C
S14_56452842	C/A	14	56452842	C	C	A
S14_63429817	A/T	14	63429817	T	T	A	A	A
S14_74185497	T/A	14	74185497	T	T	A
S14_74185508	A/T	14	74185508	A	A	T
S14_74185521	C/G	14	74185521	C	C	G
S14_74185534	T/G	14	74185534	T	T	G
S14_74185619	G/A	14	74185619	G	G	A
S14_74185634	C/A	14	74185634	C	C	A
S14_74185649	T/C	14	74185649	T	T	C
S14_74185671	C/A	14	74185671	C	C	A
S14_76744003	T/C	14	76744003	T	T	C
S14_77698731	G/C	14	77698731	G	G	C
S14_77698737	G/A	14	77698737	G	G	A
S14_77698739	C/T	14	77698739	C	C	T
S14_77698783	T/A	14	77698783	T	T	A
S14_77698791	G/A	14	77698791	G	G	A
S14_77698829	G/T	14	77698829	G	G	T
S14_77698836	C/G	14	77698836	C	C	G
S14_81660739	T/C	14	81660739	T	T	C
S14_85680240	C/T	14	85680240	C	C	T
S14_89214159	T/A	14	89214159	T	T	A
S14_92171145	T/C	14	92171145	T	T	C
S14_92171161	C/G	14	92171161	C	C	G
S14_93256274	A/C	14	93256274	A	A	C
S14_105596879	G/A	14	105596879	G	G	A
S14_105596887	T/A	14	105596887	T	T	A
S14_105596888	G/A	14	105596888	G	G	A
S14_105596910	C/T	14	105596910	C	C	T
S14_107985878	C/T	14	107985878	C	C	T
S14_118316784	C/T	14	118316784	C	C	T
S14_118316810	C/A	14	118316810	C	C	A
S14_118316836	C/G	14	118316836	C	C	G
S14_118722981	C/T	14	118722981	C	C	T
S14_119939454	A/T	14	119939454	A	A	T
S14_119939458	A/G	14	119939458	A	A	G
S14_123614481	C/A	14	123614481	C	C	A
S14_123614510	T/C	14	123614510	T	T	C
S14_123796136	A/T	14	123796136	A	A	T
S14_123796179	T/A	14	123796179	A	A	T
S14_132884366	T/G	14	132884366	T	T	G
S14_132884371	T/C	14	132884371	T	T	C
S14_132884375	C/T	14	132884375	C	C	T
S14_140321414	A/T	14	140321414	A	A	T
S14_140321447	G/A	14	140321447	G	G	A
S14_140321481	T/C	14	140321481	T	T	C
S14_140321490	C/G	14	140321490	C	C	G
S14_140460049	T/C	14	140460049	T	T	C
S14_140460055	A/T	14	140460055	A	A	T
S14_140460064	G/A	14	140460064	G	G	A
S14_140460078	G/T	14	140460078	G	G	T
S14_141343718	C/T	14	141343718	C	C	T
S14_144729298	A/G	14	144729298	A	A	G
S14_147670228	A/T	14	147670228	A	A	T
S14_147670235	T/A	14	147670235	T	T	A
S14_149546099	A/T	14	149546099	T	T	A		A
S14_149546199	T/A	14	149546199	T	T	A
S14_149546212	G/A	14	149546212	G	G	A
S14_152880848	A/G	14	152880848	A	A	G
S14_152880865	T/A	14	152880865	T	T	A
S14_152880875	T/C	14	152880875	T	T	C
S14_152880901	G/A	14	152880901	G	G	A
S14_152880911	A/G	14	152880911	A	A	G
S14_152880954	G/T	14	152880954	G	G	T
S14_152880971	A/G	14	152880971	A	A	G
S14_157279577	T/C	14	157279577	T	T	C
S14_157279588	T/G	14	157279588	T	T	G
S14_157279593	G/A	14	157279593	G	G	A
S14_158219283	C/G	14	158219283	C	C	G
S14_160172572	A/T	14	160172572	A	A	T
S14_160172579	A/C	14	160172579	A	A	C
S14_167257262	G/C	14	167257262	G	G	C
S14_168545067	A/T	14	168545067	A	A	T
S14_175034367	A/T	14	175034367	A	A	T
S14_175034399	G/C	14	175034399	G	G	C
S14_175034464	T/C	14	175034464	T	T	C
S14_175064832	A/G	14	175064832	A	A	G
S14_175064848	G/C	14	175064848	G	G	C
S14_175064851	A/G	14	175064851	A	A	G
S14_175065536	T/G	14	175065536	T	T	G
S14_175065549	G/C	14	175065549	G	G	C
S14_175065555	T/C	14	175065555	T	T	C
S14_175065565	T/C	14	175065565	T	T	C
S14_175126897	G/C	14	175126897	G	G	C
S14_180327233	T/C	14	180327233	C	C	T
S14_183734285	T/C	14	183734285	T	T	C
S14_183734295	T/A	14	183734295	T	T	A
S14_183734296	G/A	14	183734296	G	G	A
S14_183734326	G/A	14	183734326	G	G	A
S14_185352586	T/G	14	185352586	T	T	G
S14_185352596	G/A	14	185352596	G	G	A
S14_185352617	T/C	14	185352617	T	T	C
S14_185352648	T/C	14	185352648	T	T	C
S14_185352663	G/A	14	185352663	G	G	A
S14_185352665	A/C	14	185352665	A	A	C
S14_186081217	A/T	14	186081217	A	A	T
S14_186081221	C/T	14	186081221	C	C	T
S14_187617182	T/C	14	187617182	T	T	C
S14_188655168	G/A	14	188655168	G	G	A
S14_188655233	A/T	14	188655233	A	A	T
S14_188655253	G/C	14	188655253	G	G	C
S14_189562133	T/C	14	189562133	T	T	C
S14_197375596	G/T	14	197375596	G	G	T
S14_199203853	C/G	14	199203853	G	G	C
S14_203522404	A/T	14	203522404	A	A	T
S14_203522415	C/T	14	203522415	C	C	T
S14_204036000	T/C	14	204036000	T	T	C
S14_204036027	A/C	14	204036027	A	A	C
S14_204038950	T/C	14	204038950	T	T	C
S14_204038951	G/A	14	204038951	G	G	A
S14_204038952	C/T	14	204038952	C	C	T
S14_206145296	A/T	14	206145296	A	A	T
S14_208785221	G/A	14	208785221	G	G	A
S14_208785229	A/G	14	208785229	A	A	G
S14_209695474	C/T	14	209695474	C	C	T
S14_214382684	G/A	14	214382684	G	G	A
S14_216758866	G/A	14	216758866	A	A	G
S14_220892472	T/C	14	220892472	T	T	C
S14_222899236	T/C	14	222899236	T	T	C
S14_222899239	C/A	14	222899239	C	C	A
S14_227772343	C/T	14	227772343	C	C	T
S14_229246665	A/C	14	229246665	A	A	C
S15_2024876	G/T	15	2024876	G	G	T
S15_30556858	T/C	15	30556858	C	C	T		T
S15_30765931	T/A	15	30765931	T	T	A
S15_30765933	C/T	15	30765933	C	C	T
S15_30765965	A/C	15	30765965	A	A	C
S15_30766019	G/T	15	30766019	G	G	T
S15_39044905	A/C	15	39044905	A	A	C
S15_61003154	G/C	15	61003154	G	G	C
S15_77889924	C/G	15	77889924	C	C	G
S15_77889940	G/T	15	77889940	G	G	T
S15_77889949	T/C	15	77889949	C	C	T
S15_77889961	A/G	15	77889961	G	G	A
S15_121230189	G/A	15	121230189	G	G	A
S15_146506792	G/T	15	146506792	G	G	T
S15_159069210	A/C	15	159069210	A	A	C
S15_165693825	G/A	15	165693825	G	G	A
S15_189516159	A/C	15	189516159	A	A	C
S16_81785150	G/A	16	81785150	G	G	A	A
S16_84223687	C/T	16	84223687	C	C	T
S16_84223700	A/C	16	84223700	A	A	C
S16_84223701	C/T	16	84223701	C	C	T
S16_84480663	T/G	16	84480663	T	T	G
S16_92396676	C/A	16	92396676	C	C	A
S16_101263061	G/A	16	101263061	G	G	A
S16_128189497	T/G	16	128189497	T	T	G
S16_133093031	G/A	16	133093031	G	G	A	A	A
S16_133093037	G/C	16	133093037	G	G	C	C	C
S16_153429730	A/G	16	153429730	A	A	G
S16_153429794	G/T	16	153429794	G	G	T
S16_172278214	C/T	16	172278214	T	T	C
S16_184269537	A/C	16	184269537	A	A	C
S16_184269539	A/C	16	184269539	A	A	C
S16_187118692	C/T	16	187118692	C	C	T
S16_193452300	A/G	16	193452300	A	A	G
S16_194460053	C/G	16	194460053	C	C	G
S16_218376248	T/C	16	218376248	T	T	C
S17_822496	G/A	17	822496	G	G	A
S17_65086242	C/A	17	65086242	C	C	A
S17_93519897	C/T	17	93519897	C	C	T
S17_110020361	A/T	17	110020361	T	T	A
S17_160814805	T/A	17	160814805	T	T	A
S17_187739341	A/G	17	187739341	A	A	G
S17_204529027	A/G	17	204529027	A	A	G
S17_225800201	G/C	17	225800201	G	G	C
S17_237184791	C/T	17	237184791	C	C	T
S17_238058197	A/C	17	238058197	A	A	C
S17_238058198	C/T	17	238058198	C	C	T
S17_252271401	G/A	17	252271401	G	G	A
S17_255117470	G/T	17	255117470	G	G	T
S17_257080692	T/C	17	257080692	T	T	C
†SNPs were common to the detected alien segments of either H. argophyllus or H. petiolaris in the previous study (Qi et al. 2016)
