# Supplementary material for: Introgression and monitoring of wild Helianthus praecox alien segments associated with Sclerotinia basal stalk rot resistance in sunflower using genotyping-by-sequencing
Source: PLoS One. 2019 Mar 1;14(3):e0213065. doi: 10.1371/journal.pone.0213065 (PMC6396933; doi:10.1371/journal.pone.0213065)
Supplement: S5 Table — (XLSX) [file pone.0213065.s006.xlsx]

## Sheet: Sheet1
S5 Table Polymorphic SNPs detected in chromosomes 1, 8, 10, 11, and 14 of the H. praecox sunflower intrgression lines genome
SNP	Alleles	Chromosome	HA 458	HA 89	H.pra 1	H.pra 2	H.pra 3	H.pra 4	H.pra 5	H.pra 6	H.pra 7	H.pra 8
S1_4881505	C/A	1	C	C	C	M	M	C	A	N	C	M
S1_4881512	T/C	1	T	T	T	Y	Y	T	C	N	T	Y
S1_4881513	G/C	1	G	G	G	S	S	G	C	N	G	S
S1_4881525	G/A	1	G	G	G	R	R	G	A	N	G	R
S1_6732702	T/G	1	T	T	T	T	T	T	N	N	N	G
S1_7772477	C/G	1	C	C	G	C	C	G	C	G	C	C
S1_7772494	C/A	1	C	C	A	C	C	A	C	A	C	C
S1_13307968	A/G	1	A	A	A	A	A	R	G	G	G	R
S1_13307969	C/G	1	G	G	G	G	G	S	C	C	C	S
S1_15456481	C/G	1	C	C	C	C	C	S	G	G	G	S
S1_15456493	G/A	1	G	G	G	G	G	R	A	A	A	R
S1_24667271	T/G	1	T	T	T	T	K	T	N	G	G	T
S1_24667274	A/G	1	A	A	A	A	R	A	N	G	G	A
S1_27059435	T/C	1	T	T	T	T	T	Y	C	C	C	Y
S1_27059462	T/G	1	T	T	T	T	T	K	G	G	G	K
S1_28725140	G/A	1	G	G	G	G	G	R	A	R	A	R
S1_28725194	T/A	1	T	T	T	T	T	W	A	A	A	W
S1_31246744	T/A	1	T	T	T	T	T	T	N	A	N	T
S1_31323403	G/T	1	G	G	G	G	G	K	T	T	T	K
S1_31323407	A/G	1	A	A	A	A	A	R	G	G	G	R
S1_32306478	T/C	1	T	T	T	T	T	Y	C	C	C	Y
S1_32306490	C/G	1	C	C	C	C	C	S	G	G	G	S
S1_32306503	C/T	1	C	C	C	C	C	Y	T	T	T	Y
S1_33496170	A/C	1	A	A	A	A	A	A	N	N	N	C
S1_38370085	G/A	1	G	G	G	G	R	G	N	A	A	G
S1_38370099	C/T	1	C	C	C	C	Y	C	N	T	T	C
S1_38370177	C/T	1	C	C	C	C	C	C	N	N	T	C
S1_40380569	C/T	1	C	C	C	C	C	Y	T	T	T	Y
S1_43428550	C/T	1	C	C	C	C	C	C	N	N	T	C
S1_43428570	T/C	1	T	T	T	T	T	T	N	N	C	T
S1_43428575	A/T	1	A	A	A	A	A	A	N	N	T	A
S1_43428584	A/G	1	A	A	A	A	A	A	N	N	G	A
S1_44702296	A/C	1	A	A	A	A	A	M	C	N	C	M
S1_44702311	A/T	1	A	A	A	A	A	W	T	N	T	W
S1_46721834	T/C	1	T	T	T	T	T	Y	C	C	C	Y
S1_46721841	T/A	1	T	T	T	T	T	W	A	A	A	W
S1_48420100	C/A	1	C	C	C	C	C	C	C	C	C	A
S1_48420178	A/G	1	A	A	A	A	A	A	A	A	A	G
S1_48498539	T/C	1	C	C	C	C	Y	C	N	N	T	C
S1_59424317	A/T	1	A	A	A	A	A	W	T	T	T	W
S1_59424324	A/C	1	A	A	A	A	A	M	C	C	C	M
S1_59424466	T/C	1	T	T	T	T	T	Y	C	C	C	Y
S1_59424467	T/A	1	T	T	T	T	T	W	A	A	A	W
S1_59424540	G/A	1	G	G	G	G	G	R	A	A	A	R
S1_61032510	A/G	1	A	A	A	A	A	A	G	R	R	A
S1_62717747	G/A	1	G	G	G	G	G	R	A	A	A	R
S1_63389551	T/A	1	T	T	T	T	T	W	A	A	A	W
S1_64017106	T/C	1	T	T	N	T	T	Y	C	C	C	Y
S1_64017120	G/A	1	G	G	N	G	G	R	A	A	A	R
S1_64995494	T/C	1	T	T	T	T	T	Y	Y	C	C	Y
S1_64995526	C/T	1	C	C	C	C	C	Y	Y	T	T	Y
S1_64995531	A/G	1	A	A	A	A	A	R	R	G	G	R
S1_66877218	T/C	1	T	T	N	Y	T	Y	Y	N	C	C
S1_69531288	G/T	1	G	G	G	G	G	K	T	N	T	G
S1_69531308	C/T	1	C	C	C	C	C	Y	T	N	T	C
S1_69531317	C/T	1	C	C	C	C	C	Y	T	N	T	C
S1_74179559	C/T	1	C	C	C	C	T	C	C	C	C	T
S1_77032581	T/C	1	T	T	T	T	Y	T	T	Y	C	T
S1_77032585	C/T	1	C	C	C	Y	Y	C	T	Y	C	C
S1_77032647	C/G	1	C	C	C	S	S	C	G	S	N	C
S1_88693702	C/T	1	C	C	C	C	C	Y	T	N	T	Y
S1_88693715	T/C	1	T	T	T	T	T	Y	C	N	C	Y
S1_88693750	T/C	1	T	T	T	T	T	Y	C	N	C	Y
S1_92332628	A/T	1	A	A	A	A	A	T	T	W	T	W
S1_93809081	C/A	1	C	C	C	C	C	M	A	A	A	M
S1_93809124	T/G	1	T	T	T	T	T	K	G	G	G	K
S1_93809907	C/A	1	C	C	C	C	C	M	A	A	A	M
S1_93809908	A/C	1	A	A	A	A	A	M	C	C	C	M
S1_93809923	T/C	1	T	T	T	T	T	Y	C	C	C	Y
S1_93809946	G/A	1	G	G	G	G	G	R	A	A	A	R
S1_93876327	G/A	1	G	G	G	G	G	R	A	N	A	R
S1_93876366	T/A	1	T	T	T	T	T	W	A	N	A	W
S1_93876368	A/G	1	A	A	A	A	A	R	G	N	G	R
S1_93876374	G/A	1	G	G	G	G	G	R	A	N	A	R
S1_93876400	C/A	1	C	C	C	C	C	M	A	A	A	M
S1_93876423	C/T	1	C	C	C	C	C	Y	T	T	T	Y
S1_97641652	G/A	1	G	G	G	G	G	R	A	A	A	R
S1_97641674	A/G	1	A	A	A	A	A	R	G	G	G	R
S1_97641676	A/G	1	A	A	A	A	A	R	G	G	G	R
S1_98127344	G/A	1	G	G	G	G	G	G	A	A	A	R
S1_99111212	A/G	1	A	A	A	A	A	R	G	G	G	R
S1_99111213	T/C	1	T	T	T	T	T	Y	C	C	C	Y
S1_99111219	T/G	1	G	G	G	G	G	K	T	T	T	K
S1_99234180	A/G	1	G	G	G	G	R	R	G	G	A	G
S1_99234184	G/T	1	G	G	K	G	G	G	T	T	G	G
S1_99234195	T/G	1	T	T	K	T	T	T	G	G	T	T
S1_99234200	A/C	1	A	A	M	A	A	A	C	C	A	A
S1_99234208	A/G	1	G	G	G	G	R	R	G	G	A	G
S1_99234225	A/T	1	A	A	W	A	A	A	T	T	A	A
S1_99670093	G/A	1	G	G	G	G	G	R	A	A	A	R
S1_99670113	T/A	1	T	T	T	T	T	W	A	A	A	W
S1_99823840	T/G	1	T	T	T	T	T	K	G	G	G	K
S1_99841464	G/A	1	G	G	G	G	G	G	A	A	A	R
S1_99841472	A/G	1	A	A	A	A	A	A	G	G	G	R
S1_99841492	T/G	1	T	T	T	T	T	K	G	G	G	K
S1_102347353	T/C	1	T	T	T	T	T	T	C	N	C	T
S1_102347382	C/T	1	C	C	C	C	C	C	T	N	T	C
S1_107449559	G/A	1	G	G	G	G	G	R	A	A	A	R
S1_117090843	G/A	1	G	G	G	G	G	R	A	A	A	R
S1_117229543	T/G	1	T	T	N	K	K	T	N	G	N	K
S1_117450555	A/G	1	A	A	A	A	A	R	G	G	R	R
S1_117450575	C/T	1	C	C	C	C	C	Y	T	T	Y	Y
S1_117450577	A/G	1	A	A	A	A	A	R	G	G	R	R
S1_119723949	A/C	1	A	A	N	A	A	C	C	C	C	C
S1_119920325	C/T	1	C	C	C	C	C	Y	T	T	T	Y
S1_119920359	G/A	1	G	G	G	G	G	R	A	A	A	R
S1_119920362	T/G	1	T	T	T	T	T	K	G	G	G	K
S1_119920375	A/G	1	A	A	A	A	A	R	G	G	G	R
S1_120328645	A/C	1	A	A	A	A	A	M	C	C	C	M
S1_122194102	G/C	1	G	G	G	G	G	S	C	C	C	S
S1_122194114	A/G	1	A	A	A	A	A	R	G	G	G	R
S1_122194127	C/T	1	C	C	C	C	C	Y	T	T	T	Y
S1_122194130	A/G	1	A	A	A	A	A	R	G	G	G	R
S1_127213966	C/T	1	C	C	C	C	C	Y	T	T	T	C
S1_129139326	A/T	1	A	A	A	A	A	W	T	T	T	A
S1_129139358	T/C	1	T	T	T	T	T	Y	C	C	C	T
S1_129570774	A/T	1	A	A	T	A	A	A	A	N	N	A
S1_141297839	G/A	1	G	G	G	G	G	R	A	A	A	G
S1_141297884	G/T	1	G	G	G	G	G	K	T	T	T	G
S1_148719353	G/A	1	G	G	G	G	G	G	A	A	A	G
S1_150101219	G/A	1	G	G	G	G	G	R	A	A	A	R
S1_152253322	C/T	1	C	C	C	C	C	Y	T	T	T	Y
S1_153633316	T/A	1	T	T	T	T	T	W	A	A	A	W
S1_154525025	G/C	1	C	C	C	C	C	S	G	G	G	S
S1_154525038	T/A	1	T	T	T	T	T	W	A	A	A	W
S1_154525047	T/C	1	C	C	C	C	C	Y	T	T	T	Y
S1_154525051	G/T	1	T	T	T	T	T	K	G	G	G	K
S1_166531558	A/G	1	A	A	A	A	A	A	G	G	A	A
S8_360394	C/T	8	C	C	N	T	T	T	T	T	C	C
S8_965423	A/G	8	A	A	G	G	G	G	G	G	A	A
S8_3612936	T/C	8	T	T	T	T	T	T	T	T	T	C
S8_3612938	C/T	8	C	C	C	C	C	C	C	C	C	T
S8_3612950	C/T	8	C	C	C	C	C	C	C	C	C	T
S8_5166548	T/C	8	T	T	C	C	C	T	C	C	T	T
S8_5166585	G/C	8	G	G	C	C	C	G	C	C	G	G
S8_18335556	T/G	8	T	T	T	T	T	T	T	G	T	T
S8_18335557	G/T	8	G	G	G	G	G	G	G	T	G	G
S8_18538595	C/G	8	C	C	C	G	G	S	G	C	G	N
S8_18538596	A/G	8	A	A	A	G	G	R	G	A	G	N
S8_30306102	T/C	8	T	T	T	T	T	T	T	T	N	C
S8_30306132	T/G	8	T	T	T	T	T	T	T	T	N	G
S8_40622367	G/A	8	A	A	A	G	G	R	G	A	G	N
S8_44778188	A/G	8	A	A	A	N	A	G	G	G	G	A
S8_73133431	C/T	8	C	C	C	C	C	C	C	N	C	T
S8_74156625	T/G	8	T	T	T	T	T	T	T	T	T	G
S8_74156653	A/T	8	A	A	A	A	A	A	A	A	A	T
S8_74156654	A/T	8	A	A	A	A	A	A	A	A	A	T
S8_78089591	C/T	8	C	C	N	T	T	C	T	C	T	C
S8_81048551	A/T	8	A	A	A	A	A	A	A	A	A	T
S8_81048553	T/A	8	T	T	T	T	T	T	T	T	T	A
S8_81540341	A/T	8	A	A	A	A	A	A	A	A	A	T
S8_82411439	C/G	8	C	C	C	C	S	C	C	C	C	G
S8_82411452	C/G	8	C	C	C	C	S	C	C	C	C	G
S8_91773915	C/G	8	C	C	C	C	C	C	C	C	C	G
S8_96109280	C/A	8	C	C	C	A	A	C	A	C	A	N
S8_96109286	C/T	8	C	C	C	T	T	C	T	C	T	N
S8_96109295	G/A	8	G	G	G	A	A	G	A	G	A	N
S8_100858344	A/G	8	A	A	A	A	A	A	A	A	A	G
S8_100858365	C/G	8	C	C	C	C	C	C	C	C	C	G
S8_100858446	C/A	8	C	C	C	C	C	C	C	C	C	A
S8_100858483	G/A	8	G	G	G	G	G	G	G	G	G	A
S8_104649904	C/T	8	C	C	C	T	T	C	Y	C	T	N
S8_104660725	G/T	8	G	G	G	T	T	G	T	G	T	N
S8_104660804	A/G	8	A	A	A	G	G	A	G	A	G	N
S8_104660823	A/C	8	A	A	A	C	C	A	C	A	C	N
S8_107711370	C/T	8	C	C	N	T	T	Y	T	C	T	N
S8_108096844	T/C	8	T	T	T	T	C	Y	Y	N	Y	N
S8_108827752	T/A	8	T	T	T	T	T	T	T	T	T	A
S8_108827757	C/T	8	C	C	C	C	C	C	C	C	C	T
S8_108827764	A/G	8	A	A	A	G	G	A	G	A	G	G
S8_108827816	C/A	8	C	C	N	C	C	C	C	C	C	A
S8_108827849	T/G	8	T	T	T	G	G	T	G	T	G	G
S8_110016740	G/A	8	G	G	G	G	G	G	G	G	G	A
S8_110763595	C/T	8	C	C	N	T	T	C	T	C	T	N
S8_111262087	G/T	8	G	G	G	G	G	G	G	G	G	T
S8_111262108	G/T	8	G	G	G	G	G	G	G	G	G	T
S8_111262113	C/T	8	C	C	C	C	C	C	C	C	C	T
S8_111262158	A/T	8	A	A	A	A	A	A	A	A	A	T
S8_111262160	C/T	8	C	C	C	C	C	C	C	C	C	T
S8_111262166	A/G	8	A	A	A	A	A	A	A	A	A	G
S8_111489283	T/A	8	A	A	N	N	W	N	W	N	N	T
S8_112627077	A/C	8	A	A	A	A	A	A	A	C	A	A
S8_112665306	C/T	8	C	C	C	C	C	C	C	C	C	T
S8_112738580	A/G	8	A	A	A	G	G	A	G	A	G	N
S8_114594770	C/T	8	C	C	C	T	T	C	T	C	T	N
S8_114599098	T/C	8	T	T	T	T	T	T	T	T	T	C
S8_119448375	G/C	8	G	G	G	N	N	G	N	N	N	C
S8_120445823	C/T	8	C	C	C	C	C	C	C	C	C	T
S8_120445870	A/T	8	A	A	A	A	A	A	A	A	A	T
S8_120445882	T/C	8	T	T	T	T	T	T	T	T	T	C
S8_120481722	C/A	8	C	C	C	N	A	M	A	C	A	N
S8_120481852	C/T	8	C	C	N	T	T	Y	T	C	T	N
S8_124249405	G/C	8	G	G	G	N	G	G	G	G	G	C
S8_124417321	A/G	8	G	G	G	A	A	R	A	G	A	N
S8_124417348	C/A	8	A	A	A	C	C	M	C	A	C	N
S8_126247396	C/A	8	A	A	A	C	C	M	C	A	C	N
S8_128986738	T/A	8	A	A	A	T	T	W	T	A	T	N
S8_130036805	T/C	8	T	T	T	T	T	T	T	T	T	C
S8_130036822	A/G	8	G	G	R	A	A	R	A	R	A	G
S8_133787051	C/T	8	C	C	C	T	T	Y	T	C	T	N
S8_133944159	T/C	8	T	T	N	T	T	T	T	T	T	C
S8_140216028	A/T	8	A	A	A	T	T	A	T	A	T	N
S8_140216112	A/C	8	A	A	A	A	A	A	A	A	A	C
S8_140216115	A/T	8	A	A	A	A	A	A	A	A	A	T
S8_140297500	T/A	8	A	A	A	N	T	T	N	A	T	T
S8_142520603	A/T	8	T	T	T	A	A	W	A	W	A	N
S8_142520687	G/C	8	C	C	C	G	G	C	G	C	G	N
S8_142520697	T/A	8	A	A	A	T	T	A	T	A	T	N
S8_152168578	T/A	8	T	T	T	T	T	T	T	T	T	A
S8_152168579	T/A	8	T	T	T	T	T	T	T	T	T	A
S8_153624241	C/T	8	C	C	C	C	C	Y	Y	T	Y	Y
S8_159749239	A/G	8	A	A	A	A	A	A	A	A	A	G
S8_161965952	T/A	8	T	T	T	T	T	T	T	T	T	A
S8_161965954	C/T	8	C	C	C	C	C	C	C	C	C	T
S8_161965974	T/C	8	T	T	T	C	C	Y	C	T	C	T
S8_170567542	G/A	8	G	G	G	A	A	G	A	G	A	N
S8_171053601	C/T	8	C	C	C	N	N	Y	T	Y	Y	Y
S8_172760618	A/C	8	C	C	C	A	A	M	A	M	A	N
S8_174843693	G/A	8	G	G	G	G	G	G	G	G	G	A
S8_174843694	G/A	8	G	G	G	G	G	G	G	G	G	A
S8_174843702	A/T	8	A	A	A	A	A	A	A	A	A	T
S8_174843717	G/T	8	G	G	G	G	G	G	G	G	G	T
S8_174843735	A/T	8	A	A	A	A	A	A	A	A	A	T
S8_175606076	C/T	8	C	C	C	C	C	C	C	C	C	T
S8_180968400	C/A	8	C	C	C	C	C	C	C	C	C	A
S8_180968437	T/C	8	T	T	T	T	T	T	T	T	T	C
S8_180968451	C/G	8	C	C	C	C	C	C	C	C	C	G
S8_180968453	C/T	8	C	C	C	C	C	C	C	C	C	T
S8_183095041	C/G	8	C	C	N	C	C	S	S	C	G	N
S8_184679493	T/C	8	C	C	C	T	T	Y	T	C	T	N
S8_185483013	A/T	8	A	A	T	A	A	W	T	A	A	T
S8_185483017	C/T	8	C	C	N	T	Y	C	C	C	Y	N
S8_186097858	T/A	8	T	T	N	W	W	A	W	T	W	N
S8_186097875	T/A	8	A	A	N	T	T	T	T	A	T	N
S8_187338678	C/T	8	C	C	C	C	C	C	C	C	C	T
S8_187338694	G/C	8	G	G	G	G	G	G	G	G	G	C
S8_187338705	A/T	8	A	A	A	A	A	A	A	A	A	T
S8_189258297	T/C	8	T	T	T	Y	T	T	T	T	Y	C
S8_189258314	T/G	8	T	T	T	K	T	T	T	T	K	G
S8_189258323	A/T	8	A	A	A	W	A	A	A	A	W	T
S8_190786558	G/T	8	G	G	G	T	T	T	K	G	G	T
S8_191581457	T/C	8	T	T	T	T	T	T	T	T	T	C
S8_191581459	A/T	8	A	A	A	A	A	A	A	A	A	T
S8_191581471	T/C	8	T	T	T	T	T	T	T	T	T	C
S8_191581488	C/T	8	C	C	C	C	C	C	C	C	C	T
S8_191581582	T/C	8	T	T	T	T	T	T	T	T	T	C
S10_7997324	G/A	10	A	A	G	G	A	G	R	R	G	A
S10_7997337	T/C	10	C	C	T	T	C	T	Y	Y	T	C
S10_7997343	G/C	10	C	C	G	G	C	G	S	S	G	C
S10_9945113	G/A	10	G	G	R	A	G	G	R	G	G	G
S10_11532516	T/G	10	G	G	T	T	G	T	G	K	T	G
S10_11862794	G/T	10	T	T	G	G	T	G	K	K	G	T
S10_11862796	T/A	10	A	A	T	T	A	T	W	W	T	A
S10_11862811	C/T	10	T	T	C	C	T	C	Y	Y	C	T
S10_12917402	C/A	10	A	A	C	C	A	C	M	A	C	A
S10_15767531	A/G	10	A	A	A	G	A	G	G	R	G	A
S10_29057904	T/A	10	A	A	A	T	A	T	T	N	T	A
S10_29486735	G/A	10	A	A	A	G	A	G	G	R	G	A
S10_29486739	T/C	10	C	C	C	T	C	T	T	Y	T	C
S10_29486740	C/T	10	T	T	T	C	T	C	C	Y	C	T
S10_29486746	C/T	10	T	T	T	C	T	C	C	Y	C	T
S10_29486774	G/C	10	C	C	C	G	C	G	G	S	G	C
S10_29486792	C/T	10	T	T	T	C	T	C	C	Y	C	T
S10_29486793	T/A	10	A	A	A	T	A	T	T	W	T	A
S10_31261933	G/C	10	C	C	C	G	C	G	G	C	G	C
S10_31261956	G/C	10	C	C	C	G	C	G	G	S	G	C
S10_31261971	A/G	10	G	G	G	A	G	A	A	R	A	G
S10_31261983	T/A	10	A	A	A	T	A	T	T	W	T	A
S10_37024735	A/G	10	G	G	G	A	G	A	A	R	A	G
S10_37024737	A/G	10	G	G	G	A	G	A	A	R	A	G
S10_37024753	G/A	10	A	A	A	G	A	G	G	R	G	A
S10_37024781	C/A	10	A	A	A	C	A	C	C	M	C	A
S10_37051852	A/T	10	A	A	A	T	N	T	T	T	T	A
S10_37051905	A/G	10	A	A	A	G	A	G	G	G	G	A
S10_40702191	A/G	10	A	A	A	G	A	G	G	R	G	A
S10_40784829	G/A	10	G	G	G	A	G	A	A	R	A	G
S10_46381246	T/C	10	T	T	T	C	T	C	C	N	C	T
S10_46381248	T/C	10	T	T	T	C	T	C	C	N	C	T
S10_46381332	T/G	10	T	T	T	G	T	G	G	T	G	T
S10_48113182	G/A	10	G	G	G	A	G	A	A	R	A	G
S10_48113191	C/T	10	C	C	C	T	C	T	T	Y	T	C
S10_48763036	C/T	10	C	C	C	T	C	T	T	C	T	C
S10_48808346	T/A	10	T	T	N	A	W	W	T	N	T	T
S10_48854361	G/A	10	A	A	A	G	A	G	G	R	G	A
S10_53127452	C/T	10	T	T	N	C	T	C	N	C	C	T
S10_61608375	A/T	10	A	A	A	T	A	T	T	N	T	A
S10_71454314	G/C	10	G	G	G	G	G	G	C	N	G	G
S10_71454325	A/T	10	A	A	A	A	A	A	T	N	A	A
S10_75151456	T/A	10	A	A	A	T	A	T	T	W	T	A
S10_79456727	C/T	10	C	C	Y	Y	Y	Y	Y	T	Y	Y
S10_86137903	C/T	10	T	T	T	C	T	C	N	C	C	T
S10_101115917	A/G	10	A	A	A	R	A	G	G	G	G	A
S10_101905397	G/C	10	G	G	G	G	G	G	N	G	G	C
S10_110291530	A/G	10	A	A	G	N	A	A	A	A	A	A
S10_125135666	G/A	10	G	G	G	G	G	R	A	G	R	R
S10_125473321	C/T	10	C	C	C	T	C	C	C	C	C	C
S10_125473322	A/G	10	A	A	A	G	A	A	A	A	A	A
S10_127548613	A/G	10	A	A	A	A	A	A	A	G	A	A
S10_138353436	C/T	10	C	C	T	N	C	C	T	N	C	C
S10_138353452	T/C	10	T	T	C	N	T	T	C	N	T	T
S10_138353468	A/T	10	A	A	T	N	A	A	T	N	A	A
S10_138353489	G/T	10	G	G	T	N	G	G	T	N	G	G
S10_139718597	A/G	10	A	A	N	G	A	G	G	G	G	A
S10_139718622	C/T	10	C	C	N	T	C	T	T	T	T	C
S10_141461189	C/T	10	C	C	C	T	C	T	T	C	T	C
S10_145178753	G/A	10	G	G	G	A	G	A	A	R	A	G
S10_145178783	A/C	10	A	A	A	C	A	C	C	M	C	A
S10_162220667	T/C	10	T	T	T	T	T	Y	Y	C	Y	Y
S10_162220752	T/A	10	T	T	N	T	T	W	W	W	A	T
S10_168568420	C/T	10	C	C	C	C	C	C	C	C	C	T
S10_177891944	T/C	10	T	T	T	C	T	C	C	C	C	T
S10_184248469	T/G	10	G	G	G	T	G	T	T	K	T	G
S10_190784209	G/A	10	G	G	G	A	G	A	A	R	A	G
S10_190784233	C/T	10	C	C	C	T	C	T	T	Y	T	C
S10_191608552	A/G	10	A	A	N	G	A	G	N	A	G	A
S10_196850770	C/T	10	C	C	C	T	C	T	T	Y	T	C
S10_197451320	T/G	10	T	T	T	G	T	G	G	K	G	T
S10_200952383	T/A	10	T	T	T	A	T	A	A	N	A	T
S10_200958445	G/A	10	A	A	A	G	A	G	G	R	G	A
S10_210543499	T/A	10	T	T	T	T	W	T	T	A	W	T
S10_214525163	C/T	10	C	C	C	C	C	C	C	C	C	T
S10_232613361	T/C	10	T	T	T	C	T	C	C	C	C	T
S10_243536427	C/T	10	C	C	C	T	Y	Y	Y	Y	C	Y
S10_247683573	G/A	10	G	G	G	A	G	A	A	R	A	G
S10_247683641	T/C	10	T	T	T	C	T	C	C	Y	C	T
S10_247683660	A/C	10	A	A	A	C	A	C	C	M	C	A
S10_247692313	T/G	10	T	T	N	G	T	G	G	N	N	T
S10_247692328	T/C	10	T	T	N	C	T	C	C	N	N	T
S10_250138231	A/C	10	A	A	A	C	A	C	C	A	C	A
S10_256329927	G/A	10	A	A	A	A	A	A	N	G	A	A
S10_262330507	A/T	10	A	A	A	T	A	T	T	W	T	A
S10_274250752	G/A	10	G	G	G	G	G	R	A	R	A	R
S10_282979825	T/A	10	A	A	A	A	A	T	T	W	T	A
S10_282979852	G/C	10	C	C	C	C	C	G	G	S	G	C
S10_314012270	T/C	10	C	C	T	T	T	T	T	N	T	T
S10_319672161	G/A	10	G	G	G	G	A	A	A	G	A	A
S10_319672176	A/T	10	A	A	A	A	T	T	T	A	T	T
S10_319672286	A/G	10	A	A	N	A	G	G	G	A	G	G
S10_327100476	T/A	10	T	T	T	T	A	A	T	T	A	A
S11_1856533	C/T	11	C	C	C	T	Y	C	T	T	C	C
S11_1856538	C/T	11	C	C	C	T	Y	C	T	T	C	C
S11_1856626	G/C	11	G	G	G	C	C	G	N	N	G	G
S11_1856627	C/T	11	C	C	C	T	T	C	N	N	C	C
S11_6162375	A/G	11	G	G	G	A	R	G	A	A	G	A
S11_8068006	G/A	11	G	G	G	A	A	G	A	G	G	A
S11_8068019	C/T	11	C	C	C	T	T	C	T	C	C	T
S11_8068039	A/G	11	A	A	A	G	G	A	G	A	A	G
S11_8068044	A/T	11	A	A	A	T	T	A	T	A	A	T
S11_12568139	A/G	11	A	A	A	A	A	A	N	A	A	G
S11_12568142	T/G	11	T	T	T	G	K	T	N	T	T	T
S11_18172093	C/T	11	C	C	C	C	C	C	C	C	C	T
S11_18172124	G/C	11	G	G	G	G	G	G	G	G	G	C
S11_18172129	C/G	11	C	C	C	C	C	C	C	C	C	G
S11_25306290	T/C	11	T	T	T	C	Y	T	C	T	T	C
S11_29607737	G/A	11	G	G	G	G	G	R	G	A	G	G
S11_34242543	C/A	11	C	C	A	A	C	C	A	A	C	C
S11_34915117	A/T	11	A	A	A	A	A	A	A	T	A	A
S11_36090918	A/G	11	A	A	N	A	A	R	R	G	G	G
S11_36090920	C/G	11	C	C	N	C	C	S	S	G	G	G
S11_38166331	C/T	11	C	C	C	T	T	C	T	C	C	T
S11_39483680	G/T	11	G	G	G	T	T	G	T	G	G	T
S11_39483683	A/C	11	A	A	A	C	C	A	C	A	A	C
S11_52815111	T/C	11	T	T	T	C	C	Y	C	T	T	T
S11_56296457	A/C	11	A	A	A	A	A	M	A	C	M	M
S11_56296467	C/A	11	C	C	C	A	C	M	C	C	C	C
S11_56598649	T/A	11	T	T	T	N	A	T	N	T	T	W
S11_59092186	T/G	11	G	G	K	K	K	K	K	K	K	T
S11_64238575	A/G	11	A	A	A	G	G	R	G	A	A	A
S11_64238629	C/A	11	C	C	C	A	A	A	A	C	C	C
S11_64238630	A/T	11	A	A	A	T	T	T	T	A	A	A
S11_66710174	C/T	11	C	C	C	T	T	Y	T	C	C	C
S11_66710175	C/G	11	C	C	C	G	G	S	G	C	C	C
S11_66710177	T/C	11	T	T	T	C	C	Y	C	T	T	T
S11_66710179	G/T	11	G	G	G	T	T	K	T	G	G	G
S11_67342924	T/C	11	C	C	C	N	T	Y	T	C	T	Y
S11_67342938	T/C	11	C	C	C	N	T	Y	T	C	T	Y
S11_67342969	A/C	11	C	C	C	N	A	M	A	C	A	M
S11_80695591	G/A	11	G	G	G	G	G	R	R	G	R	A
S11_80695611	G/A	11	G	G	G	G	G	R	R	G	R	A
S11_112717256	A/C	11	A	A	N	C	A	A	C	N	A	A
S11_112717293	T/G	11	T	T	N	G	T	T	G	N	T	T
S11_136977576	A/G	11	A	A	G	N	R	A	G	G	A	A
S11_137223795	C/T	11	C	C	C	C	T	C	C	C	C	T
S11_137223804	T/A	11	T	T	T	T	A	T	T	T	T	A
S11_137223809	T/A	11	T	T	T	T	A	T	T	T	T	A
S11_179313123	A/T	11	T	T	T	A	A	W	A	T	T	T
S11_179313152	G/T	11	G	G	G	T	T	K	T	G	G	G
S11_192584586	A/G	11	A	A	R	N	G	R	A	N	A	G
S11_201831689	C/T	11	C	C	C	C	C	C	C	C	C	T
S14_405040	C/A	14	C	C	C	N	N	C	N	C	N	A
S14_766455	G/A	14	G	G	R	A	G	G	N	G	G	R
S14_766497	T/G	14	T	T	K	G	T	T	N	T	T	K
S14_766509	T/C	14	T	T	Y	C	T	T	N	T	N	Y
S14_5714454	C/T	14	C	C	C	C	T	C	C	C	C	T
S14_5714455	T/C	14	T	T	T	T	C	T	T	T	T	C
S14_5714488	T/G	14	T	T	T	T	G	T	T	T	T	G
S14_5714517	A/G	14	A	A	A	A	G	A	A	A	A	G
S14_13131128	A/G	14	A	A	A	A	G	A	A	A	A	G
S14_14588497	A/T	14	A	A	A	A	A	A	W	A	W	T
S14_53541653	C/G	14	C	C	C	C	G	C	C	C	C	G
S14_53541769	T/C	14	T	T	T	T	C	T	T	N	T	C
S14_56452842	C/A	14	C	C	C	N	C	C	M	C	A	C
S14_63429817	A/T	14	T	T	A	A	A	W	A	N	A	T
S14_74185497	T/A	14	T	T	T	T	A	T	T	T	T	A
S14_74185508	A/T	14	A	A	A	A	T	A	A	A	A	T
S14_74185521	C/G	14	C	C	C	C	G	C	C	C	C	G
S14_74185534	T/G	14	T	T	T	T	G	T	T	T	T	G
S14_74185619	G/A	14	G	G	G	G	A	G	G	G	G	A
S14_74185634	C/A	14	C	C	C	C	A	C	C	C	C	A
S14_74185649	T/C	14	T	T	T	T	C	T	T	T	T	C
S14_74185671	C/A	14	C	C	C	C	A	C	C	C	C	A
S14_76744003	T/C	14	T	T	T	T	C	T	T	T	T	C
S14_77698731	G/C	14	G	G	G	G	C	G	G	G	G	C
S14_77698737	G/A	14	G	G	G	G	A	G	G	G	G	A
S14_77698739	C/T	14	C	C	C	C	T	C	C	C	C	T
S14_77698783	T/A	14	T	T	T	T	A	T	N	T	T	A
S14_77698791	G/A	14	G	G	G	G	A	G	N	G	G	A
S14_77698829	G/T	14	G	G	G	G	T	G	N	G	G	T
S14_77698836	C/G	14	C	C	C	C	G	C	N	C	C	G
S14_81660739	T/C	14	T	T	T	T	Y	T	T	T	T	C
S14_85680240	C/T	14	C	C	Y	C	C	Y	T	T	C	C
S14_89214159	T/A	14	T	T	W	T	W	W	W	A	W	W
S14_92171145	T/C	14	T	T	T	T	C	T	T	T	T	C
S14_92171161	C/G	14	C	C	C	C	G	C	C	C	C	G
S14_93256274	A/C	14	A	A	C	A	A	A	N	N	A	A
S14_105596879	G/A	14	G	G	R	G	G	R	G	A	G	N
S14_105596887	T/A	14	T	T	W	T	T	W	T	A	T	N
S14_105596888	G/A	14	G	G	R	G	G	R	G	A	G	N
S14_105596910	C/T	14	C	C	Y	C	C	Y	C	T	C	N
S14_107985878	C/T	14	C	C	T	T	C	C	T	T	C	C
S14_118316784	C/T	14	C	C	C	C	T	C	C	C	C	T
S14_118316810	C/A	14	C	C	C	C	A	C	C	C	C	A
S14_118316836	C/G	14	C	C	C	C	G	C	C	S	C	G
S14_118722981	C/T	14	C	C	C	C	T	C	C	C	C	T
S14_119939454	A/T	14	A	A	A	A	T	A	A	A	A	T
S14_119939458	A/G	14	A	A	A	A	G	A	A	A	A	G
S14_123614481	C/A	14	C	C	C	C	A	C	C	C	C	N
S14_123614510	T/C	14	T	T	T	T	C	T	T	T	T	N
S14_123796136	A/T	14	A	A	T	W	A	W	A	N	A	W
S14_123796179	T/A	14	A	A	T	W	A	W	A	N	A	W
S14_132884366	T/G	14	T	T	T	T	G	T	T	T	T	G
S14_132884371	T/C	14	T	T	T	T	C	T	T	T	T	C
S14_132884375	C/T	14	C	C	C	C	T	C	C	C	C	T
S14_140321414	A/T	14	A	A	A	A	T	A	A	A	A	T
S14_140321447	G/A	14	G	G	G	G	A	G	G	G	G	A
S14_140321481	T/C	14	T	T	T	T	C	T	T	T	T	C
S14_140321490	C/G	14	C	C	C	C	G	C	C	C	C	G
S14_140460049	T/C	14	T	T	T	T	C	T	T	T	T	C
S14_140460055	A/T	14	A	A	A	A	T	A	A	W	A	T
S14_140460064	G/A	14	G	G	G	G	A	G	G	G	G	A
S14_140460078	G/T	14	G	G	G	G	T	G	G	K	G	T
S14_141343718	C/T	14	C	C	C	C	T	C	C	C	C	T
S14_144729298	A/G	14	A	A	A	A	G	A	A	A	A	G
S14_147670228	A/T	14	A	A	A	A	W	A	A	A	A	T
S14_147670235	T/A	14	T	T	T	T	W	T	T	T	T	A
S14_149546099	A/T	14	T	T	T	T	T	T	A	A	A	W
S14_149546199	T/A	14	T	T	N	N	T	W	A	A	A	T
S14_149546212	G/A	14	G	G	N	N	G	R	A	A	A	G
S14_152880848	A/G	14	A	A	A	A	G	A	A	A	A	G
S14_152880865	T/A	14	T	T	T	T	A	T	T	T	T	A
S14_152880875	T/C	14	T	T	T	T	C	T	T	T	T	C
S14_152880901	G/A	14	G	G	G	G	A	G	G	G	G	A
S14_152880911	A/G	14	A	A	A	A	G	A	A	A	A	G
S14_152880954	G/T	14	G	G	G	G	T	G	G	G	G	T
S14_152880971	A/G	14	A	A	A	A	G	A	A	A	A	G
S14_157279577	T/C	14	T	T	T	T	T	T	C	N	N	T
S14_157279588	T/G	14	T	T	T	T	T	T	G	N	N	T
S14_157279593	G/A	14	G	G	G	G	G	G	A	N	N	G
S14_158219283	C/G	14	C	C	C	C	G	C	C	C	C	G
S14_160172572	A/T	14	A	A	A	A	T	A	A	A	A	T
S14_160172579	A/C	14	A	A	A	A	C	A	A	A	A	C
S14_167257262	G/C	14	G	G	G	G	C	G	G	G	G	C
S14_168545067	A/T	14	A	A	N	N	W	A	T	A	N	A
S14_175034367	A/T	14	A	A	A	A	T	A	A	A	A	T
S14_175034399	G/C	14	G	G	G	G	C	G	G	G	G	C
S14_175034464	T/C	14	T	T	T	T	C	T	T	T	T	C
S14_175064832	A/G	14	A	A	A	A	G	A	A	A	A	G
S14_175064848	G/C	14	G	G	G	G	C	G	G	G	G	C
S14_175064851	A/G	14	A	A	A	A	G	A	A	A	A	G
S14_175065536	T/G	14	T	T	T	T	G	T	T	T	T	G
S14_175065549	G/C	14	G	G	G	G	C	G	G	G	G	C
S14_175065555	T/C	14	T	T	T	T	C	T	T	T	T	C
S14_175065565	T/C	14	T	T	T	T	C	T	T	T	T	C
S14_175126897	G/C	14	G	G	G	G	C	G	G	G	G	C
S14_180327233	T/C	14	C	C	C	C	T	C	N	N	C	T
S14_183734285	T/C	14	T	T	T	T	C	T	T	T	T	C
S14_183734295	T/A	14	T	T	T	T	A	T	T	T	T	A
S14_183734296	G/A	14	G	G	G	G	A	G	G	G	G	A
S14_183734326	G/A	14	G	G	G	G	A	G	G	G	G	A
S14_185352586	T/G	14	T	T	T	T	G	T	T	T	T	G
S14_185352596	G/A	14	G	G	G	G	A	G	G	G	G	A
S14_185352617	T/C	14	T	T	T	T	C	T	T	T	T	C
S14_185352648	T/C	14	T	T	T	T	C	T	T	T	T	C
S14_185352663	G/A	14	G	G	G	G	A	G	G	G	G	A
S14_185352665	A/C	14	A	A	A	A	C	A	A	A	A	C
S14_186081217	A/T	14	A	A	N	A	A	A	T	A	A	A
S14_186081221	C/T	14	C	C	N	C	C	C	C	T	C	C
S14_187617182	T/C	14	T	T	T	T	C	T	T	T	T	C
S14_188655168	G/A	14	G	G	G	G	A	G	G	G	G	A
S14_188655233	A/T	14	A	A	A	A	T	A	A	A	A	T
S14_188655253	G/C	14	G	G	G	G	C	G	G	G	G	C
S14_189562133	T/C	14	T	T	T	T	C	T	T	T	T	C
S14_197375596	G/T	14	G	G	G	G	T	G	G	G	G	T
S14_199203853	C/G	14	G	G	G	G	C	G	G	G	G	C
S14_203522404	A/T	14	A	A	A	A	T	A	A	A	A	T
S14_203522415	C/T	14	C	C	C	C	T	C	C	C	C	T
S14_204036000	T/C	14	T	T	T	T	C	T	T	T	T	C
S14_204036027	A/C	14	A	A	A	A	C	A	A	A	A	C
S14_204038950	T/C	14	T	T	T	Y	C	T	Y	T	T	C
S14_204038951	G/A	14	G	G	G	G	A	G	G	G	G	A
S14_204038952	C/T	14	C	C	C	C	T	C	C	C	C	T
S14_206145296	A/T	14	A	A	A	A	T	A	A	A	A	T
S14_208785221	G/A	14	G	G	G	G	A	G	G	G	G	A
S14_208785229	A/G	14	A	A	A	A	G	A	A	A	A	G
S14_209695474	C/T	14	C	C	T	C	C	C	Y	C	C	C
S14_214382684	G/A	14	G	G	G	G	A	G	G	G	G	A
S14_216758866	G/A	14	A	A	A	A	G	R	R	A	R	G
S14_220892472	T/C	14	T	T	N	T	C	T	T	T	T	Y
S14_222899236	T/C	14	T	T	Y	T	T	Y	C	C	T	T
S14_222899239	C/A	14	C	C	M	C	C	M	A	A	C	C
S14_227772343	C/T	14	C	C	C	C	T	C	C	C	C	T
S14_229246665	A/C	14	A	A	A	A	N	M	M	C	M	M
N: no data; K represents GT, M: AC, R: AG, S: CG, Y: TC, and W: TA
